# Supplementary material for: Rockfall triggering and meteorological variables in the Dolomites (Italian Eastern Alps)
Source: Copernicus journal article supplement (doi:10.5194/nhess-26-187-2026), 2026-01-16
Supplement: Supplementary file 1 [file nhess-26-187-2026-supplement.pdf]

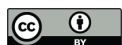

*Supplement of*

## **Rockfall triggering and meteorological variables in the Dolomites (Italian Eastern Alps)**

**Francesca N. Bonometti et al.**

*Correspondence to:* Francesca N. Bonometti ([f.bonometti2@campus.unimib.it](mailto:f.bonometti2@campus.unimib.it))

The copyright of individual parts of the supplement might differ from the article licence.

# Supplementary materials

## S1 Climate Analysis

### S1.1 Rainfall

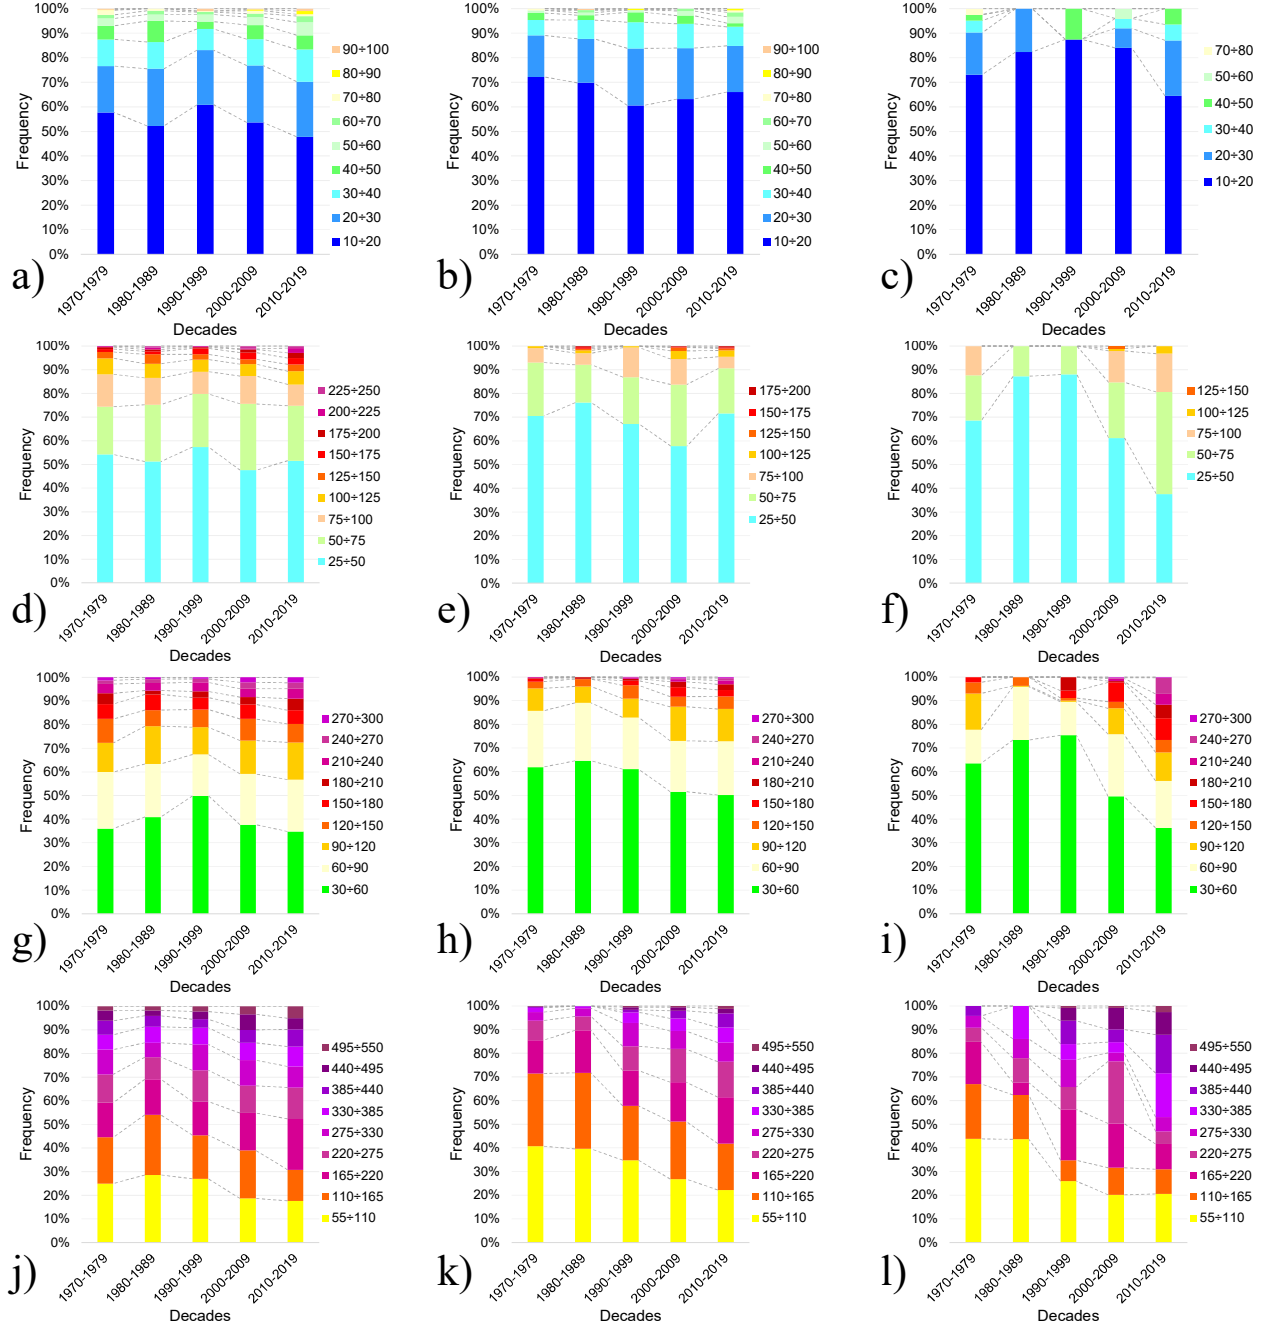

5 Fig. S1 Frequency of rainfall during winter season with different aggregation scale and for different altitude. (a) below 1000m and Sa=0, (b) between 1000m-2000m and Sa=0, (c) above 2000m and Sa=0, (d) below 1000m and Sa=7, (e) between 1000m-2000m and Sa=7, (f) above 2000m and Sa=7, (g) below 1000m and Sa=30, (h) between 1000m-2000m and Sa=30, (i) above 2000m and Sa=30, (j) below 1000m and Sa=90, (k) between 1000m-2000m and Sa=90, (l) above 2000m and Sa=90.

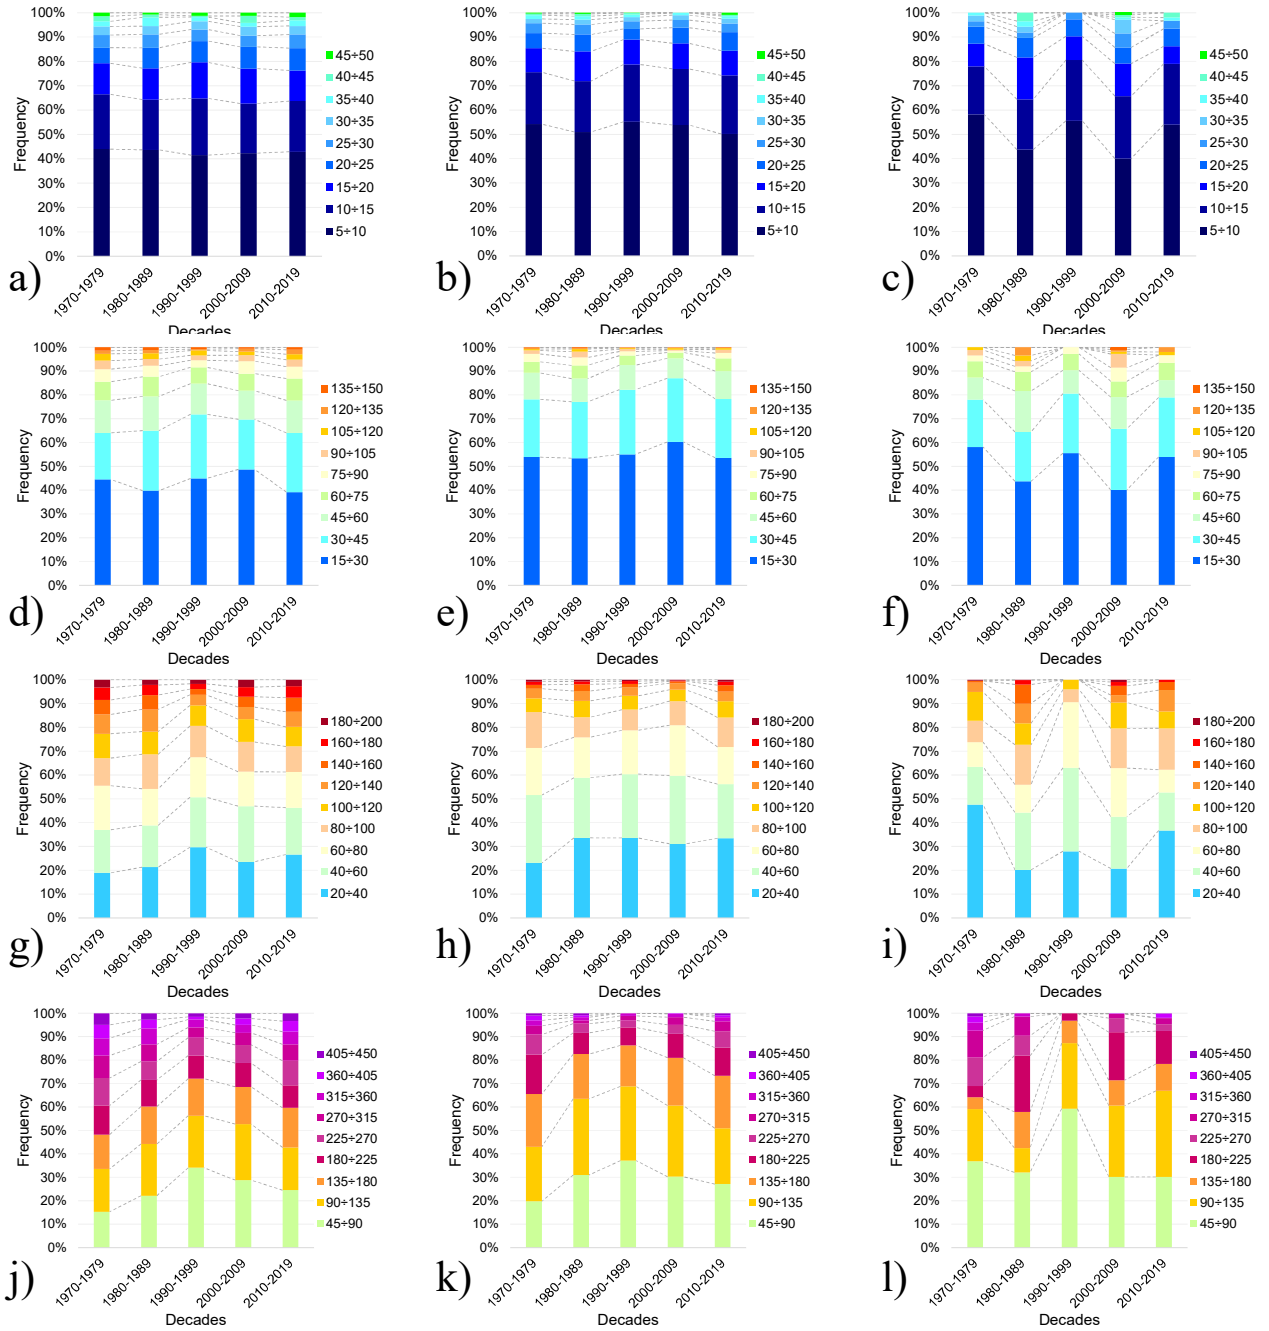

10 **Fig. S2 Frequency of rainfall during spring season with different aggregation scale and for different altitude. (a) below 1000m and  $S_a=0$ , (b) between 1000m-2000m and  $S_a=0$ , (c) above 2000m and  $S_a=0$ , (d) below 1000m and  $S_a=7$ , (e) between 1000m-2000m and  $S_a=7$ , (f) above 2000m and  $S_a=7$ , (g) below 1000m and  $S_a=30$ , (h) between 1000m-2000m and  $S_a=30$ , (i) above 2000m and  $S_a=30$ , (j) below 1000m and  $S_a=90$ , (k) between 1000m-2000m and  $S_a=90$ , (l) above 2000m and  $S_a=90$ .**

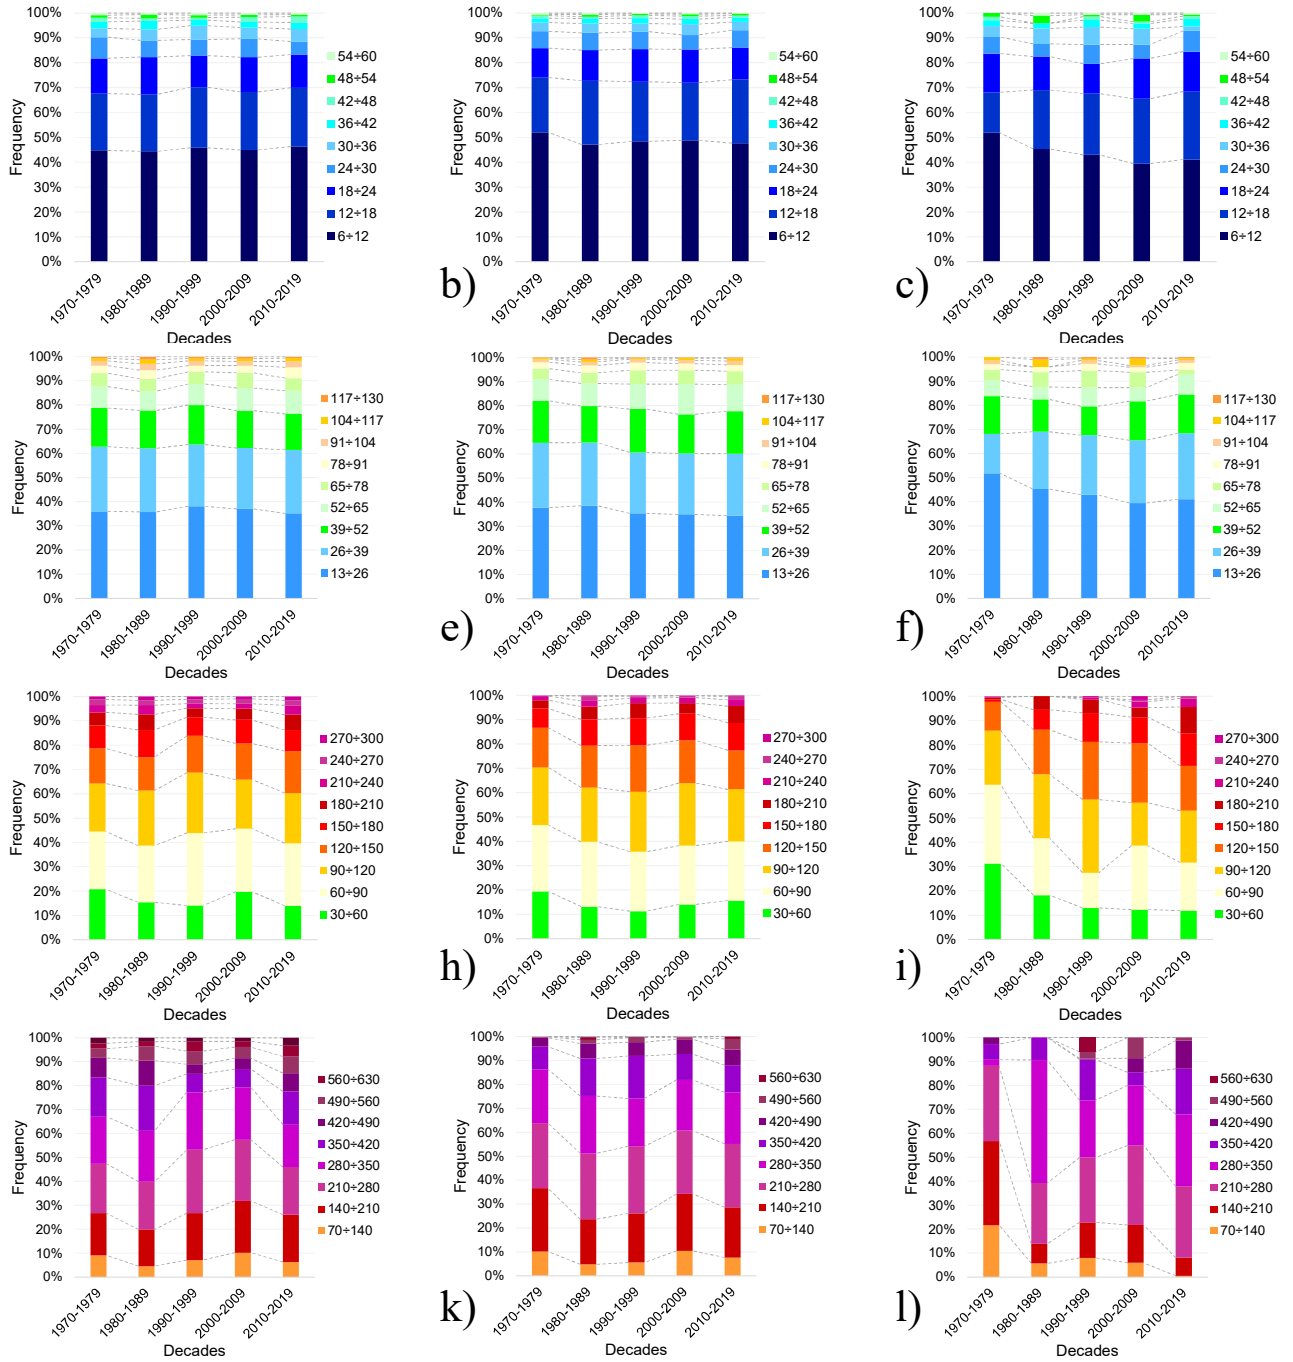

15 **Fig. S3** Frequency of rainfall during summer season with different aggregation scale and for different altitude. (a) below 1000m and  $S_a=0$ , (b) between 1000m-2000m and  $S_a=0$ , (c) above 2000m and  $S_a=0$ , (d) below 1000m and  $S_a=7$ , (e) between 1000m-2000m and  $S_a=7$ , (f) above 2000m and  $S_a=7$ , (g) below 1000m and  $S_a=30$ , (h) between 1000m-2000m and  $S_a=30$ , (i) above 2000m and  $S_a=30$ , (j) below 1000m and  $S_a=90$ , (k) between 1000m-2000m and  $S_a=90$ , (l) above 2000m and  $S_a=90$ .



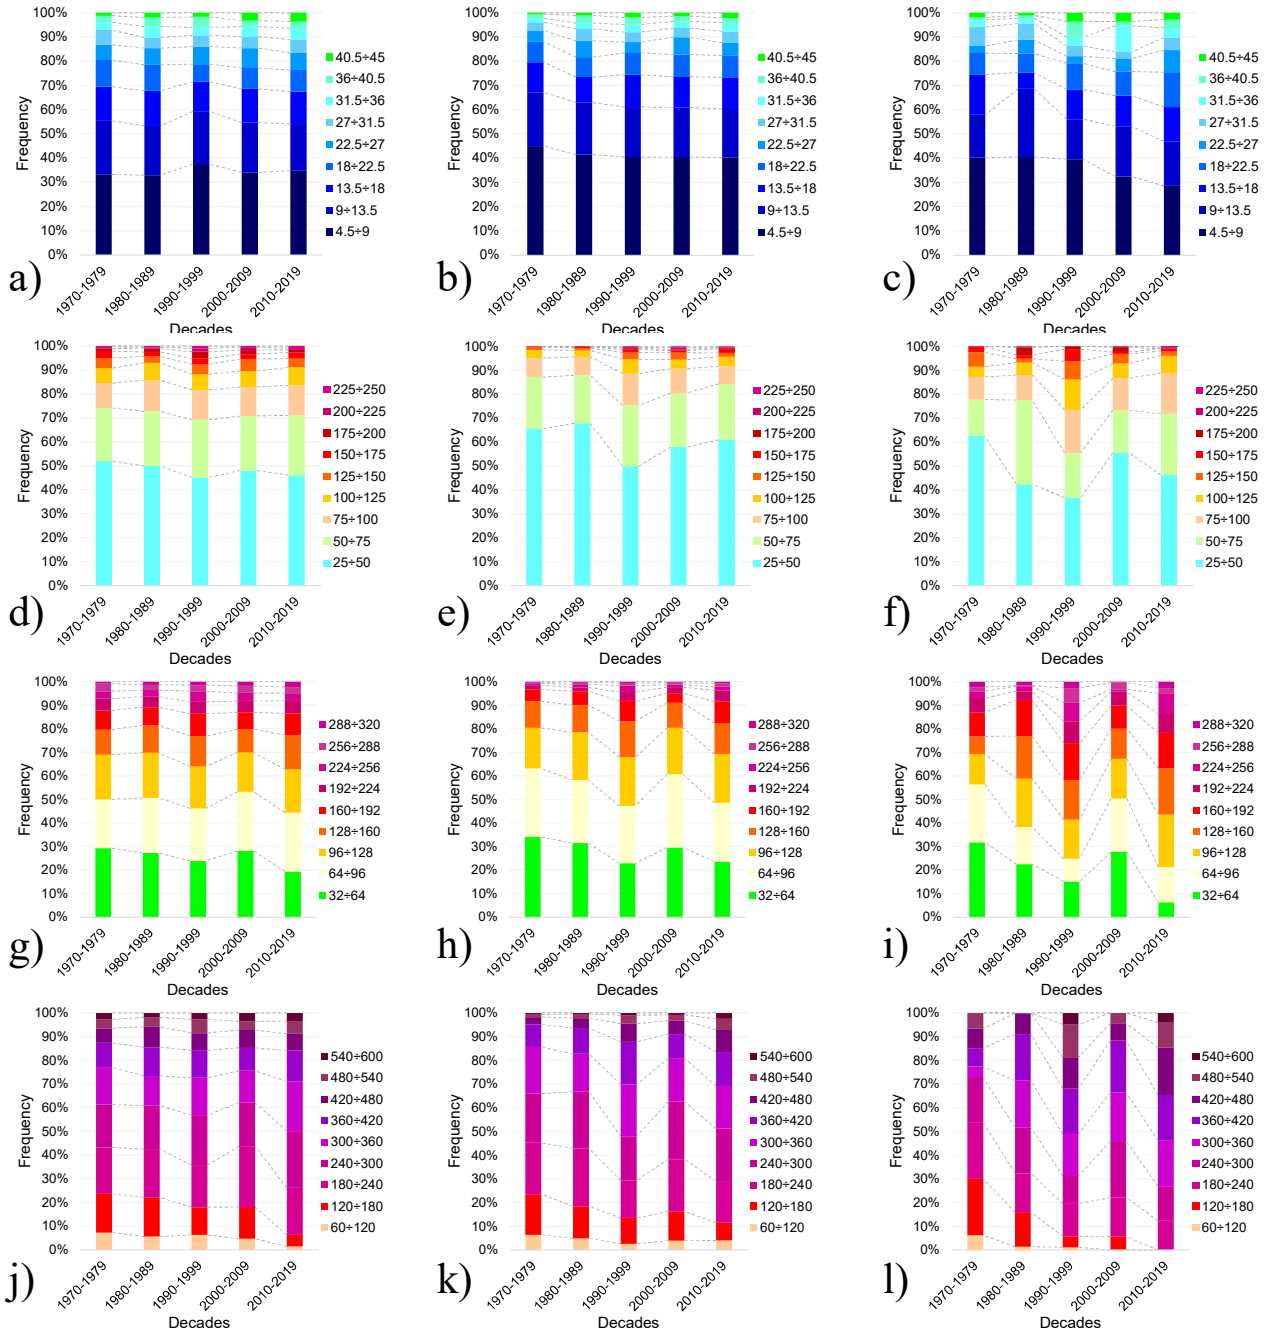

20 **Fig. S4** Frequency of rainfall during autumn season with different aggregation scale and for different altitude. (a) below 1000m and  $S_a=0$ , (b) between 1000m-2000m and  $S_a=0$ , (c) above 2000m and  $S_a=0$ , (d) below 1000m and  $S_a=7$ , (e) between 1000m-2000m and  $S_a=7$ , (f) above 2000m and  $S_a=7$ , (g) below 1000m and  $S_a=30$ , (h) between 1000m-2000m and  $S_a=30$ , (i) above 2000m and  $S_a=30$ , (j) below 1000m and  $S_a=90$ , (k) between 1000m-2000m and  $S_a=90$ , (l) above 2000m and  $S_a=90$ .

## S1.2 Air mean temperature

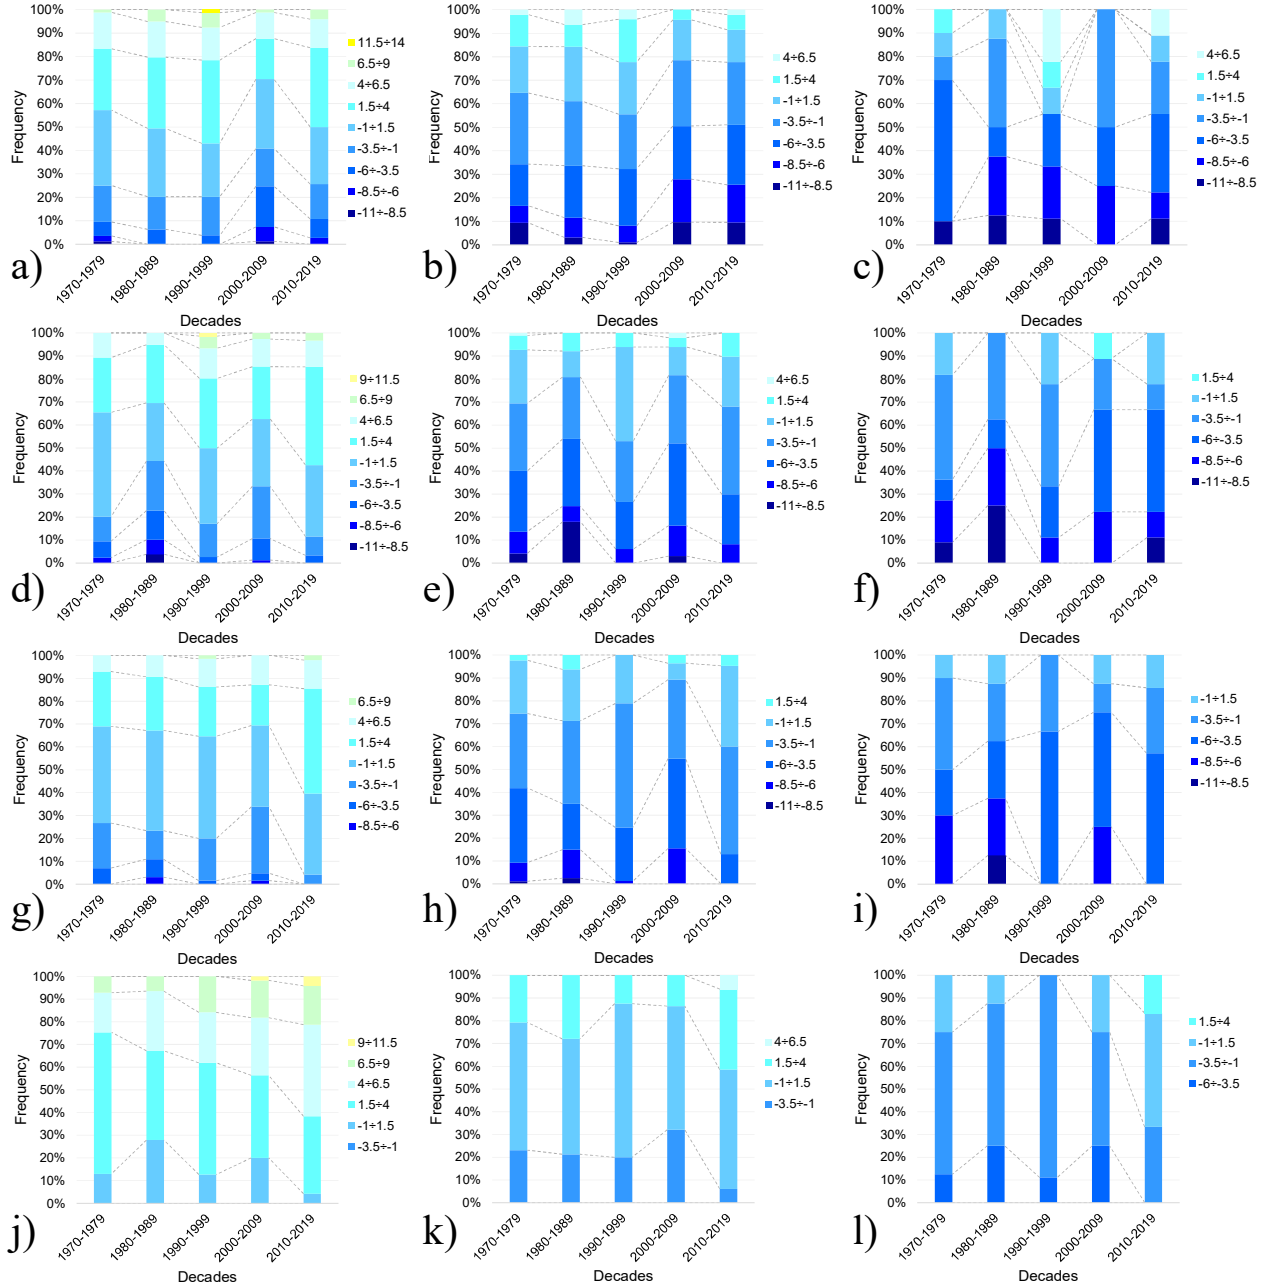

**Fig. S5** Frequency of air mean temperature during winter season with different aggregation scale and for different altitude. (a) below 1000m and  $S_a=0$ , (b) between 1000m-2000m and  $S_a=0$ , (c) above 2000m and  $S_a=0$ , (d) below 1000m and  $S_a=7$ , (e) between 1000m-2000m and  $S_a=7$ , (f) above 2000m and  $S_a=7$ , (g) below 1000m and  $S_a=30$ , (h) between 1000m-2000m and  $S_a=30$ , (i) above 2000m and  $S_a=30$ , (j) below 1000m and  $S_a=90$ , (k) between 1000m-2000m and  $S_a=90$ , (l) above 2000m and  $S_a=90$ .

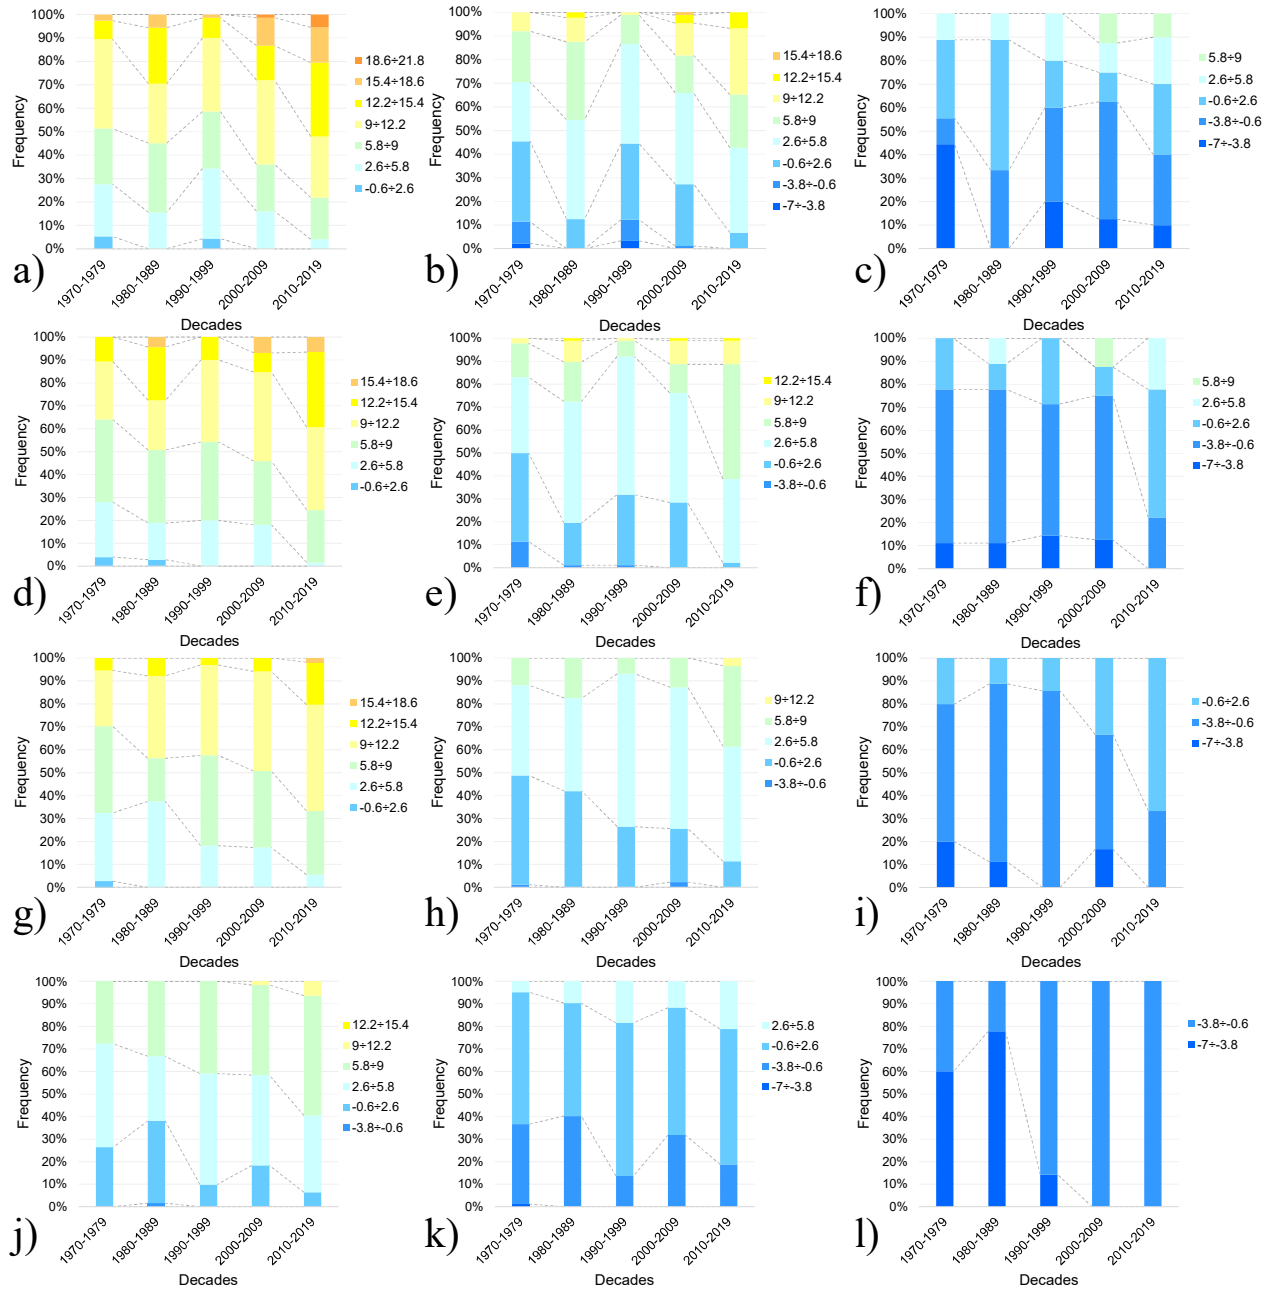

**Fig. S6** Frequency of air mean temperature during spring season with different aggregation scale and for different altitude. (a) below 1000m and  $S_a=0$ , (b) between 1000m-2000m and  $S_a=0$ , (c) above 2000m and  $S_a=0$ , (d) below 1000m and  $S_a=7$ , (e) between 1000m-2000m and  $S_a=7$ , (f) above 2000m and  $S_a=7$ , (g) below 1000m and  $S_a=30$ , (h) between 1000m-2000m and  $S_a=30$ , (i) above 2000m and  $S_a=30$ , (j) below 1000m and  $S_a=90$ , (k) between 1000m-2000m and  $S_a=90$ , (l) above 2000m and  $S_a=90$ .

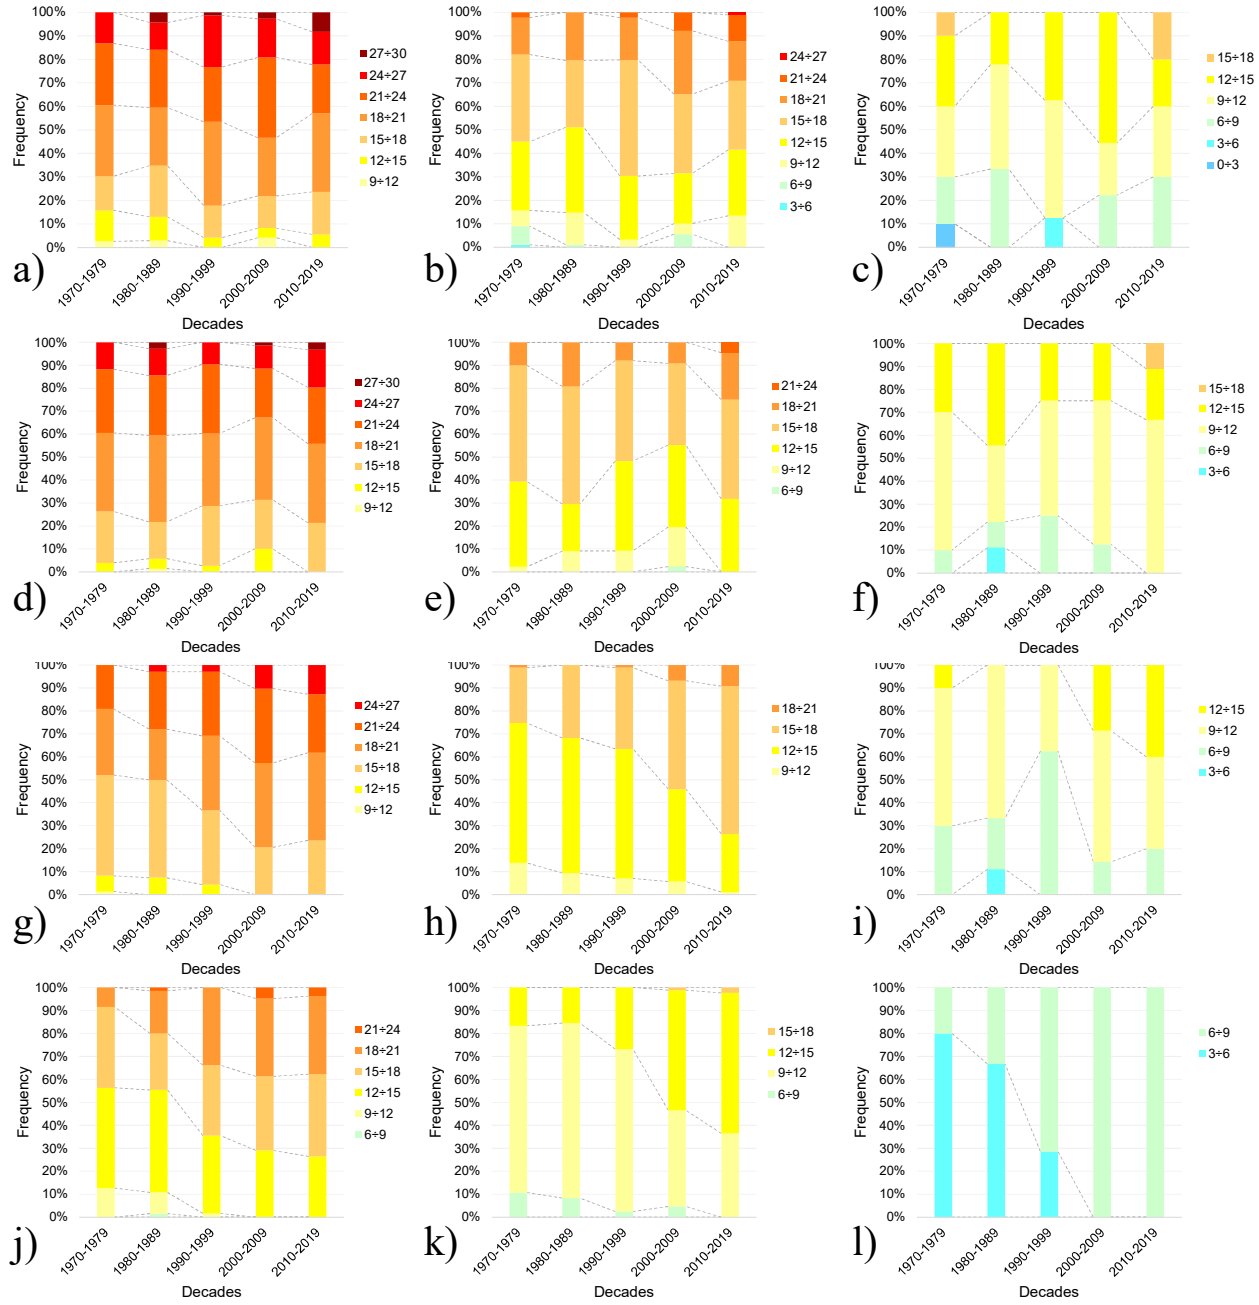

**Fig. S7** Frequency of air mean temperature during summer season with different aggregation scale and for different altitude. (a) below 1000m and  $S_a=0$ , (b) between 1000m-2000m and  $S_a=0$ , (c) above 2000m and  $S_a=0$ , (d) below 1000m and  $S_a=7$ , (e) between 1000m-2000m and  $S_a=7$ , (f) above 2000m and  $S_a=7$ , (g) below 1000m and  $S_a=30$ , (h) between 1000m-2000m and  $S_a=30$ , (i) above 2000m and  $S_a=30$ , (j) below 1000m and  $S_a=90$ , (k) between 1000m-2000m and  $S_a=90$ , (l) above 2000m and  $S_a=90$ .

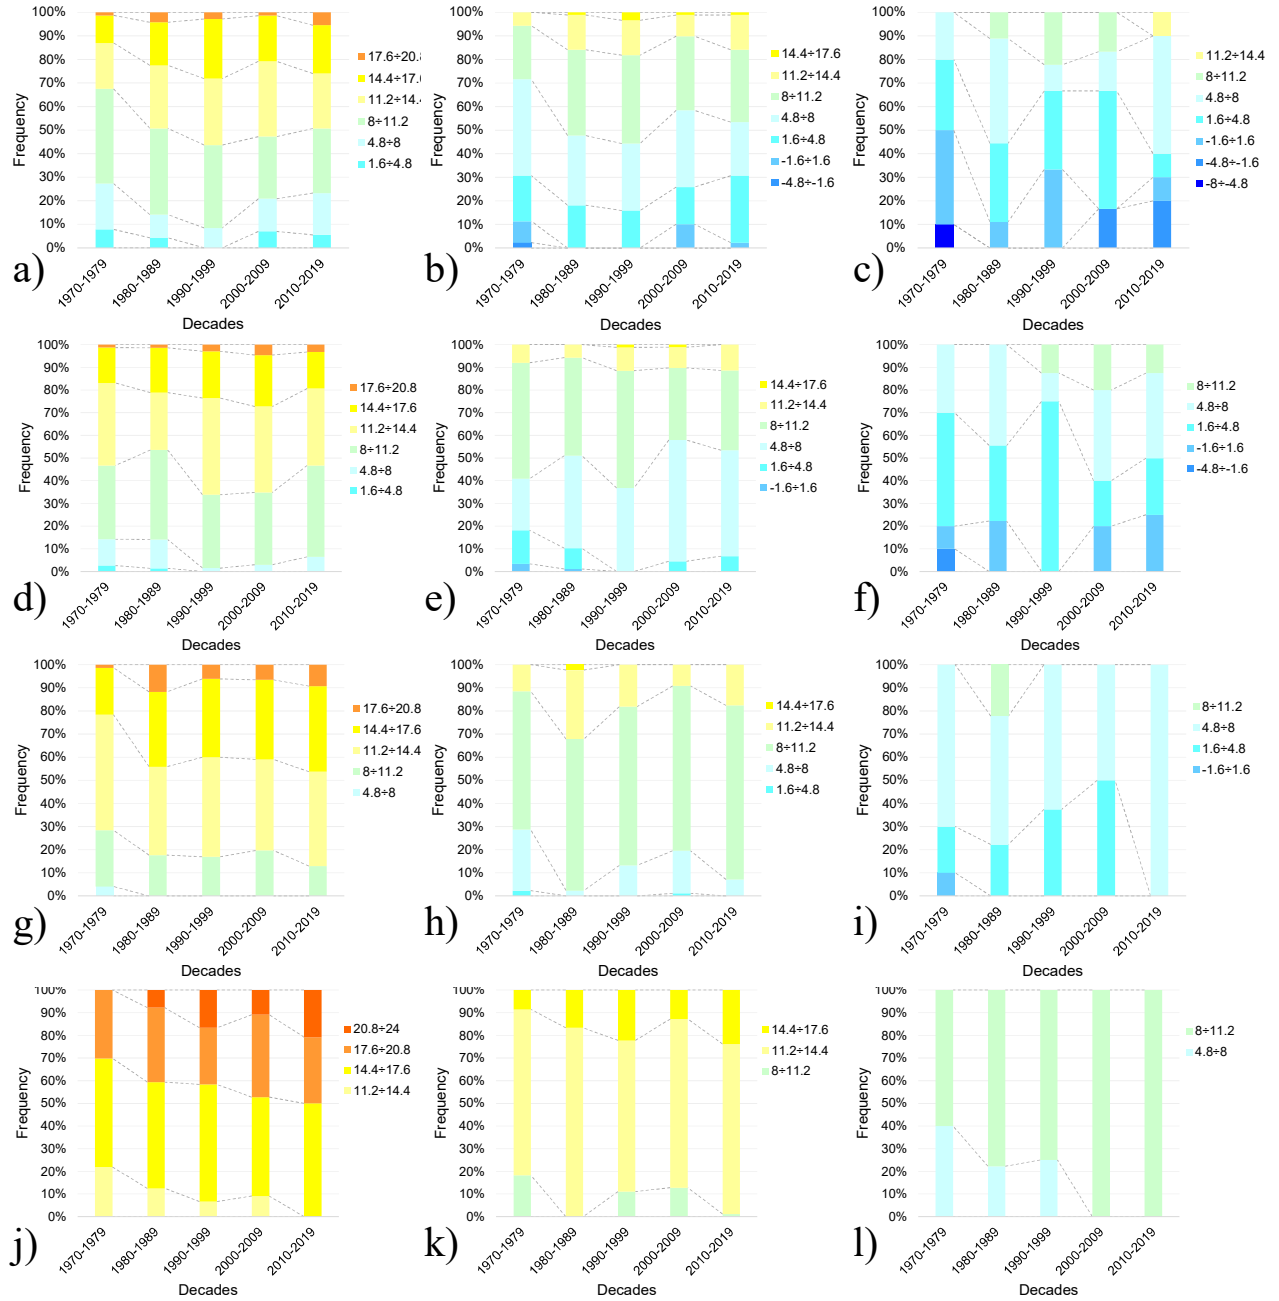

**Fig. S8** Frequency of air mean temperature during autumn season with different aggregation scale and for different altitude. (a) below 1000m and Sa=0, (b) between 1000m-2000m and Sa=0, (c) above 2000m and Sa=0, (d) below 1000m and Sa=7, (e) between 1000m-2000m and Sa=7, (f) above 2000m and Sa=7, (g) below 1000m and Sa=30, (h) between 1000m-2000m and Sa=30, (i) above 2000m and Sa=30, (j) below 1000m and Sa=90, (k) between 1000m-2000m and Sa=90, (l) above 2000m and Sa=90.

### S1.3 Temperature variation

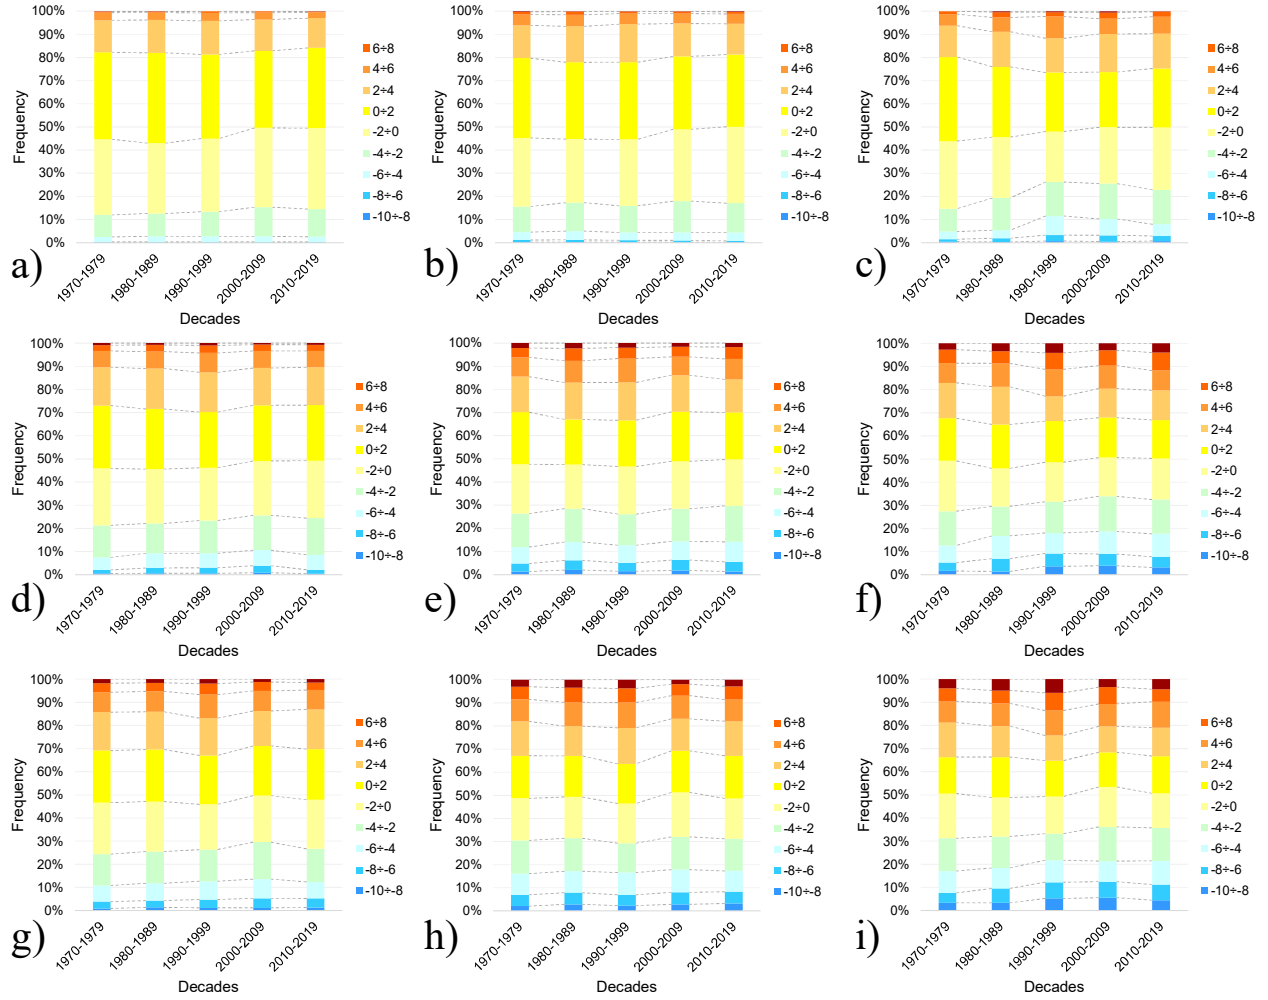

50 **Fig. S9** Frequency of temperature variation during winter season with different aggregation scale and for different altitude. (a) below 1000m and  $S_a=1$ , (b) between 1000m-2000m and  $S_a=1$ , (c) above 2000m and  $S_a=1$ , (d) below 1000m and  $S_a=3$ , (e) between 1000m-2000m and  $S_a=3$ , (f) above 2000m and  $S_a=3$ , (g) below 1000m and  $S_a=6$ , (h) between 1000m-2000m and  $S_a=6$ , (i) above 2000m and  $S_a=6$ .

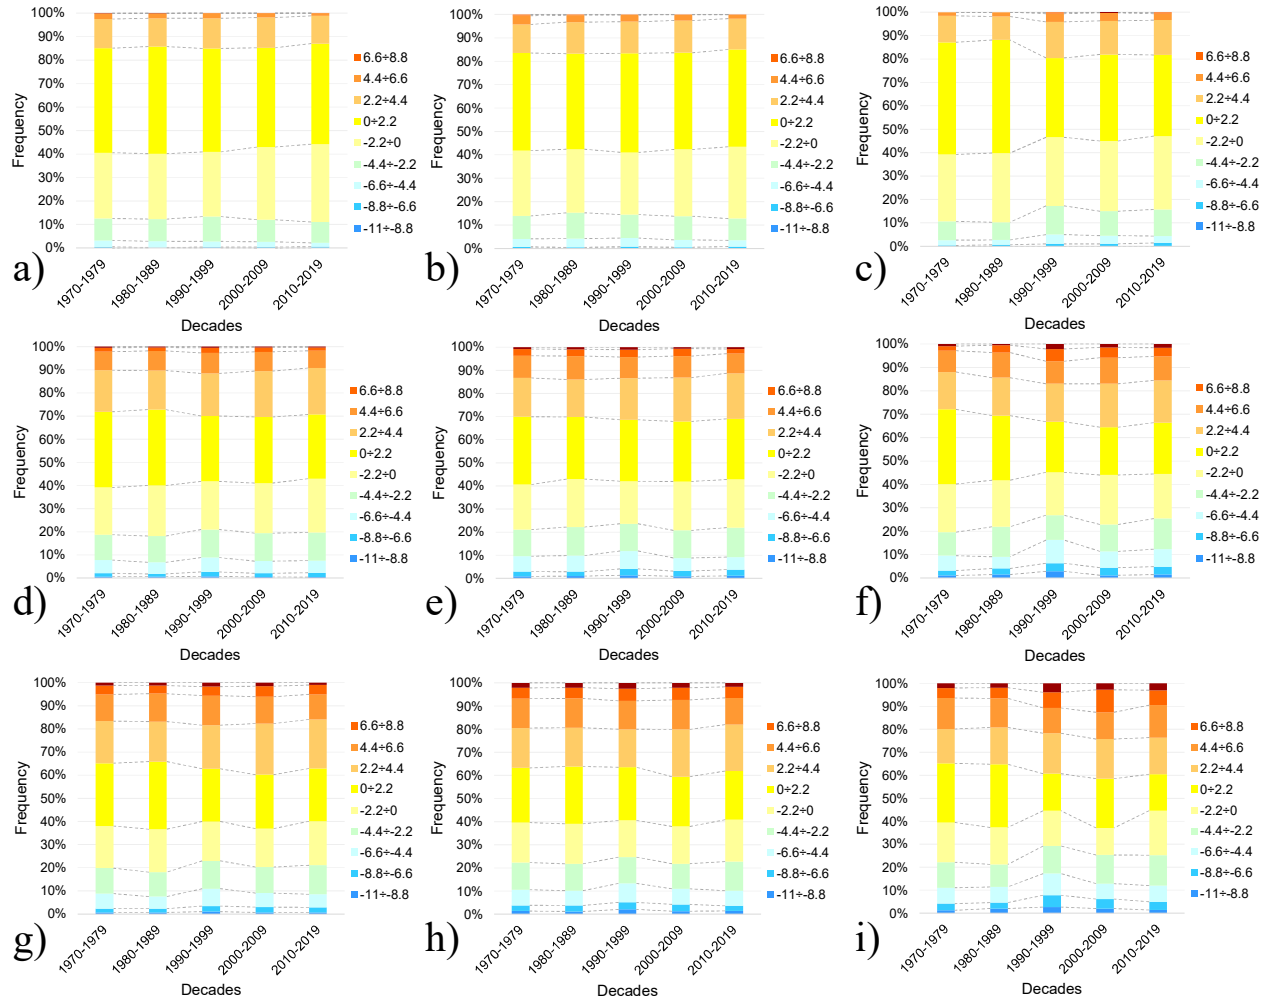

55 **Fig. S10** Frequency of temperature variation during spring season with different aggregation scale and for different altitude. (a) below 1000m and Sa=1, (b) between 1000m-2000m and Sa=1, (c) above 2000m and Sa=1, (d) below 1000m and Sa=3, (e) between 1000m-2000m and Sa=3, (f) above 2000m and Sa=3, (g) below 1000m and Sa=6, (h) between 1000m-2000m and Sa=6, (i) above 2000m and Sa=6.

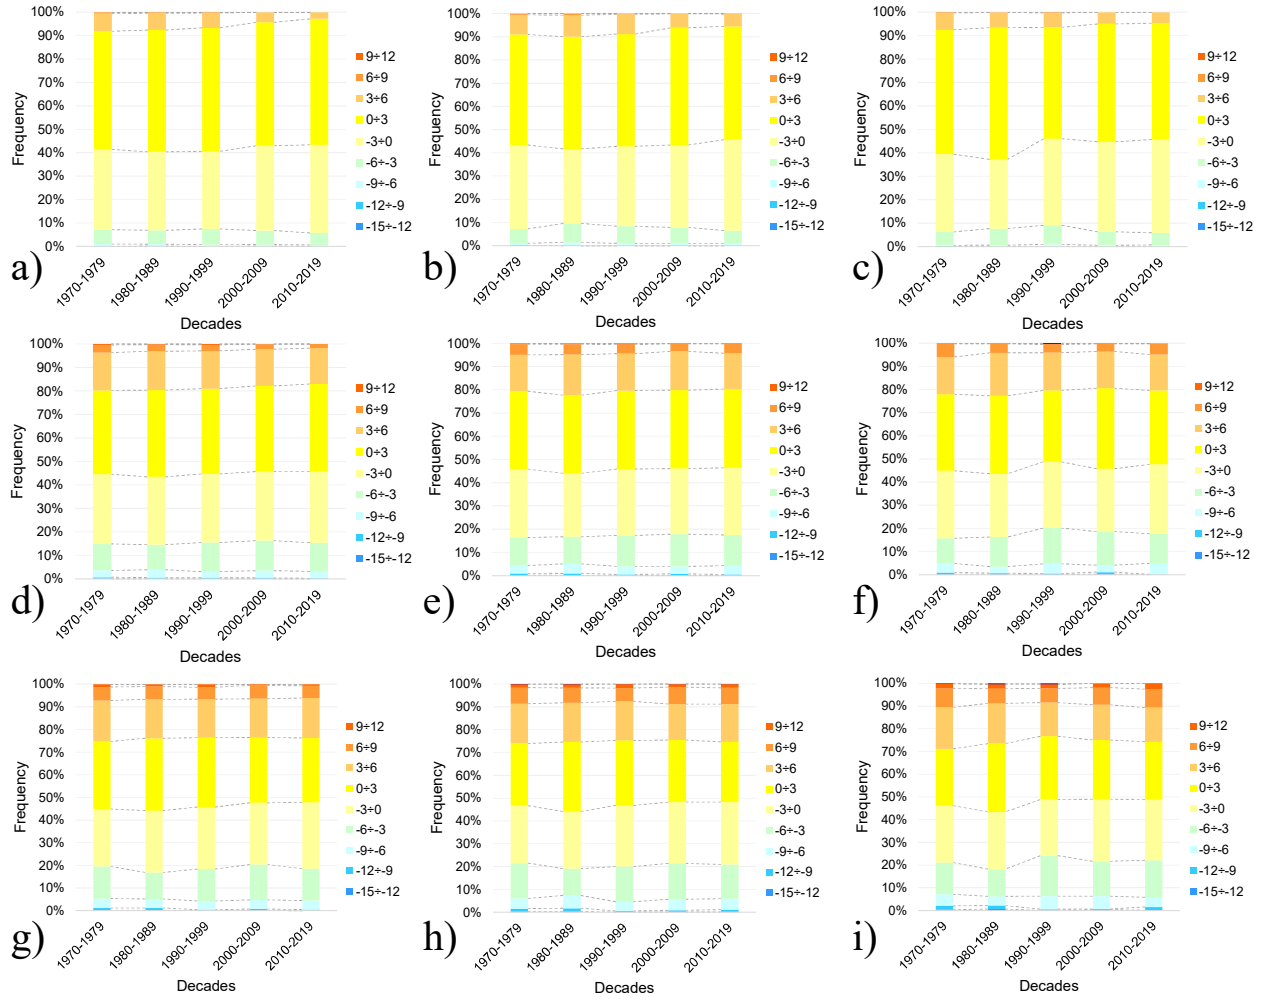

60 **Fig. S11** Frequency of temperature variation during summer season with different aggregation scale and for different altitude. (a) below 1000m and  $S_a=1$ , (b) between 1000m-2000m and  $S_a=1$ , (c) above 2000m and  $S_a=1$ , (d) below 1000m and  $S_a=3$ , (e) between 1000m-2000m and  $S_a=3$ , (f) above 2000m and  $S_a=3$ , (g) below 1000m and  $S_a=6$ , (h) between 1000m-2000m and  $S_a=6$ , (i) above 2000m and  $S_a=6$ .



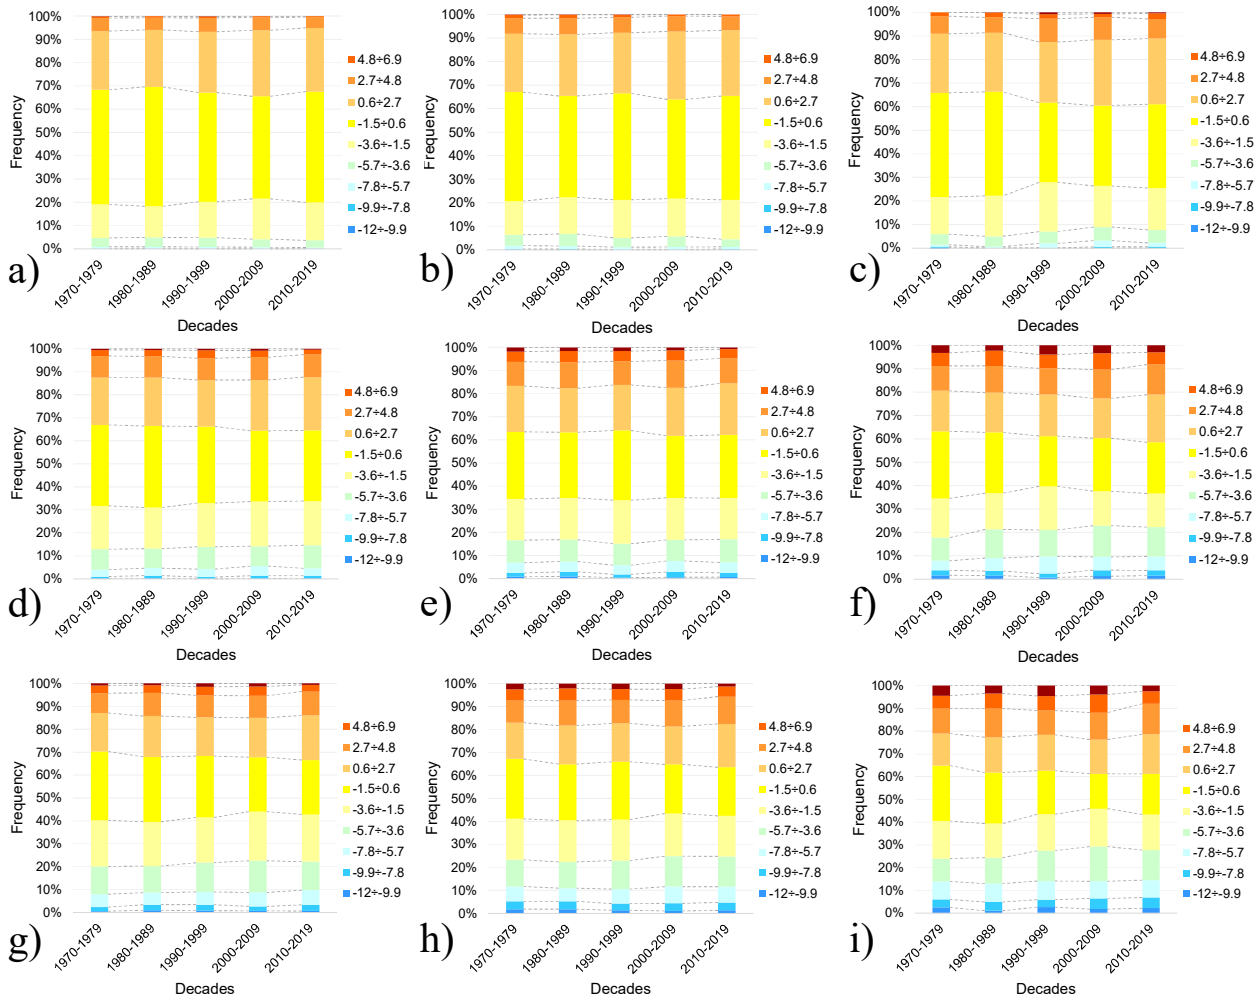

65 **Fig. S12** Frequency of temperature variation during autumn season with different aggregation scale and for different altitude. (a) below 1000m and Sa=1, (b) between 1000m-2000m and Sa=1, (c) above 2000m and Sa=1, (d) below 1000m and Sa=3, (e) between 1000m-2000m and Sa=3, (f) above 2000m and Sa=3, (g) below 1000m and Sa=6, (h) between 1000m-2000m and Sa=6, (i) above 2000m and Sa=6.

## S1.4 Temperature amplitude

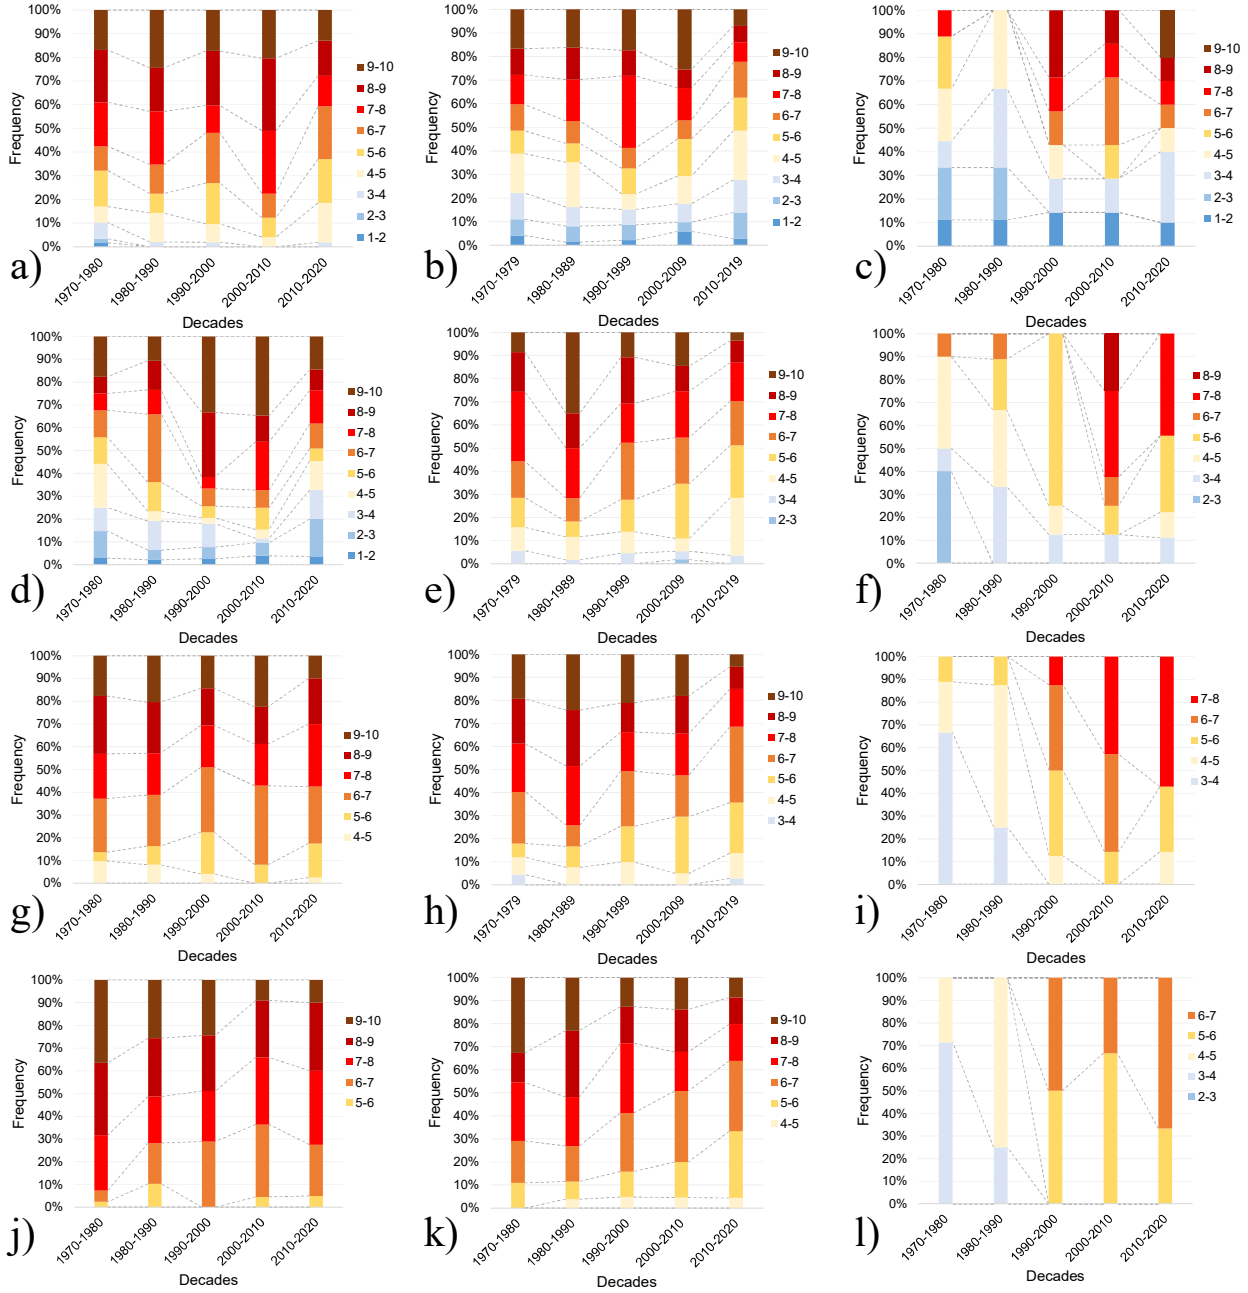

**Fig. S13** Frequency of temperature amplitude during winter season with different aggregation scale and for different altitude. (a) below 1000m and  $S_a=0$ , (b) between 1000m-2000m and  $S_a=0$ , (c) above 2000m and  $S_a=0$ , (d) below 1000m and  $S_a=7$ , (e) between 1000m-2000m and  $S_a=7$ , (f) above 2000m and  $S_a=7$ , (g) below 1000m and  $S_a=30$ , (h) between 1000m-2000m and  $S_a=30$ , (i) above 2000m and  $S_a=30$ , (j) below 1000m and  $S_a=90$ , (k) between 1000m-2000m and  $S_a=90$ , (l) above 2000m and  $S_a=90$ .

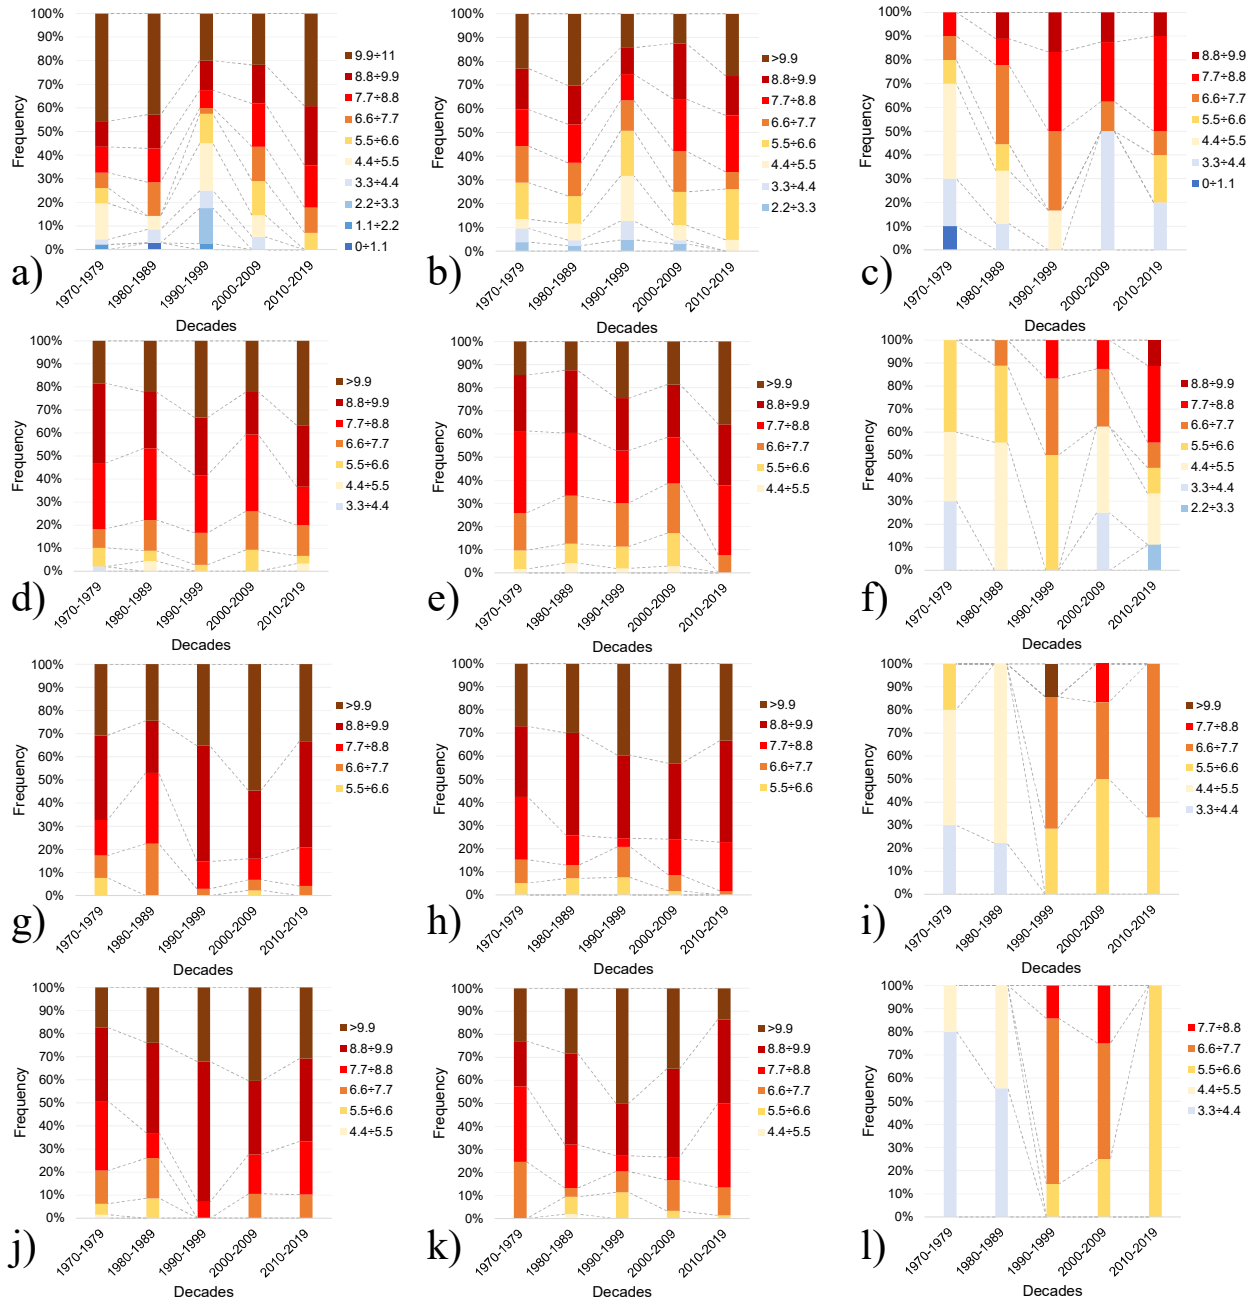

**Fig. S14** Frequency of temperature amplitude during spring season with different aggregation scale and for different altitude. (a) below 1000m and Sa=0, (b) between 1000m-2000m and Sa=0, (c) above 2000m and Sa=0, (d) below 1000m and Sa=7, (e) between 1000m-2000m and Sa=7, (f) above 2000m and Sa=7, (g) below 1000m and Sa=30, (h) between 1000m-2000m and Sa=30, (i) above 2000m and Sa=30, (j) below 1000m and Sa=90, (k) between 1000m-2000m and Sa=90, (l) above 2000m and Sa=90.

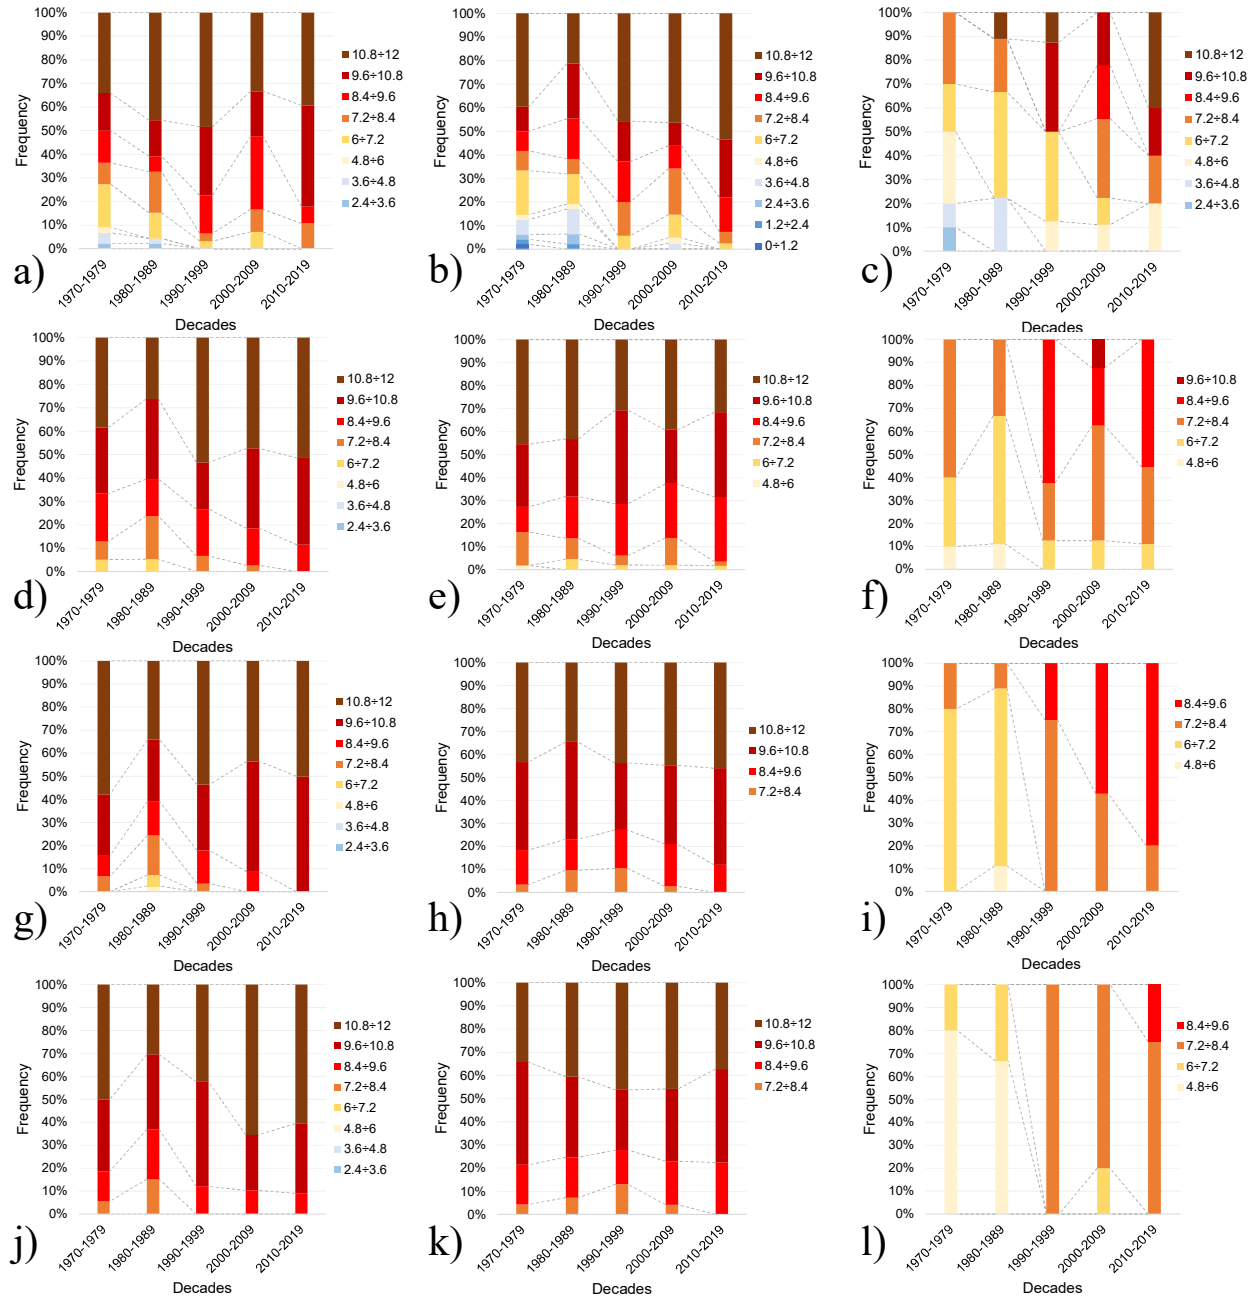

**Fig. S15** Frequency of temperature amplitude during summer season with different aggregation scale and for different altitude. (a) below 1000m and Sa=0, (b) between 1000m-2000m and Sa=0, (c) above 2000m and Sa=0, (d) below 1000m and Sa=7, (e) between 1000m-2000m and Sa=7, (f) above 2000m and Sa=7, (g) below 1000m and Sa=30, (h) between 1000m-2000m and Sa=30, (i) above 2000m and Sa=30, (j) below 1000m and Sa=90, (k) between 1000m-2000m and Sa=90, (l) above 2000m and Sa=90.

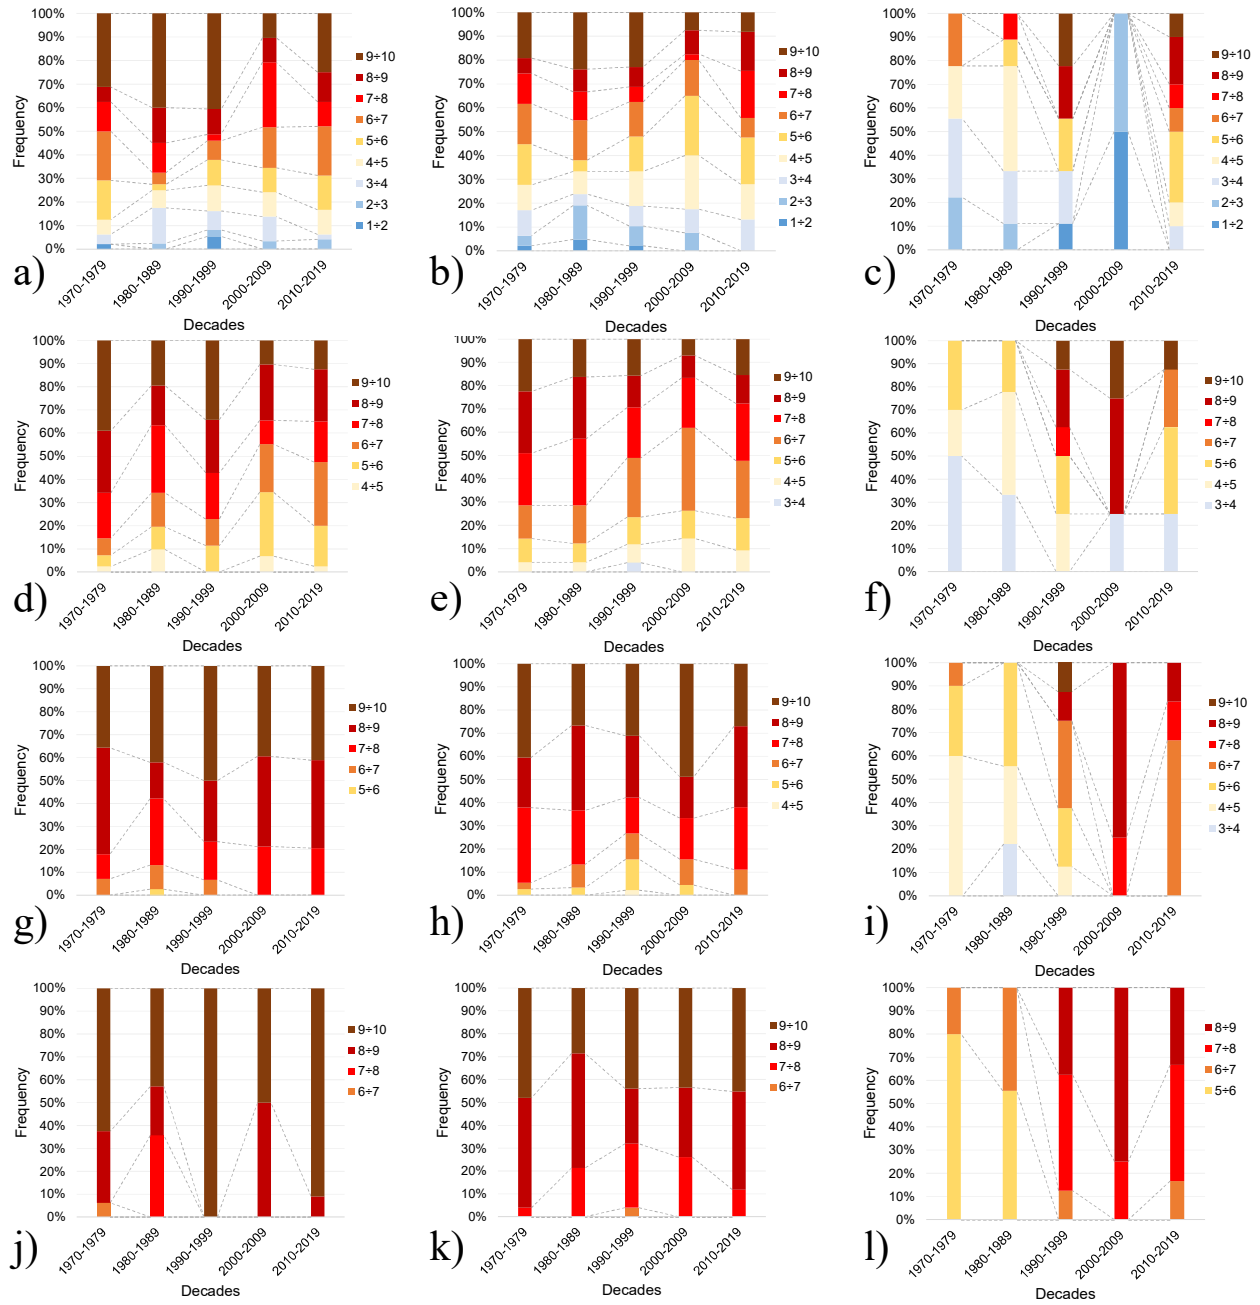

**Fig. S16** Frequency of temperature amplitude during autumn season with different aggregation scale and for different altitude. (a) below 1000m and  $S_a=0$ , (b) between 1000m-2000m and  $S_a=0$ , (c) above 2000m and  $S_a=0$ , (d) below 1000m and  $S_a=7$ , (e) between 1000m-2000m and  $S_a=7$ , (f) above 2000m and  $S_a=7$ , (g) below 1000m and  $S_a=30$ , (h) between 1000m-2000m and  $S_a=30$ , (i) above 2000m and  $S_a=30$ , (j) below 1000m and  $S_a=90$ , (k) between 1000m-2000m and  $S_a=90$ , (l) above 2000m and  $S_a=90$ .

### S1.5 Freeze-thaw

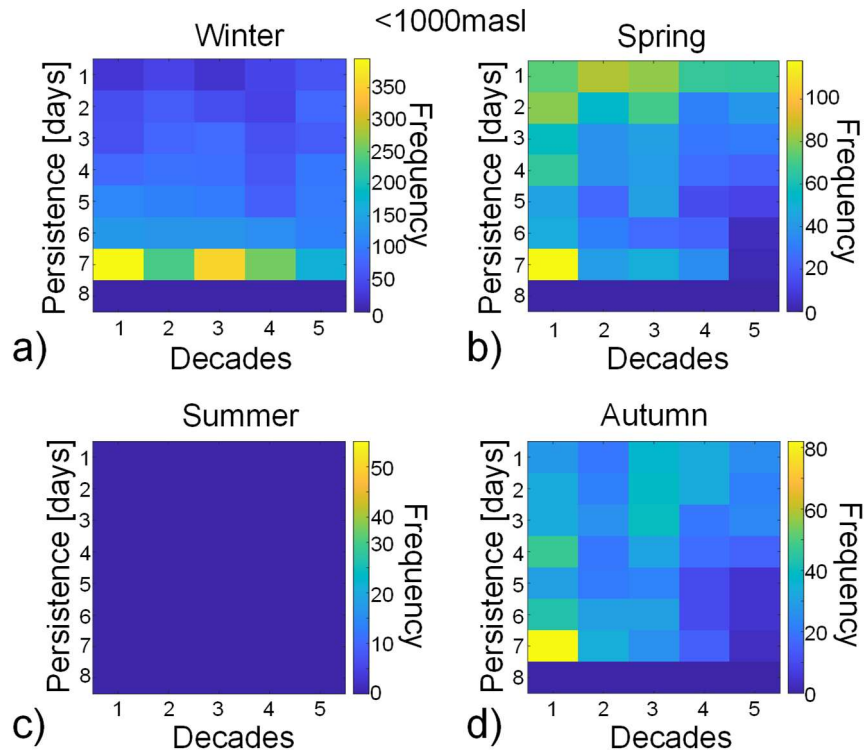

Fig. S17 Heatmaps of freeze-thaw frequency below 1000m: (a) winter; (b) spring; (c) summer and (d) autumn.

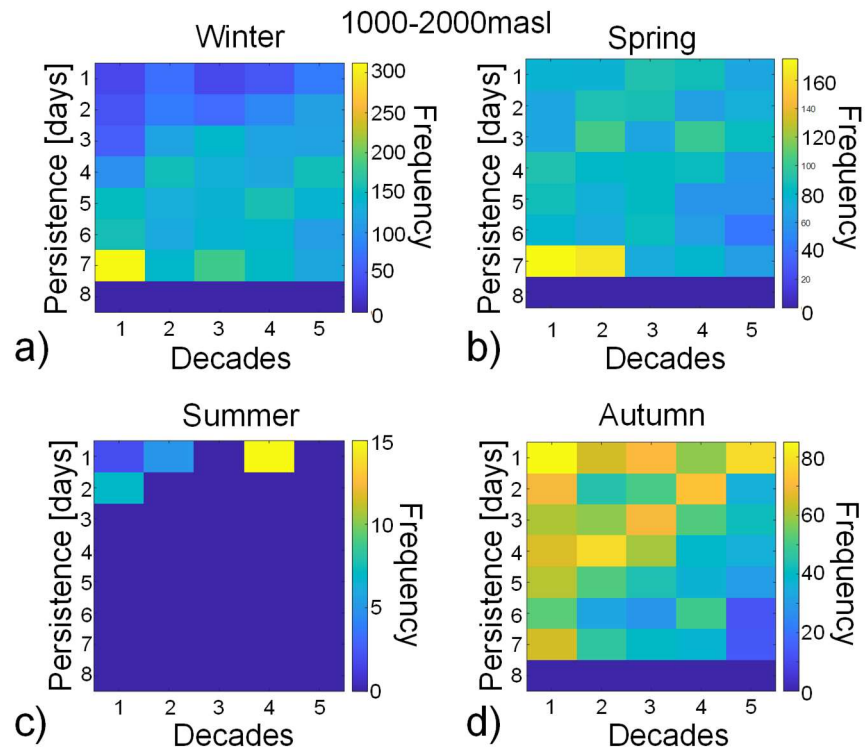

Fig. S18 Heatmaps of freeze-thaw frequency between 1000-2000m: (a) winter; (b) spring; (c) summer and (d) autumn.

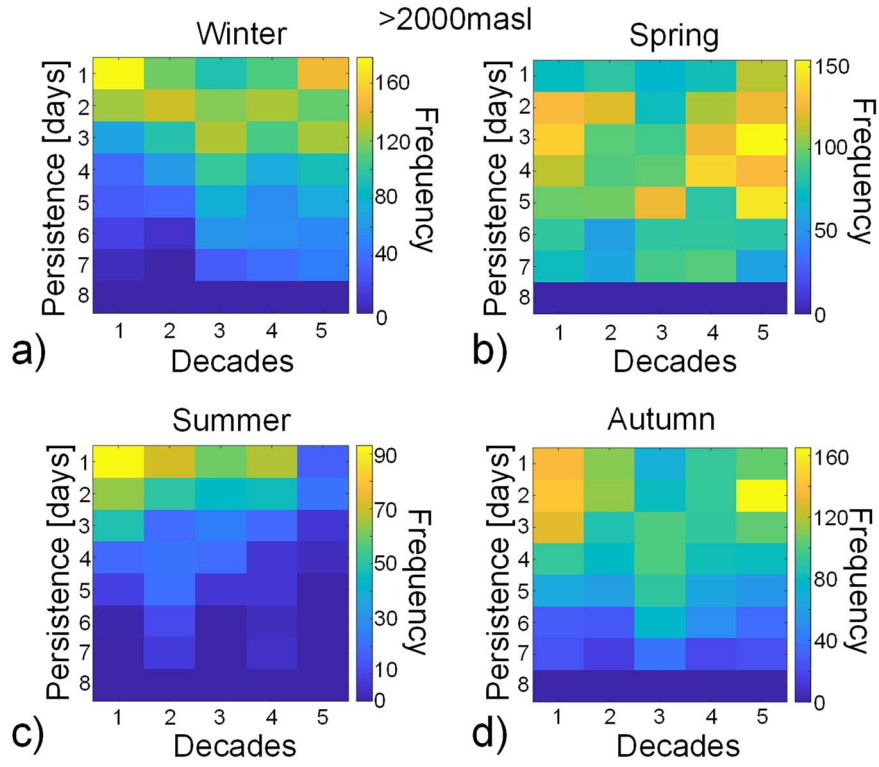

Fig. S19 Heatmaps of freeze-thaw frequency above 2000m: (a) winter; (b) spring; (c) summer and (d) autumn.

#### S1.6 Icing

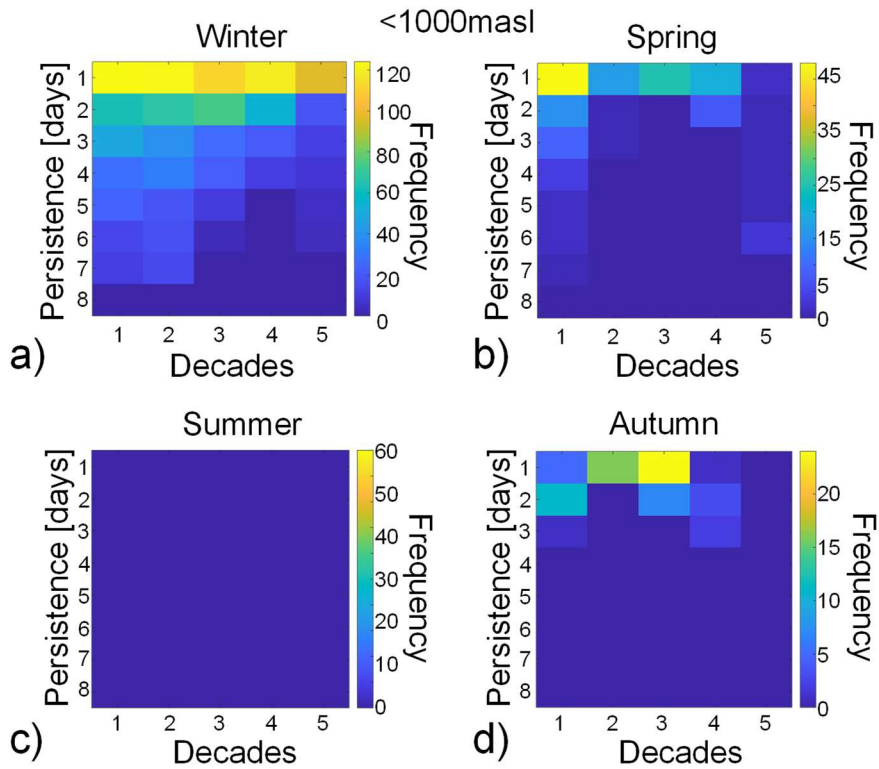

Fig. S20 Heatmaps of icing frequency below 1000m: (a) winter; (b) spring; (c) summer and (d) autumn.



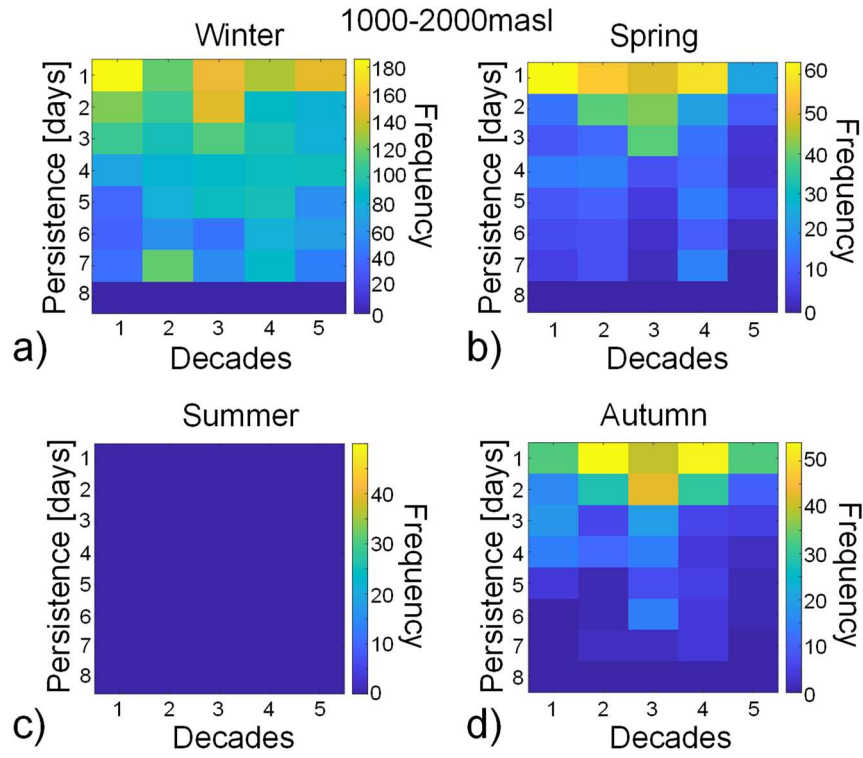

Fig. S21 Heatmaps of icing frequency between 1000-2000m: (a) winter; (b) spring; (c) summer and (d) autumn.

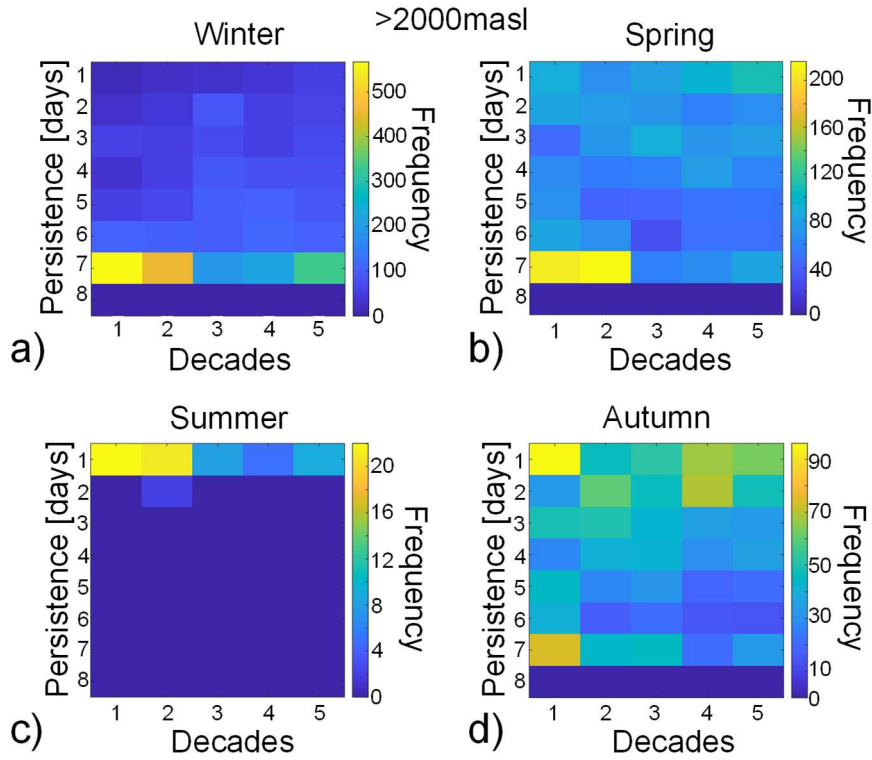

Fig. S22 Heatmaps of icing frequency above 2000m: (a) winter; (b) spring; (c) summer and (d) autumn.



## S2 Rockfalls and climate variables

### S2.1 Rainfall

|       | Rain<br>[mm] | <1000m |       |      |       |       | 1000-2000m |      |      |       |       | >2000m |   |      |   |      | P(R M) |
|-------|--------------|--------|-------|------|-------|-------|------------|------|------|-------|-------|--------|---|------|---|------|--------|
|       |              | 1      | 2     | 3    | 4     | 5     | 1          | 2    | 3    | 4     | 5     | 1      | 2 | 3    | 4 | 5    |        |
| Sa=0  | 0÷10         | 0.0%   | 0.6%  | 0.9% | 4.5%  | 4.2%  | -          | 0.1% | 0.1% | 1.3%  | 1.0%  | -      | - | 0.0% | - | 0.1% |        |
|       | 10÷20        | 0.0%   | 1.0%  | 1.0% | 3.3%  | 5.5%  | -          | 0.5% | 0.0% | 0.5%  | 1.6%  | -      | - | 0.0% | - | 0.0% |        |
|       | 20÷30        | 0.0%   | 0.0%  | 0.0% | 6.7%  | 3.8%  | -          | 0.0% | 0.0% | 4.4%  | 3.8%  | -      | - | 0.0% | - | 0.0% |        |
|       | 30÷40        | 0.0%   | 0.0%  | 0.0% | 7.3%  | 5.7%  | -          | 0.0% | 0.0% | 0.0%  | 2.9%  | -      | - | 0.0% | - | 0.0% |        |
|       | 40÷50        | 0.0%   | 27.3% | 0.0% | 5.3%  | 7.1%  | -          | 0.0% | 0.0% | 10.5% | 0.0%  | -      | - | 0.0% | - | 0.0% |        |
|       | 50÷60        | 0.0%   | 0.0%  | 0.0% | 9.1%  | 25.0% | -          | 0.0% | 0.0% | 0.0%  | 0.0%  | -      | - | 0.0% | - | 0.0% |        |
|       | 60÷70        | 0.0%   | 0.0%  | 0.0% | 0.0%  | 0.0%  | -          | 0.0% | 0.0% | 0.0%  | 0.0%  | -      | - | 0.0% | - | 0.0% |        |
|       | 70÷80        | 0.0%   | 0.0%  | 0.0% | 0.0%  | 0.0%  | -          | 0.0% | 0.0% | 0.0%  | 0.0%  | -      | - | 0.0% | - | 0.0% |        |
|       | 80÷90        | -      | 0.0%  | -    | -     | 0.0%  | -          | 0.0% | -    | -     | 0.0%  | -      | - | -    | - | 0.0% |        |
|       | 90÷100       | -      | -     | -    | -     | 0.0%  | -          | -    | -    | -     | 0.0%  | -      | - | -    | - | 0.0% |        |
| Sa=7  | 0÷25         | 0.0%   | 0.7%  | 1.1% | 4.6%  | 4.0%  | -          | 0.1% | 0.2% | 1.2%  | 0.9%  | -      | - | 0.0% | - | 0.2% |        |
|       | 25÷50        | 0.0%   | 0.1%  | 0.4% | 2.4%  | 3.0%  | -          | 0.2% | 0.0% | 0.8%  | 1.0%  | -      | - | 0.0% | - | 0.1% |        |
|       | 50÷75        | 0.3%   | 1.8%  | 0.0% | 2.5%  | 5.6%  | -          | 0.0% | 0.0% | 0.8%  | 1.3%  | -      | - | 0.0% | - | 0.0% |        |
|       | 75÷100       | 0.0%   | 1.5%  | 2.3% | 13.4% | 9.8%  | -          | 0.0% | 0.0% | 2.8%  | 2.1%  | -      | - | 0.0% | - | 0.0% |        |
|       | 100÷125      | 0.0%   | 0.0%  | 0.0% | 11.2% | 4.5%  | -          | 0.0% | 0.0% | 8.2%  | 3.0%  | -      | - | 0.0% | - | 0.0% |        |
|       | 125÷150      | 0.0%   | 4.8%  | 0.0% | 16.7% | 7.4%  | -          | 4.8% | 0.0% | 6.7%  | 3.7%  | -      | - | 0.0% | - | 0.0% |        |
|       | 150÷175      | 0.0%   | 0.0%  | 0.0% | 13.3% | 26.7% | -          | 0.0% | 0.0% | 0.0%  | 13.3% | -      | - | 0.0% | - | 0.0% |        |
|       | 175÷200      | 0.0%   | 0.0%  | 0.0% | 7.7%  | 11.1% | -          | 0.0% | 0.0% | 0.0%  | 0.0%  | -      | - | 0.0% | - | 0.0% |        |
|       | 200÷225      | 0.0%   | -     | 0.0% | 0.0%  | 0.0%  | -          | -    | 0.0% | 0.0%  | 0.0%  | -      | - | 0.0% | - | 0.0% |        |
|       | 225÷250      | -      | -     | -    | 0.0%  | 0.0%  | -          | -    | -    | 0.0%  | 0.0%  | -      | - | -    | - | 0.0% |        |
| Sa=30 | 0÷30         | 0.0%   | 1.2%  | 1.0% | 9.8%  | 4.4%  | -          | 0.2% | 0.2% | 1.4%  | 0.6%  | -      | - | 0.2% | - | 0.6% |        |
|       | 30÷60        | 0.0%   | 0.9%  | 2.3% | 5.1%  | 7.2%  | -          | 0.2% | 0.3% | 0.7%  | 1.7%  | -      | - | 0.0% | - | 0.4% |        |
|       | 60÷90        | 0.0%   | 0.5%  | 0.7% | 3.3%  | 3.0%  | -          | 0.0% | 0.2% | 0.9%  | 0.9%  | -      | - | 0.0% | - | 0.0% |        |
|       | 90÷120       | 0.0%   | 0.7%  | 0.4% | 3.0%  | 2.2%  | -          | 0.2% | 0.0% | 0.9%  | 1.0%  | -      | - | 0.0% | - | 0.0% |        |
|       | 120÷150      | 0.0%   | 0.6%  | 0.4% | 4.3%  | 1.5%  | -          | 0.3% | 0.0% | 2.1%  | 0.0%  | -      | - | 0.0% | - | 0.0% |        |
|       | 150÷180      | 0.0%   | 0.9%  | 0.0% | 1.1%  | 3.7%  | -          | 0.0% | 0.0% | 1.4%  | 1.7%  | -      | - | 0.0% | - | 0.0% |        |
|       | 180÷210      | 0.0%   | 0.0%  | 0.6% | 1.7%  | 3.5%  | -          | 0.0% | 0.0% | 0.8%  | 0.5%  | -      | - | 0.0% | - | 0.0% |        |
|       | 210÷240      | 1.6%   | 0.0%  | 0.0% | 5.6%  | 4.7%  | -          | 0.0% | 0.0% | 3.3%  | 0.8%  | -      | - | 0.0% | - | 0.0% |        |
|       | 240÷270      | 0.0%   | 0.0%  | 1.3% | 7.9%  | 7.8%  | -          | 0.0% | 0.0% | 3.2%  | 2.0%  | -      | - | 0.0% | - | 0.0% |        |
|       | 270÷300      | 0.0%   | 0.0%  | 0.0% | 11.4% | 27.6% | -          | 0.0% | 0.0% | 0.0%  | 3.4%  | -      | - | 0.0% | - | 0.0% |        |
| Sa=90 | 0÷55         | -      | 2.2%  | 0.0% | 10.8% | 0.0%  | -          | 0.0% | 0.0% | 2.7%  | 10.0% | -      | - | 0.0% | - | 0.0% |        |
|       | 55÷110       | 0.0%   | 1.4%  | 4.1% | 2.6%  | 3.9%  | -          | 0.0% | 0.4% | 0.0%  | 0.8%  | -      | - | 0.0% | - | 0.8% |        |
|       | 110÷165      | 0.0%   | 0.8%  | 0.8% | 5.4%  | 2.6%  | -          | 0.0% | 0.2% | 0.5%  | 1.5%  | -      | - | 0.2% | - | 0.0% |        |
|       | 165÷220      | 0.0%   | 1.1%  | 0.5% | 6.3%  | 2.7%  | -          | 0.2% | 0.2% | 0.7%  | 0.0%  | -      | - | 0.0% | - | 0.4% |        |
|       | 220÷275      | 0.0%   | 0.9%  | 0.2% | 3.7%  | 2.3%  | -          | 0.0% | 0.0% | 2.4%  | 0.8%  | -      | - | 0.0% | - | 0.0% |        |
|       | 275÷330      | 0.0%   | 0.6%  | 0.9% | 1.9%  | 3.1%  | -          | 0.2% | 0.0% | 0.7%  | 0.5%  | -      | - | 0.0% | - | 0.2% |        |
|       | 330÷385      | 0.0%   | 0.1%  | 0.5% | 0.9%  | 0.8%  | -          | 0.1% | 0.2% | 0.5%  | 0.6%  | -      | - | 0.0% | - | 0.0% |        |
|       | 385÷440      | 0.3%   | 0.2%  | 0.6% | 3.8%  | 3.4%  | -          | 0.0% | 0.0% | 1.1%  | 0.6%  | -      | - | 0.0% | - | 0.2% |        |
|       | 440÷495      | 0.0%   | 0.5%  | 0.7% | 1.5%  | 4.7%  | -          | 0.0% | 0.0% | 0.0%  | 1.5%  | -      | - | 0.0% | - | 0.0% |        |
|       | 495÷550      | 0.0%   | 0.0%  | 0.8% | 2.6%  | 6.2%  | -          | 6.7% | 0.0% | 4.3%  | 0.6%  | -      | - | 0.0% | - | 0.0% |        |

a)

|       | Rain<br>[mm] | <1000m |      |      |       |       | 1000-2000m |       |      |       |       | >2000m |   |      |      |       | P(R M) |
|-------|--------------|--------|------|------|-------|-------|------------|-------|------|-------|-------|--------|---|------|------|-------|--------|
|       |              | 1      | 2    | 3    | 4     | 5     | 1          | 2     | 3    | 4     | 5     | 1      | 2 | 3    | 4    | 5     |        |
| Sa=0  | 0÷5          | 0.1%   | 0.5% | 0.8% | 3.4%  | 4.3%  | 0.1%       | 0.2%  | 0.5% | 2.3%  | 2.7%  | -      | - | 0.0% | 0.2% | 0.2%  |        |
|       | 5÷10         | 0.0%   | 0.3% | 1.6% | 5.9%  | 6.9%  | 0.0%       | 0.0%  | 0.3% | 3.4%  | 8.0%  | -      | - | 0.0% | 0.0% | 1.1%  |        |
|       | 10÷15        | 0.0%   | 0.0% | 1.5% | 9.2%  | 3.8%  | 0.0%       | 0.0%  | 1.5% | 2.3%  | 1.3%  | -      | - | 0.0% | 0.0% | 0.0%  |        |
|       | 15÷20        | 0.0%   | 0.0% | 3.3% | 4.9%  | 6.3%  | 1.4%       | 1.5%  | 0.0% | 3.7%  | 2.1%  | -      | - | 0.0% | 0.0% | 0.0%  |        |
|       | 20÷25        | 1.8%   | 0.0% | 5.6% | 0.0%  | 4.3%  | 0.0%       | 0.0%  | 2.8% | 1.9%  | 4.3%  | -      | - | 0.0% | 0.0% | 0.0%  |        |
|       | 25÷30        | 0.0%   | 0.0% | 0.0% | 8.3%  | 0.0%  | 0.0%       | 0.0%  | 0.0% | 5.6%  | 6.1%  | -      | - | 0.0% | 0.0% | 0.0%  |        |
|       | 30÷35        | 0.0%   | 0.0% | 0.0% | 3.6%  | 4.2%  | 0.0%       | 0.0%  | 0.0% | 0.0%  | 4.2%  | -      | - | 0.0% | 0.0% | 0.0%  |        |
|       | 35÷40        | 0.0%   | 0.0% | 0.0% | 7.7%  | 9.1%  | 0.0%       | 0.0%  | 0.0% | 0.0%  | 27.3% | -      | - | 0.0% | 0.0% | 0.0%  |        |
|       | 40÷45        | 0.0%   | 0.0% | 0.0% | 8.3%  | 14.3% | 0.0%       | 14.3% | 0.0% | 0.0%  | 14.3% | -      | - | 0.0% | 0.0% | 14.3% |        |
|       | 45÷50        | 0.0%   | 0.0% | 0.0% | 0.0%  | 0.0%  | 0.0%       | 0.0%  | 0.0% | 0.0%  | 14.3% | -      | - | 0.0% | 0.0% | 0.0%  |        |
| Sa=7  | 0÷15         | 0.2%   | 0.2% | 0.6% | 2.6%  | 3.7%  | 0.1%       | 0.1%  | 0.6% | 1.4%  | 2.4%  | -      | - | 0.0% | 0.1% | 0.1%  |        |
|       | 15÷30        | 0.0%   | 0.7% | 0.9% | 4.4%  | 4.3%  | 0.1%       | 0.0%  | 0.2% | 3.0%  | 2.5%  | -      | - | 0.1% | 0.1% | 0.8%  |        |
|       | 30÷45        | 0.0%   | 0.2% | 2.2% | 5.1%  | 4.6%  | 0.2%       | 0.4%  | 0.7% | 2.7%  | 3.8%  | -      | - | 0.0% | 0.2% | 0.2%  |        |
|       | 45÷60        | 0.0%   | 0.4% | 0.8% | 4.4%  | 8.5%  | 0.0%       | 0.7%  | 0.4% | 4.8%  | 6.0%  | -      | - | 0.0% | 0.0% | 0.3%  |        |
|       | 60÷75        | 0.0%   | 2.1% | 2.1% | 6.0%  | 2.5%  | 0.0%       | 0.7%  | 0.7% | 2.2%  | 2.0%  | -      | - | 0.0% | 0.0% | 0.5%  |        |
|       | 75÷90        | 1.0%   | 1.2% | 3.0% | 6.0%  | 5.3%  | 0.0%       | 0.0%  | 1.0% | 2.0%  | 4.3%  | -      | - | 0.0% | 1.0% | 1.1%  |        |
|       | 90÷105       | 0.0%   | 1.5% | 0.0% | 7.8%  | 5.4%  | 0.0%       | 1.5%  | 0.0% | 9.4%  | 8.1%  | -      | - | 0.0% | 0.0% | 0.0%  |        |
|       | 105÷120      | 0.0%   | 0.0% | 0.0% | 6.7%  | 7.9%  | 0.0%       | 0.0%  | 0.0% | 5.0%  | 10.5% | -      | - | 0.0% | 0.0% | 2.6%  |        |
|       | 120÷135      | 0.0%   | 0.0% | 6.7% | 0.0%  | 17.6% | 0.0%       | 0.0%  | 6.7% | 0.0%  | 23.5% | -      | - | 0.0% | 0.0% | 0.0%  |        |
|       | 135÷150      | 0.0%   | 0.0% | 0.0% | 0.0%  | 14.3% | 0.0%       | 0.0%  | 0.0% | 0.0%  | 7.1%  | -      | - | 0.0% | 0.0% | 0.0%  |        |
| Sa=30 | 0÷20         | 0.0%   | 0.0% | 0.6% | 2.2%  | 2.1%  | 0.0%       | 0.0%  | 1.5% | 3.0%  | 0.5%  | -      | - | 0.0% | 0.0% | 0.0%  |        |
|       | 20÷40        | 0.4%   | 0.9% | 0.3% | 4.4%  | 3.7%  | 0.0%       | 0.0%  | 0.0% | 1.2%  | 4.0%  | -      | - | 0.0% | 0.0% | 0.3%  |        |
|       | 40÷60        | 0.0%   | 0.2% | 0.8% | 5.3%  | 9.3%  | 0.2%       | 0.5%  | 0.0% | 2.8%  | 3.4%  | -      | - | 0.0% | 0.0% | 0.3%  |        |
|       | 60÷80        | 0.0%   | 0.2% | 1.8% | 4.4%  | 5.4%  | 0.0%       | 0.0%  | 0.5% | 1.9%  | 3.5%  | -      | - | 0.0% | 0.3% | 0.3%  |        |
|       | 80÷100       | 0.4%   | 0.0% | 1.4% | 4.6%  | 4.6%  | 0.2%       | 0.0%  | 0.5% | 2.7%  | 3.3%  | -      | - | 0.0% | 0.4% | 0.2%  |        |
|       | 100÷120      | 0.2%   | 0.5% | 0.9% | 4.0%  | 3.4%  | 0.0%       | 0.2%  | 0.5% | 3.2%  | 4.1%  | -      | - | 0.0% | 0.0% | 0.6%  |        |
|       | 120÷140      | 0.0%   | 1.1% | 0.9% | 3.4%  | 6.2%  | 0.0%       | 0.4%  | 0.3% | 1.8%  | 4.8%  | -      | - | 0.0% | 0.0% | 0.2%  |        |
|       | 140÷160      | 0.0%   | 0.3% | 1.7% | 3.8%  | 4.8%  | 0.3%       | 0.3%  | 0.4% | 2.4%  | 3.1%  | -      | - | 0.4% | 0.3% | 0.3%  |        |
|       | 160÷180      | 0.0%   | 0.0% | 2.5% | 5.5%  | 3.0%  | 0.0%       | 0.0%  | 2.5% | 4.1%  | 3.0%  | -      | - | 0.0% | 0.0% | 0.4%  |        |
|       | 180÷200      | 0.0%   | 0.0% | 0.8% | 3.3%  | 3.8%  | 0.0%       | 0.0%  | 0.8% | 3.3%  | 1.5%  | -      | - | 0.0% | 0.0% | 0.0%  |        |
| Sa=90 | 0÷45         | -      | -    | 0.0% | 25.0% | -     | -          | -     | 1.9% | 12.5% | -     | -      | - | 0.0% | 0.0% | -     |        |
|       | 45÷90        | 0.0%   | 0.7% | 1.6% | 3.9%  | 7.8%  | 0.0%       | 0.0%  | 0.5% | 2.4%  | 7.8%  | -      | - | 0.0% | 0.0% | 0.0%  |        |
|       | 90÷135       | 0.0%   | 0.7% | 2.1% | 11.7% | 6.3%  | 0.0%       | 0.0%  | 2.5% | 7.4%  | 3.8%  | -      | - | 0.0% | 0.0% | 0.6%  |        |
|       | 135÷180      | 0.4%   | 0.7% | 2.6% | 10.0% | 12.2% | 0.0%       | 0.2%  | 0.4% | 5.0%  | 5.5%  | -      | - | 0.0% | 0.4% | 0.6%  |        |
|       | 180÷225      | 0.3%   | 0.4% | 2.0% | 9.8%  | 11.0% | 0.0%       | 0.2%  | 1.4% | 6.3%  | 7.9%  | -      | - | 0.0% | 0.4% | 0.8%  |        |
|       | 225÷270      | 0.0%   | 0.6% | 1.4% | 5.3%  | 10.6% | 0.4%       | 0.2%  | 0.6% | 3.6%  | 7.3%  | -      | - | 0.0% | 0.0% | 1.3%  |        |
|       | 270÷315      | 0.2%   | 0.7% | 0.7% | 2.5%  | 4.7%  | 0.0%       | 0.5%  | 0.7% | 1.7%  | 3.4%  | -      | - | 0.0% | 0.4% | 0.2%  |        |
|       | 315÷360      | 0.2%   | 0.5% | 0.2% | 3.1%  | 1.8%  | 0.0%       | 0.0%  | 0.0% | 1.6%  | 2.8%  | -      | - | 0.0% | 0.0% | 0.0%  |        |
|       | 360÷405      | 0.0%   | 0.2% | 0.0% | 0.7%  | 1.6%  | 0.0%       | 0.3%  | 0.0% | 1.0%  | 0.6%  | -      | - | 0.2% | 0.0% | 0.2%  |        |
|       | 405÷450      | 0.0%   | 0.0% | 0.0% | 2.8%  | 1.1%  | 0.0%       | 0.3%  | 0.0% | 1.9%  | 1.4%  | -      | - | 0.0% | 0.3% | 0.3%  |        |

b)

| Rain<br>[mm] |         | <1000m |      |       |       |      | 1000-2000m |      |      |       |      | >2000m |      |      |      |      | P(R M) |
|--------------|---------|--------|------|-------|-------|------|------------|------|------|-------|------|--------|------|------|------|------|--------|
|              |         | 1      | 2    | 3     | 4     | 5    | 1          | 2    | 3    | 4     | 5    | 1      | 2    | 3    | 4    | 5    |        |
| Sa=0         | 0÷6     | 0.1%   | 0.4% | 0.9%  | 2.7%  | 2.7% | 0.0%       | 0.2% | 0.5% | 2.0%  | 2.3% | -      | 0.1% | 0.2% | 0.6% | 1.0% |        |
|              | 6÷12    | 0.0%   | 1.5% | 0.7%  | 7.2%  | 6.3% | 0.0%       | 0.4% | 0.7% | 4.1%  | 4.3% | -      | 0.0% | 0.0% | 0.7% | 1.4% |        |
|              | 12÷18   | 0.0%   | 0.0% | 2.0%  | 7.3%  | 7.7% | 0.0%       | 0.0% | 1.0% | 4.8%  | 4.2% | -      | 0.0% | 0.0% | 2.4% | 1.4% |        |
|              | 18÷24   | 0.0%   | 2.9% | 1.7%  | 6.3%  | 1.5% | 0.0%       | 0.0% | 0.0% | 3.8%  | 7.4% | -      | 0.0% | 0.0% | 0.0% | 1.5% |        |
|              | 24÷30   | 0.0%   | 2.6% | 0.0%  | 6.7%  | 4.8% | 0.0%       | 0.0% | 3.1% | 11.1% | 2.4% | -      | 0.0% | 3.1% | 0.0% | 2.4% |        |
|              | 30÷36   | 0.0%   | 0.0% | 0.0%  | 3.3%  | 0.0% | 0.0%       | 0.0% | 5.3% | 0.0%  | 7.7% | -      | 0.0% | 0.0% | 0.0% | 0.0% |        |
|              | 36÷42   | 0.0%   | 0.0% | 16.7% | 11.8% | 0.0% | 14.3%      | 0.0% | 0.0% | 0.0%  | 0.0% | -      | 0.0% | 0.0% | 0.0% | 0.0% |        |
|              | 42÷48   | 0.0%   | 0.0% | 10.0% | 0.0%  | 0.0% | 0.0%       | 0.0% | 0.0% | 0.0%  | 0.0% | -      | 0.0% | 0.0% | 0.0% | 0.0% |        |
|              | 48÷54   | 0.0%   | 0.0% | 0.0%  | 0.0%  | 0.0% | 0.0%       | 0.0% | 0.0% | 0.0%  | 0.0% | -      | 0.0% | 0.0% | 0.0% | 0.0% |        |
|              | 54÷60   | 0.0%   | -    | 0.0%  | 0.0%  | 0.0% | 0.0%       | -    | 0.0% | 0.0%  | 0.0% | -      | -    | 0.0% | 0.0% | 0.0% |        |
| Sa=7         | 0÷13    | 0.1%   | 0.1% | 0.1%  | 0.8%  | 0.6% | 0.0%       | 0.1% | 0.2% | 0.6%  | 0.7% | -      | 0.0% | 0.0% | 0.3% | 0.4% |        |
|              | 13÷26   | 0.0%   | 0.3% | 0.4%  | 2.8%  | 3.0% | 0.0%       | 0.7% | 0.7% | 2.8%  | 4.1% | -      | 0.1% | 0.1% | 1.0% | 2.2% |        |
|              | 26÷39   | 0.0%   | 1.0% | 1.7%  | 5.0%  | 7.1% | 0.0%       | 0.0% | 0.6% | 2.7%  | 2.9% | -      | 0.2% | 0.0% | 0.7% | 1.7% |        |
|              | 39÷52   | 0.0%   | 1.5% | 3.4%  | 7.3%  | 5.1% | 0.0%       | 0.0% | 0.8% | 4.2%  | 4.0% | -      | 0.0% | 0.8% | 1.2% | 1.2% |        |
|              | 52÷65   | 0.5%   | 0.5% | 2.9%  | 9.9%  | 4.0% | 0.0%       | 0.0% | 0.6% | 9.4%  | 3.6% | -      | 0.0% | 0.6% | 1.5% | 1.1% |        |
|              | 65÷78   | 0.8%   | 1.9% | 3.5%  | 11.1% | 6.1% | 0.8%       | 0.9% | 1.7% | 8.3%  | 7.6% | -      | 0.0% | 0.0% | 0.7% | 0.8% |        |
|              | 78÷91   | 0.0%   | 0.0% | 0.0%  | 2.5%  | 7.5% | 0.0%       | 1.6% | 3.8% | 1.3%  | 5.0% | -      | 0.0% | 1.3% | 1.3% | 1.3% |        |
|              | 91÷104  | 0.0%   | 3.4% | 3.3%  | 1.9%  | 4.7% | 0.0%       | 1.7% | 0.0% | 0.0%  | 3.1% | -      | 0.0% | 3.3% | 0.0% | 1.6% |        |
|              | 104÷117 | 0.0%   | 2.9% | 10.0% | 5.4%  | 5.6% | 0.0%       | 0.0% | 0.0% | 0.0%  | 5.6% | -      | 0.0% | 0.0% | 0.0% | 0.0% |        |
|              | 117÷130 | 0.0%   | 0.0% | 0.0%  | 2.9%  | 0.0% | 0.0%       | 0.0% | 0.0% | 2.9%  | 0.0% | -      | 0.0% | 0.0% | 0.0% | 0.0% |        |
| Sa=30        | 0÷30    | 0.0%   | 0.0% | 0.0%  | 0.0%  | 0.0% | 0.0%       | 0.0% | 0.0% | 0.0%  | 0.0% | -      | 0.0% | 0.0% | 0.0% | 0.0% |        |
|              | 30÷60   | 0.0%   | 0.0% | 0.0%  | 0.4%  | 0.0% | 0.0%       | 0.0% | 0.5% | 1.3%  | 0.2% | -      | 0.0% | 0.0% | 0.0% | 0.0% |        |
|              | 60÷90   | 0.0%   | 0.3% | 0.2%  | 2.8%  | 2.1% | 0.0%       | 0.0% | 1.0% | 2.1%  | 2.1% | -      | 0.2% | 0.2% | 0.9% | 1.1% |        |
|              | 90÷120  | 0.4%   | 0.7% | 1.6%  | 3.6%  | 3.8% | 0.0%       | 0.0% | 0.4% | 1.8%  | 3.7% | -      | 0.0% | 0.3% | 0.4% | 1.8% |        |
|              | 120÷150 | 0.0%   | 0.9% | 1.6%  | 3.9%  | 6.3% | 0.1%       | 0.9% | 1.2% | 2.8%  | 4.9% | -      | 0.0% | 0.4% | 1.3% | 1.8% |        |
|              | 150÷180 | 0.0%   | 1.9% | 2.9%  | 9.5%  | 5.7% | 0.0%       | 0.9% | 0.5% | 5.7%  | 2.5% | -      | 0.3% | 0.0% | 1.1% | 1.5% |        |
|              | 180÷210 | 0.0%   | 0.7% | 3.7%  | 5.8%  | 3.0% | 0.0%       | 0.0% | 0.0% | 7.5%  | 3.5% | -      | 0.0% | 0.6% | 0.8% | 2.5% |        |
|              | 210÷240 | 0.0%   | 0.0% | 1.0%  | 7.8%  | 9.4% | 0.0%       | 0.0% | 1.0% | 5.6%  | 8.7% | -      | 0.0% | 0.0% | 1.1% | 0.0% |        |
|              | 240÷270 | 0.0%   | 0.0% | 1.3%  | 1.6%  | 0.0% | 0.0%       | 0.0% | 0.0% | 3.2%  | 3.9% | -      | 0.0% | 0.0% | 0.0% | 0.0% |        |
|              | 270÷300 | 0.0%   | 0.0% | 0.0%  | 0.0%  | 0.0% | 0.0%       | 0.0% | 0.0% | 0.0%  | 0.0% | -      | 0.0% | 0.0% | 0.0% | 0.0% |        |
| Sa=90        | 0÷70    | 0.0%   | 0.0% | 0.0%  | 0.0%  | 0.0% | 0.0%       | 0.0% | 0.0% | 0.0%  | 0.0% | -      | 0.0% | 0.0% | 0.0% | 0.0% |        |
|              | 70÷140  | 0.0%   | 0.0% | 0.0%  | 0.0%  | 0.0% | 0.0%       | 0.0% | 0.0% | 0.0%  | 0.0% | -      | 0.0% | 0.0% | 0.0% | 0.0% |        |
|              | 140÷210 | 0.2%   | 0.0% | 0.2%  | 0.0%  | 0.0% | 0.0%       | 0.0% | 0.3% | 0.0%  | 0.0% | -      | 0.0% | 0.0% | 0.0% | 0.0% |        |
|              | 210÷280 | 0.1%   | 0.1% | 0.2%  | 2.7%  | 1.7% | 0.0%       | 0.0% | 0.6% | 1.9%  | 1.2% | -      | 0.1% | 0.4% | 0.8% | 0.7% |        |
|              | 280÷350 | 0.0%   | 0.7% | 1.6%  | 5.2%  | 5.8% | 0.1%       | 0.2% | 0.5% | 3.9%  | 4.0% | -      | 0.0% | 0.3% | 0.9% | 2.1% |        |
|              | 350÷420 | 0.0%   | 0.9% | 2.8%  | 5.0%  | 5.5% | 0.0%       | 0.3% | 1.5% | 3.3%  | 5.1% | -      | 0.0% | 0.3% | 0.8% | 1.5% |        |
|              | 420÷490 | 0.3%   | 1.9% | 0.8%  | 2.3%  | 4.1% | 0.0%       | 1.6% | 0.4% | 3.5%  | 4.1% | -      | 0.3% | 0.0% | 1.2% | 1.0% |        |
|              | 490÷560 | 0.0%   | 0.0% | 0.0%  | 10.6% | 0.5% | 0.0%       | 0.0% | 0.0% | 5.6%  | 1.0% | -      | 0.0% | 0.0% | 0.6% | 2.1% |        |
|              | 560÷630 | 0.0%   | -    | 0.0%  | 2.7%  | 0.0% | 0.0%       | -    | 0.0% | 0.0%  | 0.0% | -      | -    | 0.0% | 0.0% | 0.0% |        |
|              | 630÷700 | 0.0%   | -    | 0.0%  | 0.0%  | 0.0% | 0.0%       | -    | 0.0% | 0.0%  | 0.0% | -      | -    | 0.0% | 0.0% | 0.0% |        |

c)



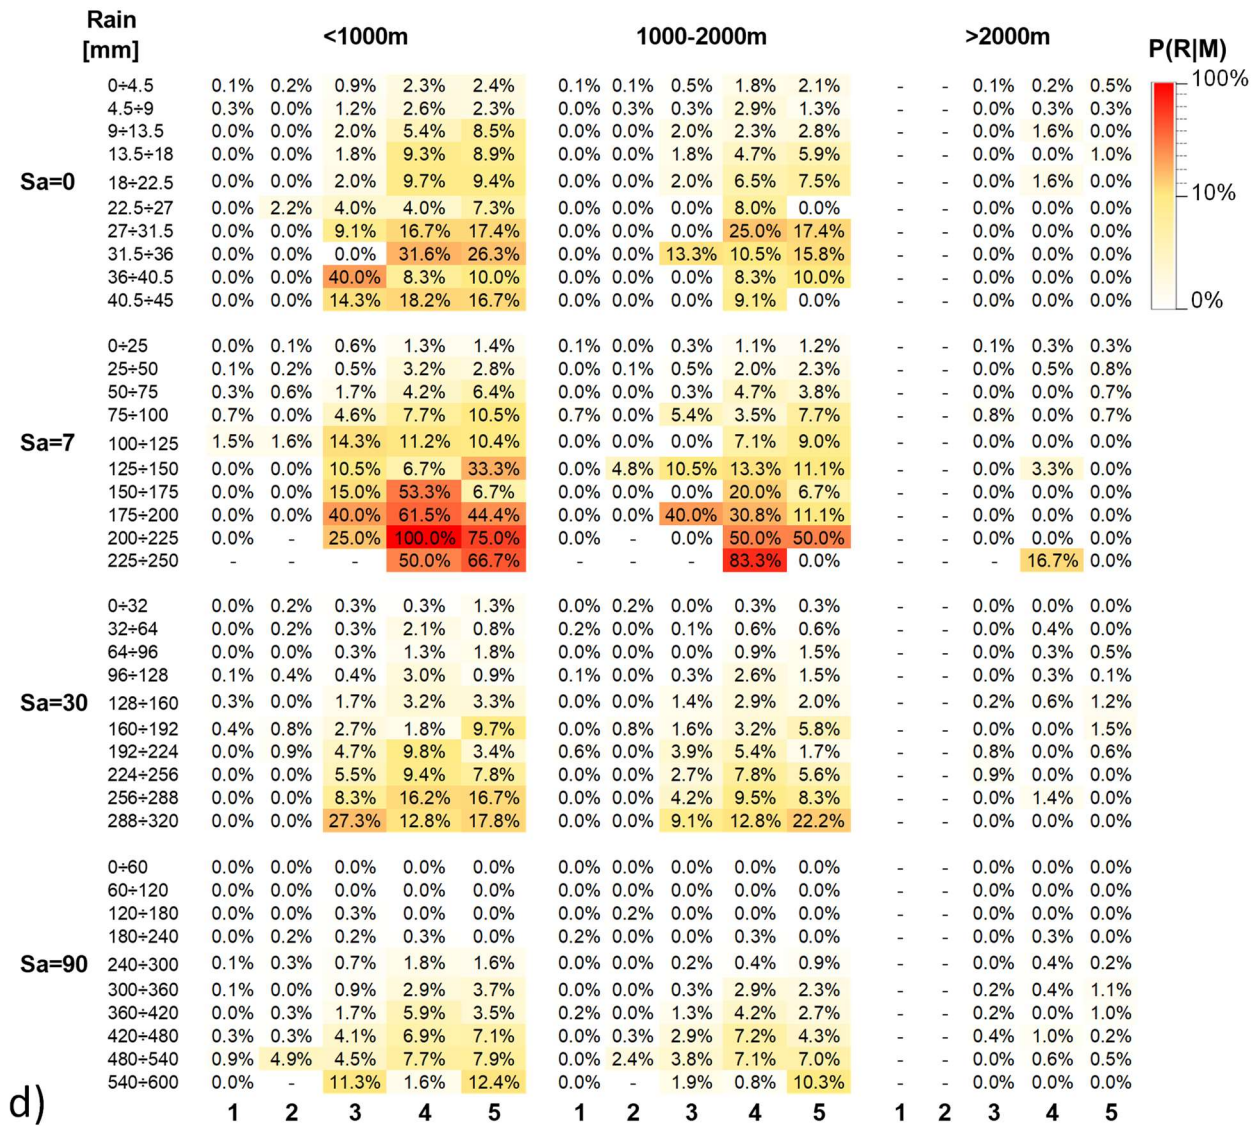

Fig. S23 Conditional probability,  $P(R|M)$ , calculated with Bayesian's method of rainfalls with different aggregation scales  $S_a$  (0, 7, 30, 90) and for different altitudes (<1000m, 1000m-2000m, >2000m) for 5 decades (1=1970-1979; 2=1980-1989; 3=1990-1999; 4=2000-2009; 5=2010-2019). (a) winter; (b) spring; (c) summer (d) autumn.

## S2.2 Air mean temperature

|       | T [°C]   | <1000m |       |       |       |       | 1000-2000m |      |      |      |      | >2000m |   |      |   |      | P(R M) |
|-------|----------|--------|-------|-------|-------|-------|------------|------|------|------|------|--------|---|------|---|------|--------|
|       |          | 1      | 2     | 3     | 4     | 5     | 1          | 2    | 3    | 4    | 5    | 1      | 2 | 3    | 4 | 5    |        |
| Sa=0  | -11÷-8.5 | 0.0%   | 0.0%  | 0.0%  | 0.0%  | 0.0%  | -          | 0.0% | 0.0% | 0.0% | 0.0% | -      | - | 0.0% | - | 0.0% |        |
|       | -8.5÷-6  | 0.0%   | 4.8%  | 0.0%  | 0.0%  | 4.2%  | -          | 0.0% | 0.0% | 0.0% | 0.0% | -      | - | 0.0% | - | 0.0% |        |
|       | -6÷-3.5  | 0.0%   | 0.0%  | 2.9%  | 17.0% | 6.7%  | -          | 0.0% | 0.0% | 4.3% | 0.0% | -      | - | 0.0% | - | 1.3% |        |
|       | -3.5÷-1  | 0.4%   | 2.7%  | 2.0%  | 11.0% | 16.0% | -          | 0.7% | 0.4% | 2.6% | 2.3% | -      | - | 0.0% | - | 0.0% |        |
|       | -1÷1.5   | 0.0%   | 2.2%  | 1.6%  | 14.5% | 12.5% | -          | 0.2% | 0.5% | 3.3% | 3.6% | -      | - | 0.0% | - | 0.3% |        |
|       | 1.5÷4    | 0.0%   | 0.9%  | 3.3%  | 13.4% | 14.0% | -          | 0.4% | 0.0% | 4.2% | 3.6% | -      | - | 0.0% | - | 0.2% |        |
|       | 4÷6.5    | 0.0%   | 1.0%  | 0.6%  | 3.6%  | 3.3%  | -          | 0.0% | 0.3% | 2.5% | 1.9% | -      | - | 0.3% | - | 0.3% |        |
|       | 6.5÷9    | 0.0%   | 0.0%  | 0.3%  | 0.3%  | 0.0%  | -          | 0.0% | 0.0% | 0.3% | 0.0% | -      | - | 0.0% | - | 0.0% |        |
|       | 9÷11.5   | 0.0%   | 0.0%  | 0.0%  | 0.0%  | 0.0%  | -          | 0.0% | 0.0% | 0.0% | 0.2% | -      | - | 0.0% | - | 0.0% |        |
|       | 11.5÷14  | 0.0%   | 0.0%  | 0.0%  | 0.0%  | 0.0%  | -          | 0.0% | 0.0% | 0.0% | 0.0% | -      | - | 0.0% | - | 0.0% |        |
| Sa=7  | -11÷-8.5 | -      | 0.0%  | -     | -     | -     | -          | 0.0% | -    | -    | -    | -      | - | -    | - | -    |        |
|       | -8.5÷-6  | 0.0%   | 0.0%  | 0.0%  | 0.0%  | 11.1% | -          | 0.0% | 0.0% | 0.0% | 0.0% | -      | - | 0.0% | - | 0.0% |        |
|       | -6÷-3.5  | 0.0%   | 3.6%  | 3.1%  | 9.8%  | 7.0%  | -          | 1.2% | 0.0% | 0.0% | 1.8% | -      | - | 0.0% | - | 0.0% |        |
|       | -3.5÷-1  | 0.0%   | 1.7%  | 3.3%  | 11.7% | 13.6% | -          | 0.0% | 0.0% | 2.3% | 1.4% | -      | - | 0.0% | - | 0.0% |        |
|       | -1÷1.5   | 0.2%   | 2.1%  | 2.9%  | 19.6% | 17.3% | -          | 0.6% | 0.4% | 5.3% | 3.6% | -      | - | 0.0% | - | 0.3% |        |
|       | 1.5÷4    | 0.0%   | 1.6%  | 1.5%  | 11.0% | 11.9% | -          | 0.2% | 0.3% | 4.1% | 4.6% | -      | - | 0.0% | - | 0.7% |        |
|       | 4÷6.5    | 0.0%   | 0.0%  | 0.3%  | 2.0%  | 1.8%  | -          | 0.0% | 0.0% | 1.5% | 0.9% | -      | - | 0.0% | - | 0.0% |        |
|       | 6.5÷9    | 0.0%   | 0.0%  | 0.0%  | 0.0%  | 0.0%  | -          | 0.0% | 0.3% | 0.0% | 0.0% | -      | - | 0.3% | - | 0.0% |        |
|       | 9÷11.5   | 0.0%   | 0.0%  | 0.0%  | 0.0%  | 0.0%  | -          | 0.0% | 0.0% | 0.0% | 0.0% | -      | - | 0.0% | - | 0.0% |        |
|       | 11.5÷14  | 0.0%   | 0.0%  | 0.0%  | 0.0%  | 0.0%  | -          | 0.0% | 0.0% | 0.0% | 0.0% | -      | - | 0.0% | - | 0.0% |        |
| Sa=30 | -11÷-8.5 | -      | -     | -     | -     | -     | -          | -    | -    | -    | -    | -      | - | -    | - | -    |        |
|       | -8.5÷-6  | -      | -     | -     | -     | -     | -          | -    | -    | -    | -    | -      | - | -    | - | -    |        |
|       | -6÷-3.5  | 0.0%   | 11.1% | 10.0% | 0.0%  | 0.0%  | -          | 0.0% | 0.0% | 0.0% | 7.7% | -      | - | 0.0% | - | 0.0% |        |
|       | -3.5÷-1  | 0.4%   | 2.9%  | 5.7%  | 17.5% | 19.6% | -          | 0.4% | 0.9% | 0.5% | 2.8% | -      | - | 0.0% | - | 0.0% |        |
|       | -1÷1.5   | 0.0%   | 1.3%  | 3.1%  | 18.9% | 16.9% | -          | 0.3% | 0.3% | 5.9% | 4.7% | -      | - | 0.2% | - | 0.2% |        |
|       | 1.5÷4    | 0.0%   | 1.5%  | 0.0%  | 6.7%  | 7.6%  | -          | 0.6% | 0.0% | 3.4% | 2.2% | -      | - | 0.0% | - | 0.7% |        |
|       | 4÷6.5    | 0.0%   | 0.0%  | 0.0%  | 2.9%  | 1.0%  | -          | 0.0% | 0.0% | 1.7% | 0.7% | -      | - | 0.0% | - | 0.0% |        |
|       | 6.5÷9    | 0.0%   | 0.0%  | 0.0%  | 0.0%  | 0.5%  | -          | 0.0% | 0.0% | 0.0% | 0.2% | -      | - | 0.0% | - | 0.0% |        |
|       | 9÷11.5   | 0.0%   | 0.0%  | 0.0%  | 0.0%  | 0.0%  | -          | 0.0% | 0.0% | 0.0% | 0.0% | -      | - | 0.0% | - | 0.0% |        |
|       | 11.5÷14  | 0.0%   | 0.0%  | 0.0%  | 0.0%  | 0.0%  | -          | 0.0% | 0.0% | 0.0% | 0.0% | -      | - | 0.0% | - | 0.0% |        |
| Sa=90 | -11÷-8.5 | -      | -     | -     | -     | -     | -          | -    | -    | -    | -    | -      | - | -    | - | -    |        |
|       | -8.5÷-6  | -      | -     | -     | -     | -     | -          | -    | -    | -    | -    | -      | - | -    | - | -    |        |
|       | -6÷-3.5  | -      | -     | -     | -     | -     | -          | -    | -    | -    | -    | -      | - | -    | - | -    |        |
|       | -3.5÷-1  | 0.0%   | 2.3%  | 10.5% | 14.3% | 0.0%  | -          | 0.0% | 0.0% | 0.0% | 0.0% | -      | - | 0.0% | - | 0.0% |        |
|       | -1÷1.5   | 0.2%   | 1.8%  | 2.2%  | 12.9% | 9.6%  | -          | 0.2% | 0.5% | 3.8% | 3.1% | -      | - | 0.2% | - | 0.2% |        |
|       | 1.5÷4    | 0.0%   | 1.1%  | 1.2%  | 8.8%  | 9.5%  | -          | 0.0% | 0.2% | 1.7% | 2.7% | -      | - | 0.0% | - | 0.0% |        |
|       | 4÷6.5    | 0.0%   | 0.5%  | 1.3%  | 6.6%  | 6.9%  | -          | 0.5% | 0.0% | 2.0% | 1.7% | -      | - | 0.0% | - | 0.2% |        |
|       | 6.5÷9    | 0.0%   | 0.6%  | 0.5%  | 5.1%  | 3.9%  | -          | 0.3% | 0.0% | 3.3% | 0.6% | -      | - | 0.0% | - | 0.6% |        |
|       | 9÷11.5   | 0.0%   | 0.0%  | 0.0%  | 1.7%  | 1.1%  | -          | 0.0% | 0.0% | 1.2% | 0.9% | -      | - | 0.0% | - | 0.0% |        |
|       | 11.5÷14  | 0.0%   | 0.0%  | 0.0%  | 0.0%  | 0.0%  | -          | 0.0% | 0.0% | 0.0% | 0.0% | -      | - | 0.0% | - | 0.0% |        |

a)

| T [°C] |           | <1000m |      |      |       |       | 1000-2000m |      |      |      |      | >2000m |   |      |      |      | P(R M) |
|--------|-----------|--------|------|------|-------|-------|------------|------|------|------|------|--------|---|------|------|------|--------|
|        |           |        |      |      |       |       |            |      |      |      |      |        |   |      |      |      |        |
| Sa=0   | -7÷-3.8   | 1.3%   | 0.0% | 0.0% | 1.2%  | 0.0%  | 0.0%       | 0.0% | 0.0% | 0.0% | 0.0% | -      | - | 0.0% | 0.0% | 0.0% |        |
|        | -3.8÷-0.6 | 0.3%   | 0.5% | 0.0% | 0.7%  | 0.7%  | 0.0%       | 0.0% | 0.0% | 0.0% | 0.0% | -      | - | 0.0% | 0.0% | 0.0% |        |
|        | -0.6÷2.6  | 0.0%   | 0.2% | 0.4% | 1.9%  | 3.6%  | 0.0%       | 0.2% | 0.5% | 0.8% | 0.4% | -      | - | 0.0% | 0.0% | 0.2% |        |
|        | 2.6÷5.8   | 0.2%   | 0.8% | 2.1% | 7.9%  | 7.2%  | 0.4%       | 0.2% | 0.4% | 4.1% | 4.3% | -      | - | 0.0% | 0.0% | 0.2% |        |
|        | 5.8÷9     | 0.0%   | 1.6% | 2.4% | 11.5% | 8.8%  | 0.0%       | 0.9% | 1.5% | 7.0% | 9.5% | -      | - | 0.0% | 0.0% | 0.5% |        |
|        | 9÷12.2    | 0.0%   | 0.0% | 2.4% | 6.3%  | 7.5%  | 0.0%       | 0.5% | 1.2% | 3.6% | 6.7% | -      | - | 0.0% | 0.7% | 0.8% |        |
|        | 12.2÷15.4 | 0.0%   | 0.4% | 0.2% | 1.6%  | 5.7%  | 0.2%       | 0.0% | 0.2% | 2.3% | 3.3% | -      | - | 0.2% | 0.0% | 0.6% |        |
|        | 15.4÷18.6 | 0.2%   | 0.0% | 0.0% | 0.4%  | 1.5%  | 0.0%       | 0.0% | 0.2% | 1.1% | 1.3% | -      | - | 0.0% | 0.4% | 0.2% |        |
|        | 18.6÷21.8 | 0.0%   | 0.0% | 0.0% | 0.3%  | 0.0%  | 0.0%       | 0.0% | 0.0% | 0.3% | 0.0% | -      | - | 0.0% | 0.0% | 0.0% |        |
|        | 21.8÷25   | 0.0%   | 0.0% | 0.0% | 0.0%  | 0.0%  | 0.0%       | 0.0% | 0.0% | 0.0% | 0.0% | -      | - | 0.0% | 0.0% | 0.0% |        |
| Sa=7   | -7÷-3.8   | 1.7%   | 0.0% | 0.0% | 2.2%  | 0.0%  | 0.0%       | 0.0% | 0.0% | 0.0% | 0.0% | -      | - | 0.0% | 0.0% | 0.0% |        |
|        | -3.8÷-0.6 | 0.3%   | 0.3% | 0.0% | 0.9%  | 0.0%  | 0.0%       | 0.3% | 0.0% | 0.6% | 0.0% | -      | - | 0.0% | 0.0% | 0.0% |        |
|        | -0.6÷2.6  | 0.1%   | 0.3% | 0.3% | 2.0%  | 3.7%  | 0.3%       | 0.0% | 0.0% | 0.4% | 0.4% | -      | - | 0.0% | 0.0% | 0.0% |        |
|        | 2.6÷5.8   | 0.0%   | 0.5% | 2.4% | 6.1%  | 8.9%  | 0.0%       | 0.2% | 1.3% | 3.7% | 4.2% | -      | - | 0.0% | 0.0% | 0.2% |        |
|        | 5.8÷9     | 0.0%   | 2.0% | 3.0% | 14.7% | 8.5%  | 0.2%       | 1.4% | 1.4% | 8.3% | 9.6% | -      | - | 0.0% | 0.0% | 0.9% |        |
|        | 9÷12.2    | 0.2%   | 0.2% | 1.6% | 5.1%  | 8.3%  | 0.0%       | 0.0% | 1.2% | 4.1% | 7.9% | -      | - | 0.0% | 0.7% | 0.6% |        |
|        | 12.2÷15.4 | 0.0%   | 0.2% | 0.4% | 2.3%  | 5.0%  | 0.0%       | 0.0% | 0.4% | 2.3% | 3.2% | -      | - | 0.2% | 0.4% | 0.8% |        |
|        | 15.4÷18.6 | 0.0%   | 0.0% | 0.0% | 0.2%  | 0.6%  | 0.0%       | 0.0% | 0.0% | 0.2% | 0.6% | -      | - | 0.0% | 0.0% | 0.0% |        |
|        | 18.6÷21.8 | 0.0%   | 0.0% | 0.0% | 0.0%  | 0.0%  | 0.0%       | 0.0% | 0.0% | 0.0% | 0.0% | -      | - | 0.0% | 0.0% | 0.0% |        |
|        | 21.8÷25   | -      | 0.0% | -    | 0.0%  | 0.0%  | -          | 0.0% | -    | 0.0% | 0.0% | -      | - | -    | 0.0% | 0.0% |        |
| Sa=30  | -7÷-3.8   | 0.0%   | 0.0% | 0.0% | -     | 0.0%  | 0.0%       | 0.0% | 0.0% | -    | 0.0% | -      | - | 0.0% | -    | 0.0% |        |
|        | -3.8÷-0.6 | 0.6%   | 0.0% | 0.0% | 1.6%  | 3.0%  | 0.3%       | 0.3% | 0.0% | 1.3% | 0.0% | -      | - | 0.0% | 0.0% | 0.0% |        |
|        | -0.6÷2.6  | 0.1%   | 0.7% | 0.6% | 4.4%  | 5.8%  | 0.1%       | 0.1% | 0.2% | 1.8% | 2.1% | -      | - | 0.0% | 0.0% | 0.0% |        |
|        | 2.6÷5.8   | 0.0%   | 0.7% | 2.4% | 10.0% | 7.7%  | 0.0%       | 0.7% | 1.8% | 6.8% | 6.3% | -      | - | 0.0% | 0.0% | 1.3% |        |
|        | 5.8÷9     | 0.2%   | 1.4% | 3.1% | 11.0% | 8.1%  | 0.2%       | 0.7% | 1.5% | 4.9% | 7.9% | -      | - | 0.0% | 0.2% | 0.2% |        |
|        | 9÷12.2    | 0.0%   | 0.3% | 1.4% | 2.6%  | 8.9%  | 0.0%       | 0.0% | 0.9% | 3.7% | 7.5% | -      | - | 0.0% | 0.5% | 1.2% |        |
|        | 12.2÷15.4 | 0.0%   | 0.2% | 0.0% | 0.8%  | 1.7%  | 0.0%       | 0.0% | 0.0% | 0.8% | 1.4% | -      | - | 0.0% | 0.4% | 0.0% |        |
|        | 15.4÷18.6 | 0.0%   | 0.0% | 0.0% | 0.0%  | 0.0%  | 0.0%       | 0.0% | 0.0% | 0.0% | 0.0% | -      | - | 0.2% | 0.0% | 0.0% |        |
|        | 18.6÷21.8 | 0.0%   | 0.0% | 0.0% | 0.0%  | 0.0%  | 0.0%       | 0.0% | 0.0% | 0.0% | 0.0% | -      | - | 0.0% | 0.0% | 0.0% |        |
|        | 21.8÷25   | -      | -    | -    | -     | -     | -          | -    | -    | -    | -    | -      | - | -    | -    | -    |        |
| Sa=90  | -7÷-3.8   | -      | -    | -    | -     | -     | -          | -    | -    | -    | -    | -      | - | -    | -    | -    |        |
|        | -3.8÷-0.6 | 3.3%   | 1.1% | 0.9% | 13.0% | 17.2% | 1.1%       | 0.4% | 0.0% | 5.2% | 0.0% | -      | - | 0.0% | 0.0% | 0.0% |        |
|        | -0.6÷2.6  | 0.0%   | 0.8% | 2.2% | 10.1% | 9.4%  | 0.1%       | 0.5% | 1.0% | 6.3% | 6.1% | -      | - | 0.0% | 0.2% | 0.7% |        |
|        | 2.6÷5.8   | 0.2%   | 1.4% | 2.5% | 7.9%  | 9.4%  | 0.2%       | 0.8% | 1.5% | 4.2% | 7.3% | -      | - | 0.0% | 0.0% | 0.6% |        |
|        | 5.8÷9     | 0.0%   | 0.2% | 1.1% | 3.2%  | 8.3%  | 0.0%       | 0.0% | 0.6% | 3.7% | 7.5% | -      | - | 0.0% | 0.9% | 0.8% |        |
|        | 9÷12.2    | 0.0%   | 0.0% | 0.0% | 0.2%  | 0.4%  | 0.0%       | 0.0% | 0.0% | 0.0% | 0.4% | -      | - | 0.0% | 0.0% | 0.0% |        |
|        | 12.2÷15.4 | 0.0%   | 0.0% | 0.0% | 0.0%  | 0.0%  | 0.0%       | 0.0% | 0.0% | 0.0% | 0.0% | -      | - | 0.0% | 0.0% | 0.0% |        |
|        | 15.4÷18.6 | 0.0%   | 0.0% | 0.0% | 0.0%  | 0.0%  | 0.0%       | 0.0% | 0.0% | 0.0% | 0.0% | -      | - | 0.2% | 0.0% | 0.0% |        |
|        | 18.6÷21.8 | -      | -    | -    | 0.0%  | 0.0%  | -          | -    | -    | 0.0% | 0.0% | -      | - | -    | 0.0% | 0.0% |        |
|        | 21.8÷25   | -      | -    | -    | -     | -     | -          | -    | -    | -    | -    | -      | - | -    | -    | -    |        |
| b)     |           | 1      | 2    | 3    | 4     | 5     | 1          | 2    | 3    | 4    | 5    | 1      | 2 | 3    | 4    | 5    |        |



| T [°C] |       | <1000m |      |      |        |       | 1000-2000m |      |      |      |       | >2000m |      |      |      |      | P(R M)                                                           |
|--------|-------|--------|------|------|--------|-------|------------|------|------|------|-------|--------|------|------|------|------|------------------------------------------------------------------|
|        |       |        |      |      |        |       |            |      |      |      |       |        |      |      |      |      |                                                                  |
| Sa=0   | 0÷3   | 0.3%   | 0.0% | 0.0% | 0.0%   | 0.0%  | 0.0%       | 0.0% | 0.0% | 0.0% | 0.0%  | -      | 0.0% | 0.0% | 0.0% | 0.0% | <div><div></div><div>100%</div><div>10%</div><div>0%</div></div> |
|        | 3÷6   | 0.0%   | 0.0% | 0.0% | 0.0%   | 0.0%  | 0.0%       | 0.0% | 0.0% | 0.0% | 0.0%  | -      | 0.0% | 0.0% | 0.0% | 0.0% |                                                                  |
|        | 6÷9   | 0.0%   | 0.5% | 0.0% | 0.0%   | 0.0%  | 0.0%       | 0.0% | 0.0% | 0.0% | 0.0%  | -      | 0.2% | 0.0% | 0.0% | 0.0% |                                                                  |
|        | 9÷12  | 0.0%   | 0.5% | 0.6% | 1.7%   | 1.0%  | 0.2%       | 0.3% | 0.4% | 0.7% | 0.6%  | -      | 0.0% | 0.2% | 0.2% | 0.2% |                                                                  |
|        | 12÷15 | 0.0%   | 1.1% | 1.4% | 5.8%   | 7.0%  | 0.0%       | 0.6% | 1.4% | 4.5% | 4.5%  | -      | 0.0% | 0.5% | 0.6% | 0.9% |                                                                  |
|        | 15÷18 | 0.2%   | 1.4% | 3.0% | 9.8%   | 9.0%  | 0.0%       | 0.4% | 1.5% | 6.7% | 6.3%  | -      | 0.0% | 0.4% | 1.3% | 2.1% |                                                                  |
|        | 18÷21 | 0.0%   | 1.1% | 3.1% | 9.0%   | 8.2%  | 0.0%       | 1.1% | 1.4% | 7.4% | 9.8%  | -      | 0.4% | 0.3% | 3.2% | 5.6% |                                                                  |
|        | 21÷24 | 0.0%   | 0.0% | 4.7% | 8.9%   | 7.8%  | 0.0%       | 0.0% | 2.3% | 5.0% | 8.7%  | -      | 0.0% | 0.0% | 1.0% | 4.3% |                                                                  |
|        | 24÷27 | -      | 0.0% | -    | 16.7%  | 0.0%  | -          | 0.0% | -    | 0.0% | 0.0%  | -      | 0.0% | -    | 0.0% | 0.0% |                                                                  |
|        | 27÷30 | -      | -    | -    | -      | -     | -          | -    | -    | -    | -     | -      | -    | -    | -    | -    |                                                                  |
| Sa=7   | 0÷3   | 0.3%   | 0.0% | 0.0% | 0.0%   | 0.0%  | 0.0%       | 0.0% | 0.0% | 0.0% | 0.0%  | -      | 0.0% | 0.0% | 0.0% | 0.0% |                                                                  |
|        | 3÷6   | 0.0%   | 0.0% | 0.0% | 0.0%   | 0.0%  | 0.0%       | 0.0% | 0.0% | 0.0% | 0.0%  | -      | 0.3% | 0.0% | 0.0% | 0.0% |                                                                  |
|        | 6÷9   | 0.0%   | 0.2% | 0.0% | 0.0%   | 0.0%  | 0.0%       | 0.0% | 0.0% | 0.0% | 0.0%  | -      | 0.0% | 0.0% | 0.0% | 0.0% |                                                                  |
|        | 9÷12  | 0.2%   | 0.3% | 0.2% | 0.0%   | 0.2%  | 0.0%       | 0.5% | 0.0% | 0.0% | 0.4%  | -      | 0.0% | 0.2% | 0.3% | 0.0% |                                                                  |
|        | 12÷15 | 0.0%   | 1.4% | 1.8% | 3.7%   | 5.6%  | 0.2%       | 0.0% | 1.4% | 2.6% | 2.6%  | -      | 0.0% | 0.4% | 0.2% | 0.9% |                                                                  |
|        | 15÷18 | 0.0%   | 0.7% | 3.7% | 10.1%  | 9.0%  | 0.0%       | 0.5% | 1.5% | 8.1% | 7.8%  | -      | 0.0% | 0.7% | 2.0% | 2.6% |                                                                  |
|        | 18÷21 | 0.0%   | 2.5% | 2.5% | 12.3%  | 10.1% | 0.0%       | 1.6% | 1.8% | 8.7% | 9.9%  | -      | 0.4% | 0.0% | 2.0% | 5.5% |                                                                  |
|        | 21÷24 | 0.0%   | 0.0% | 0.0% | 7.9%   | 11.3% | 0.0%       | 0.0% | 5.9% | 0.0% | 12.7% | -      | 0.0% | 0.0% | 4.8% | 4.2% |                                                                  |
|        | 24÷27 | -      | -    | -    | 100.0% | -     | -          | -    | -    | 0.0% | -     | -      | -    | -    | 0.0% | -    |                                                                  |
|        | 27÷30 | -      | -    | -    | -      | -     | -          | -    | -    | -    | -     | -      | -    | -    | -    | -    |                                                                  |
| Sa=30  | 0÷3   | 0.2%   | 0.0% | 0.0% | 0.0%   | 0.0%  | 0.0%       | 0.0% | 0.0% | 0.0% | 0.0%  | -      | 0.0% | 0.0% | 0.0% | 0.0% |                                                                  |
|        | 3÷6   | 0.0%   | 0.0% | 0.0% | 0.0%   | 0.0%  | 0.0%       | 0.0% | 0.0% | 0.0% | 0.0%  | -      | 0.3% | 0.0% | 0.0% | 0.0% |                                                                  |
|        | 6÷9   | 0.2%   | 0.0% | 0.0% | 0.0%   | 0.0%  | 0.0%       | 0.0% | 0.0% | 0.0% | 0.0%  | -      | 0.0% | 0.0% | 0.0% | 0.0% |                                                                  |
|        | 9÷12  | 0.0%   | 0.9% | 0.0% | 0.0%   | 1.5%  | 0.0%       | 0.0% | 0.0% | 0.0% | 0.9%  | -      | 0.0% | 0.3% | 0.0% | 0.2% |                                                                  |
|        | 12÷15 | 0.0%   | 1.8% | 3.1% | 6.1%   | 5.8%  | 0.0%       | 0.6% | 1.7% | 4.7% | 3.3%  | -      | 0.0% | 0.4% | 0.9% | 1.3% |                                                                  |
|        | 15÷18 | 0.0%   | 0.9% | 3.0% | 7.9%   | 6.0%  | 0.2%       | 0.6% | 0.9% | 6.4% | 7.1%  | -      | 0.2% | 0.6% | 1.4% | 2.8% |                                                                  |
|        | 18÷21 | 0.0%   | 0.6% | 0.9% | 11.7%  | 13.1% | 0.0%       | 1.1% | 2.7% | 7.4% | 10.1% | -      | 0.0% | 0.0% | 2.9% | 4.5% |                                                                  |
|        | 21÷24 | -      | -    | -    | 26.1%  | -     | -          | -    | -    | 4.3% | -     | -      | -    | -    | 0.0% | -    |                                                                  |
|        | 24÷27 | -      | -    | -    | -      | -     | -          | -    | -    | -    | -     | -      | -    | -    | -    | -    |                                                                  |
|        | 27÷30 | -      | -    | -    | -      | -     | -          | -    | -    | -    | -     | -      | -    | -    | -    | -    |                                                                  |
| Sa=90  | 0÷3   | 0.1%   | 0.0% | 0.0% | 0.0%   | 0.0%  | 0.0%       | 0.0% | 0.0% | 0.0% | 0.0%  | -      | 0.2% | 0.0% | 0.0% | 0.0% |                                                                  |
|        | 3÷6   | 0.2%   | 0.2% | 0.0% | 0.0%   | 0.0%  | 0.0%       | 0.0% | 0.0% | 0.0% | 0.0%  | -      | 0.0% | 0.0% | 0.0% | 0.0% |                                                                  |
|        | 6÷9   | 0.2%   | 1.5% | 0.4% | 0.7%   | 1.6%  | 0.0%       | 0.0% | 0.7% | 1.2% | 0.9%  | -      | 0.0% | 0.2% | 0.5% | 0.2% |                                                                  |
|        | 9÷12  | 0.0%   | 1.4% | 2.5% | 7.0%   | 7.3%  | 0.0%       | 0.9% | 1.3% | 5.3% | 5.9%  | -      | 0.0% | 0.2% | 1.0% | 1.4% |                                                                  |
|        | 12÷15 | 0.0%   | 1.0% | 1.8% | 6.0%   | 5.2%  | 0.0%       | 0.6% | 1.0% | 5.0% | 4.8%  | -      | 0.0% | 0.2% | 0.8% | 2.2% |                                                                  |
|        | 15÷18 | 0.0%   | 0.1% | 1.7% | 6.8%   | 5.5%  | 0.2%       | 0.3% | 0.8% | 4.3% | 5.0%  | -      | 0.1% | 0.4% | 1.6% | 2.5% |                                                                  |
|        | 18÷21 | -      | -    | 0.0% | 5.8%   | 7.9%  | -          | -    | 0.0% | 1.0% | 5.0%  | -      | -    | 0.0% | 0.0% | 2.2% |                                                                  |
|        | 21÷24 | -      | -    | -    | -      | -     | -          | -    | -    | -    | -     | -      | -    | -    | -    | -    |                                                                  |
|        | 24÷27 | -      | -    | -    | -      | -     | -          | -    | -    | -    | -     | -      | -    | -    | -    | -    |                                                                  |
|        | 27÷30 | -      | -    | -    | -      | -     | -          | -    | -    | -    | -     | -      | -    | -    | -    | -    |                                                                  |
| c)     |       | 1      | 2    | 3    | 4      | 5     | 1          | 2    | 3    | 4    | 5     | 1      | 2    | 3    | 4    | 5    |                                                                  |

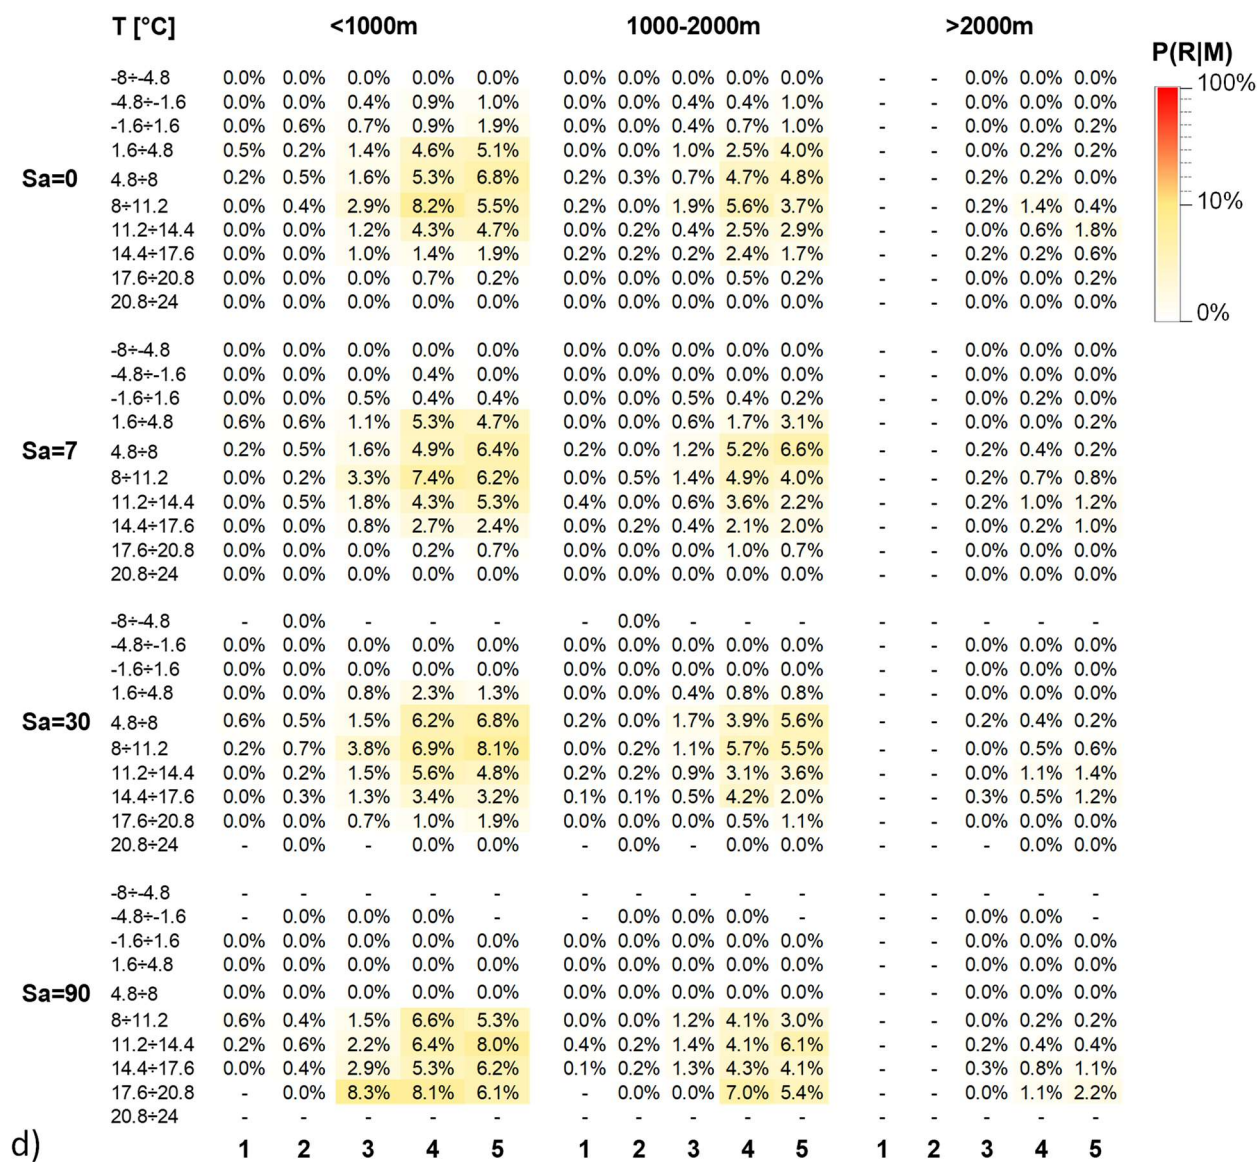

Fig. S24 Conditional probability,  $P(R|M)$ , calculated with Bayesian's method of mean temperatures with different aggregation scales  $S_a$  (0, 7, 30, 90) and for different altitudes (<1000m, 1000m-2000m, >2000m) for 5 decades (1=1970-1979; 2=1980-1989; 3=1990-1999; 4=2000-2009; 5=2010-2019). (a) winter; (b) spring; (c) summer (d) autumn.



| $\Delta T$ (°C) |        | <1000m |      |      |       |      | 1000-2000m |      |      |      |      | >2000m |   |      |   |   | P(R M) |
|-----------------|--------|--------|------|------|-------|------|------------|------|------|------|------|--------|---|------|---|---|--------|
|                 |        | 1      | 2    | 3    | 4     | 5    | 1          | 2    | 3    | 4    | 5    | 1      | 2 | 3    | 4 | 5 |        |
| Sa=1            | -10÷-8 | -      | -    | -    | -     | 0.0% | -          | -    | -    | -    | 0.0% | -      | - | -    | - | - | 0.0%   |
|                 | -8÷-6  | 0.0%   | -    | -    | -     | 0.0% | -          | -    | -    | -    | 0.0% | -      | - | -    | - | - | 0.0%   |
|                 | -6÷-4  | 0.0%   | 0.0% | 0.0% | 4.2%  | 2.2% | -          | 0.0% | 0.0% | 4.2% | 0.0% | -      | - | 0.0% | - | - | 0.0%   |
|                 | -4÷-2  | 0.0%   | 0.9% | 0.0% | 5.3%  | 6.2% | -          | 0.0% | 0.0% | 1.4% | 0.7% | -      | - | 0.0% | - | - | 0.4%   |
|                 | -2÷0   | 0.1%   | 0.7% | 1.0% | 5.4%  | 4.9% | -          | 0.3% | 0.2% | 1.3% | 1.4% | -      | - | 0.1% | - | - | 0.1%   |
|                 | 0÷2    | 0.0%   | 0.6% | 0.9% | 3.6%  | 3.6% | -          | 0.0% | 0.1% | 1.2% | 0.9% | -      | - | 0.0% | - | - | 0.1%   |
|                 | 2÷4    | 0.0%   | 1.4% | 1.2% | 4.7%  | 3.5% | -          | 0.7% | 0.0% | 2.1% | 1.5% | -      | - | 0.0% | - | - | 0.0%   |
|                 | 4÷6    | 0.0%   | 0.0% | 0.0% | 0.0%  | 5.3% | -          | 0.0% | 0.0% | 0.0% | 0.0% | -      | - | 0.0% | - | - | 0.0%   |
|                 | 6÷8    | -      | -    | -    | -     | 0.0% | -          | -    | -    | -    | 0.0% | -      | - | -    | - | - | 0.0%   |
| Sa=3            | -10÷-8 | 0.0%   | 0.0% | 0.0% | 0.0%  | 0.0% | -          | 0.0% | 0.0% | 0.0% | 0.0% | -      | - | 0.0% | - | - | 0.0%   |
|                 | -8÷-6  | 0.0%   | 0.0% | 0.0% | 3.0%  | 2.4% | -          | 0.0% | 0.0% | 1.5% | 0.0% | -      | - | 0.0% | - | - | 0.0%   |
|                 | -6÷-4  | 0.0%   | 1.1% | 0.5% | 5.6%  | 3.6% | -          | 0.0% | 0.0% | 2.8% | 0.9% | -      | - | 0.0% | - | - | 0.9%   |
|                 | -4÷-2  | 0.0%   | 0.6% | 0.4% | 4.8%  | 4.5% | -          | 0.4% | 0.2% | 1.5% | 1.3% | -      | - | 0.2% | - | - | 0.0%   |
|                 | -2÷0   | 0.1%   | 0.5% | 0.8% | 4.5%  | 5.0% | -          | 0.1% | 0.3% | 1.0% | 1.5% | -      | - | 0.0% | - | - | 0.1%   |
|                 | 0÷2    | 0.0%   | 0.5% | 1.1% | 4.8%  | 4.1% | -          | 0.1% | 0.0% | 1.2% | 1.1% | -      | - | 0.0% | - | - | 0.1%   |
|                 | 2÷4    | 0.0%   | 1.2% | 1.2% | 3.6%  | 3.6% | -          | 0.2% | 0.0% | 1.5% | 0.3% | -      | - | 0.0% | - | - | 0.0%   |
|                 | 4÷6    | 0.0%   | 1.3% | 1.0% | 3.3%  | 4.8% | -          | 0.0% | 0.0% | 1.4% | 1.0% | -      | - | 0.0% | - | - | 0.0%   |
|                 | 6÷8    | 0.0%   | 0.0% | 0.0% | 14.8% | 6.3% | -          | 0.0% | 0.0% | 0.0% | 6.3% | -      | - | 0.0% | - | - | 0.0%   |
| Sa=6            | -10÷-8 | 0.0%   | 0.0% | 0.0% | 3.3%  | 1.9% | -          | 0.0% | 0.0% | 6.7% | 0.0% | -      | - | 0.0% | - | - | 0.0%   |
|                 | -8÷-6  | 0.0%   | 0.0% | 0.9% | 4.3%  | 0.9% | -          | 0.0% | 0.0% | 0.0% | 0.0% | -      | - | 0.0% | - | - | 0.0%   |
|                 | -6÷-4  | 0.0%   | 1.4% | 1.0% | 4.6%  | 3.4% | -          | 0.5% | 0.0% | 1.6% | 0.7% | -      | - | 0.0% | - | - | 0.3%   |
|                 | -4÷-2  | 0.2%   | 0.6% | 0.7% | 4.8%  | 3.6% | -          | 0.0% | 0.2% | 0.9% | 0.9% | -      | - | 0.0% | - | - | 0.2%   |
|                 | -2÷0   | 0.0%   | 0.4% | 0.5% | 3.7%  | 4.3% | -          | 0.1% | 0.4% | 1.0% | 1.3% | -      | - | 0.1% | - | - | 0.0%   |
|                 | 0÷2    | 0.0%   | 0.5% | 0.8% | 4.6%  | 4.1% | -          | 0.1% | 0.0% | 2.0% | 1.3% | -      | - | 0.0% | - | - | 0.3%   |
|                 | 2÷4    | 0.0%   | 0.7% | 0.7% | 4.5%  | 6.5% | -          | 0.2% | 0.0% | 1.4% | 1.0% | -      | - | 0.0% | - | - | 0.0%   |
|                 | 4÷6    | 0.0%   | 1.8% | 1.8% | 5.1%  | 3.5% | -          | 0.4% | 0.0% | 1.0% | 1.9% | -      | - | 0.0% | - | - | 0.0%   |
|                 | 6÷8    | 0.0%   | 1.1% | 2.9% | 3.5%  | 4.5% | -          | 0.0% | 0.0% | 0.9% | 0.9% | -      | - | 0.0% | - | - | 0.0%   |
| a)              | -10÷-8 | 0.0%   | 5.9% | 2.4% | 4.2%  | 9.7% | -          | 0.0% | 0.0% | 4.2% | 3.2% | -      | - | 0.0% | - | - | 0.0%   |
|                 | -8÷-6  | 0.0%   | 0.0% | 0.0% | 0.0%  | 0.0% | -          | 0.0% | 0.0% | 0.0% | 0.0% | -      | - | 0.0% | - | - | 0.0%   |
|                 | -6÷-4  | 0.0%   | 0.0% | 0.0% | 0.0%  | 0.0% | -          | 0.0% | 0.0% | 0.0% | 0.0% | -      | - | 0.0% | - | - | 0.0%   |
|                 | -4÷-2  | 0.0%   | 0.0% | 0.0% | 0.0%  | 0.0% | -          | 0.0% | 0.0% | 0.0% | 0.0% | -      | - | 0.0% | - | - | 0.0%   |
|                 | -2÷0   | 0.0%   | 0.0% | 0.0% | 0.0%  | 0.0% | -          | 0.0% | 0.0% | 0.0% | 0.0% | -      | - | 0.0% | - | - | 0.0%   |
|                 | 0÷2    | 0.0%   | 0.0% | 0.0% | 0.0%  | 0.0% | -          | 0.0% | 0.0% | 0.0% | 0.0% | -      | - | 0.0% | - | - | 0.0%   |
|                 | 2÷4    | 0.0%   | 0.0% | 0.0% | 0.0%  | 0.0% | -          | 0.0% | 0.0% | 0.0% | 0.0% | -      | - | 0.0% | - | - | 0.0%   |
|                 | 4÷6    | 0.0%   | 0.0% | 0.0% | 0.0%  | 0.0% | -          | 0.0% | 0.0% | 0.0% | 0.0% | -      | - | 0.0% | - | - | 0.0%   |
|                 | 6÷8    | 0.0%   | 0.0% | 0.0% | 0.0%  | 0.0% | -          | 0.0% | 0.0% | 0.0% | 0.0% | -      | - | 0.0% | - | - | 0.0%   |

| $\Delta T$ (°C) |           | <1000m |      |      |       |       | 1000-2000m |      |      |       |      | >2000m |   |      |      |      | P(R M) |
|-----------------|-----------|--------|------|------|-------|-------|------------|------|------|-------|------|--------|---|------|------|------|--------|
|                 |           | 1      | 2    | 3    | 4     | 5     | 1          | 2    | 3    | 4     | 5    | 1      | 2 | 3    | 4    | 5    |        |
| Sa=1            | -11÷-8.8  | -      | -    | -    | -     | -     | -          | -    | -    | -     | -    | -      | - | -    | -    | -    | 100%   |
|                 | -8.8÷-6.6 | 0.0%   | -    | -    | -     | 0.0%  | 0.0%       | -    | -    | -     | 0.0% | -      | - | -    | -    | 0.0% |        |
|                 | -6.6÷-4.4 | 0.0%   | 0.0% | 0.0% | 0.0%  | 0.0%  | 0.0%       | 0.0% | 0.0% | 0.0%  | 2.9% | -      | - | 0.0% | 0.0% | 0.0% |        |
|                 | -4.4÷-2.2 | 0.0%   | 0.0% | 0.5% | 4.4%  | 4.6%  | 0.0%       | 0.0% | 1.8% | 1.7%  | 5.5% | -      | - | 0.0% | 0.0% | 0.0% |        |
|                 | -2.2÷0    | 0.0%   | 0.4% | 1.1% | 3.9%  | 3.6%  | 0.1%       | 0.1% | 0.8% | 2.2%  | 2.8% | -      | - | 0.0% | 0.1% | 0.3% |        |
|                 | 0÷2.2     | 0.2%   | 0.5% | 1.0% | 3.7%  | 5.0%  | 0.1%       | 0.3% | 0.2% | 2.7%  | 3.6% | -      | - | 0.1% | 0.2% | 0.4% |        |
|                 | 2.2÷4.4   | 0.0%   | 0.0% | 0.6% | 4.1%  | 8.9%  | 0.0%       | 1.1% | 0.6% | 2.3%  | 2.8% | -      | - | 0.0% | 0.0% | 0.5% |        |
|                 | 4.4÷6.6   | 0.0%   | 0.0% | 0.0% | 0.0%  | 0.0%  | 0.0%       | 0.0% | 0.0% | 0.0%  | 0.0% | -      | - | 0.0% | 0.0% | 0.0% |        |
|                 | 6.6÷8.8   | -      | -    | -    | -     | -     | -          | -    | -    | -     | -    | -      | - | -    | -    | -    |        |
|                 | 8.8÷11    | -      | -    | -    | -     | -     | -          | -    | -    | -     | -    | -      | - | -    | -    | -    |        |
| Sa=3            | -11÷-8.8  | 0.0%   | 0.0% | 0.0% | 10.0% | 0.0%  | 0.0%       | 0.0% | 0.0% | 0.0%  | 0.0% | -      | - | 0.0% | 0.0% | 0.0% |        |
|                 | -8.8÷-6.6 | 0.0%   | 0.0% | 0.0% | 2.2%  | 6.4%  | 0.0%       | 0.0% | 2.3% | 2.2%  | 6.4% | -      | - | 0.0% | 0.0% | 0.0% |        |
|                 | -6.6÷-4.4 | 0.0%   | 0.0% | 0.6% | 2.8%  | 5.9%  | 0.0%       | 0.0% | 0.6% | 1.7%  | 2.2% | -      | - | 0.0% | 0.0% | 0.5% |        |
|                 | -4.4÷-2.2 | 0.0%   | 0.2% | 1.5% | 5.3%  | 4.3%  | 0.0%       | 0.0% | 1.3% | 3.0%  | 3.6% | -      | - | 0.0% | 0.2% | 0.4% |        |
|                 | -2.2÷0    | 0.0%   | 0.7% | 0.9% | 3.7%  | 4.2%  | 0.0%       | 0.2% | 0.2% | 1.4%  | 3.8% | -      | - | 0.1% | 0.1% | 0.2% |        |
|                 | 0÷2.2     | 0.1%   | 0.4% | 0.7% | 3.4%  | 3.7%  | 0.1%       | 0.3% | 0.3% | 2.6%  | 3.2% | -      | - | 0.0% | 0.1% | 0.5% |        |
|                 | 2.2÷4.4   | 0.6%   | 0.4% | 1.6% | 4.2%  | 6.3%  | 0.4%       | 0.4% | 0.9% | 3.3%  | 3.3% | -      | - | 0.0% | 0.0% | 0.2% |        |
|                 | 4.4÷6.6   | 0.0%   | 0.0% | 0.6% | 3.7%  | 4.8%  | 0.0%       | 0.0% | 0.6% | 3.7%  | 1.8% | -      | - | 0.0% | 1.2% | 0.6% |        |
|                 | 6.6÷8.8   | 0.0%   | 0.0% | 0.0% | 0.0%  | 3.7%  | 0.0%       | 0.0% | 0.0% | 0.0%  | 0.0% | -      | - | 0.0% | 0.0% | 0.0% |        |
|                 | 8.8÷11    | 0.0%   | 0.0% | 0.0% | -     | 20.0% | 0.0%       | 0.0% | 0.0% | -     | 0.0% | -      | - | 0.0% | -    | 0.0% |        |
| Sa=6            | -11÷-8.8  | 0.0%   | 0.0% | 0.0% | 10.0% | 4.2%  | 0.0%       | 0.0% | 0.0% | 5.0%  | 4.2% | -      | - | 0.0% | 0.0% | 0.0% |        |
|                 | -8.8÷-6.6 | 0.0%   | 0.0% | 0.0% | 2.4%  | 3.7%  | 0.0%       | 0.0% | 0.0% | 0.0%  | 0.0% | -      | - | 0.0% | 0.0% | 0.0% |        |
|                 | -6.6÷-4.4 | 0.0%   | 1.6% | 0.4% | 4.1%  | 3.9%  | 0.0%       | 0.0% | 1.5% | 3.3%  | 2.7% | -      | - | 0.0% | 0.4% | 0.0% |        |
|                 | -4.4÷-2.2 | 0.0%   | 0.2% | 1.6% | 2.2%  | 3.8%  | 0.0%       | 0.2% | 0.7% | 1.7%  | 4.0% | -      | - | 0.2% | 0.0% | 0.3% |        |
|                 | -2.2÷0    | 0.0%   | 0.4% | 1.2% | 3.7%  | 3.8%  | 0.0%       | 0.0% | 0.4% | 1.3%  | 3.1% | -      | - | 0.0% | 0.0% | 0.1% |        |
|                 | 0÷2.2     | 0.2%   | 0.4% | 0.6% | 4.3%  | 5.0%  | 0.2%       | 0.3% | 0.2% | 2.1%  | 3.3% | -      | - | 0.0% | 0.2% | 0.4% |        |
|                 | 2.2÷4.4   | 0.2%   | 0.5% | 1.2% | 4.2%  | 5.3%  | 0.0%       | 0.5% | 0.8% | 4.3%  | 3.8% | -      | - | 0.0% | 0.3% | 1.0% |        |
|                 | 4.4÷6.6   | 0.0%   | 0.4% | 0.8% | 4.7%  | 6.5%  | 0.0%       | 0.4% | 0.8% | 3.1%  | 3.9% | -      | - | 0.0% | 0.0% | 0.0% |        |
|                 | 6.6÷8.8   | 0.0%   | 0.0% | 1.2% | 6.9%  | 4.6%  | 1.4%       | 0.0% | 0.0% | 0.0%  | 2.3% | -      | - | 0.0% | 0.0% | 0.0% |        |
|                 | 8.8÷11    | 11.1%  | 0.0% | 4.8% | 4.5%  | 0.0%  | 0.0%       | 0.0% | 0.0% | 13.6% | 0.0% | -      | - | 0.0% | 0.0% | 0.0% |        |
| b)              |           | 1      | 2    | 3    | 4     | 5     | 1          | 2    | 3    | 4     | 5    | 1      | 2 | 3    | 4    | 5    |        |

| $\Delta T$ (°C) |         | <1000m |      |      |      |      | 1000-2000m |      |      |      |       | >2000m |      |      |      |      | P(R M) |
|-----------------|---------|--------|------|------|------|------|------------|------|------|------|-------|--------|------|------|------|------|--------|
|                 |         |        |      |      |      |      |            |      |      |      |       |        |      |      |      |      |        |
| Sa=1            | -15÷-12 | -      | -    | -    | -    | -    | -          | -    | -    | -    | -     | -      | -    | -    | -    | -    |        |
|                 | -12÷-9  | -      | -    | -    | -    | -    | -          | -    | -    | -    | -     | -      | -    | -    | -    | -    |        |
|                 | -9÷-6   | 0.0%   | -    | -    | -    | 0.0% | 0.0%       | -    | -    | -    | 14.3% | -      | -    | -    | -    | 0.0% |        |
|                 | -6÷-3   | 0.0%   | 0.0% | 0.0% | 4.1% | 0.9% | 0.0%       | 0.0% | 1.1% | 0.0% | 6.0%  | -      | 0.0% | 0.0% | 0.0% | 0.9% |        |
|                 | -3÷0    | 0.1%   | 0.6% | 0.7% | 3.8% | 3.6% | 0.1%       | 0.2% | 0.6% | 2.4% | 2.4%  | -      | 0.1% | 0.2% | 0.6% | 1.2% |        |
|                 | 0÷3     | 0.1%   | 0.5% | 1.2% | 3.0% | 3.1% | 0.0%       | 0.3% | 0.5% | 2.6% | 2.8%  | -      | 0.1% | 0.2% | 0.7% | 1.1% |        |
|                 | 3÷6     | 0.0%   | 0.0% | 0.0% | 0.0% | 1.3% | 0.0%       | 0.0% | 0.0% | 0.0% | 0.0%  | -      | 0.0% | 0.0% | 0.0% | 0.0% |        |
|                 | 6÷9     | -      | -    | -    | -    | 0.0% | -          | -    | -    | -    | 0.0%  | -      | -    | -    | -    | 0.0% |        |
|                 | 9÷12    | -      | -    | -    | -    | -    | -          | -    | -    | -    | -     | -      | -    | -    | -    | -    |        |
|                 | 12÷15   | -      | -    | -    | -    | -    | -          | -    | -    | -    | -     | -      | -    | -    | -    | -    |        |
| Sa=3            | -15÷-12 | 0.0%   | -    | -    | -    | 0.0% | 0.0%       | -    | -    | -    | 0.0%  | -      | -    | -    | -    | 0.0% |        |
|                 | -12÷-9  | 0.0%   | 0.0% | 0.0% | 0.0% | 0.0% | 0.0%       | 0.0% | 0.0% | 0.0% | 14.3% | -      | 0.0% | 0.0% | 0.0% | 0.0% |        |
|                 | -9÷-6   | 0.0%   | 3.6% | 0.0% | 6.6% | 8.0% | 0.0%       | 0.0% | 1.4% | 2.6% | 0.0%  | -      | 0.0% | 1.4% | 1.3% | 2.3% |        |
|                 | -6÷-3   | 0.3%   | 0.3% | 1.2% | 5.9% | 3.6% | 0.3%       | 0.5% | 0.7% | 3.6% | 2.9%  | -      | 0.0% | 0.2% | 0.5% | 0.5% |        |
|                 | -3÷0    | 0.1%   | 0.7% | 0.9% | 3.1% | 3.2% | 0.0%       | 0.2% | 0.6% | 2.4% | 3.0%  | -      | 0.1% | 0.2% | 0.7% | 1.0% |        |
|                 | 0÷3     | 0.0%   | 0.3% | 1.1% | 3.1% | 3.1% | 0.0%       | 0.3% | 0.4% | 1.8% | 2.4%  | -      | 0.1% | 0.1% | 0.6% | 1.4% |        |
|                 | 3÷6     | 0.3%   | 0.5% | 0.7% | 2.0% | 2.8% | 0.0%       | 0.0% | 0.4% | 2.9% | 3.2%  | -      | 0.0% | 0.0% | 0.9% | 1.1% |        |
|                 | 6÷9     | 0.0%   | 0.0% | 0.0% | 3.1% | 0.0% | 0.0%       | 0.0% | 0.0% | 6.3% | 0.0%  | -      | 0.0% | 0.0% | 0.0% | 0.0% |        |
|                 | 9÷12    | 0.0%   | 0.0% | 0.0% | -    | 0.0% | 0.0%       | 0.0% | 0.0% | -    | 0.0%  | -      | 0.0% | 0.0% | -    | 0.0% |        |
|                 | 12÷15   | -      | -    | -    | 0.0% | -    | -          | -    | -    | 0.0% | -     | -      | -    | -    | 0.0% | -    |        |
| Sa=6            | -15÷-12 | -      | 0.0% | 0.0% | 0.0% | 0.0% | -          | 0.0% | 0.0% | 0.0% | 0.0%  | -      | 0.0% | 0.0% | 0.0% | 0.0% |        |
|                 | -12÷-9  | 0.0%   | 0.0% | 0.0% | 0.0% | 9.5% | 0.0%       | 0.0% | 4.3% | 5.9% | 9.5%  | -      | 0.0% | 0.0% | 0.0% | 4.8% |        |
|                 | -9÷-6   | 0.0%   | 0.7% | 0.0% | 4.3% | 3.9% | 0.0%       | 0.0% | 0.7% | 0.7% | 3.9%  | -      | 0.0% | 0.7% | 0.0% | 0.7% |        |
|                 | -6÷-3   | 0.0%   | 1.1% | 1.3% | 5.3% | 4.2% | 0.0%       | 0.4% | 0.6% | 3.1% | 3.1%  | -      | 0.0% | 0.2% | 0.7% | 0.9% |        |
|                 | -3÷0    | 0.0%   | 0.4% | 0.8% | 2.7% | 3.0% | 0.1%       | 0.3% | 0.6% | 2.5% | 2.9%  | -      | 0.1% | 0.1% | 0.5% | 0.9% |        |
|                 | 0÷3     | 0.2%   | 0.6% | 1.0% | 3.6% | 2.9% | 0.0%       | 0.2% | 0.4% | 2.6% | 2.2%  | -      | 0.1% | 0.2% | 1.1% | 0.9% |        |
|                 | 3÷6     | 0.0%   | 0.2% | 1.2% | 2.7% | 2.7% | 0.0%       | 0.4% | 0.2% | 1.1% | 2.6%  | -      | 0.0% | 0.2% | 0.4% | 1.7% |        |
|                 | 6÷9     | 0.0%   | 0.0% | 0.0% | 1.6% | 3.8% | 0.0%       | 0.0% | 1.5% | 4.8% | 2.3%  | -      | 0.0% | 0.0% | 0.0% | 2.3% |        |
|                 | 9÷12    | 12.5%  | 0.0% | 0.0% | 4.2% | 0.0% | 0.0%       | 0.0% | 0.0% | 0.0% | 0.0%  | -      | 0.0% | 0.0% | 0.0% | 0.0% |        |
|                 | 12÷15   | -      | 0.0% | -    | 0.0% | 0.0% | -          | 0.0% | -    | 0.0% | 0.0%  | -      | 0.0% | -    | 0.0% | 0.0% |        |
| c)              |         | 1      | 2    | 3    | 4    | 5    | 1          | 2    | 3    | 4    | 5     | 1      | 2    | 3    | 4    | 5    |        |



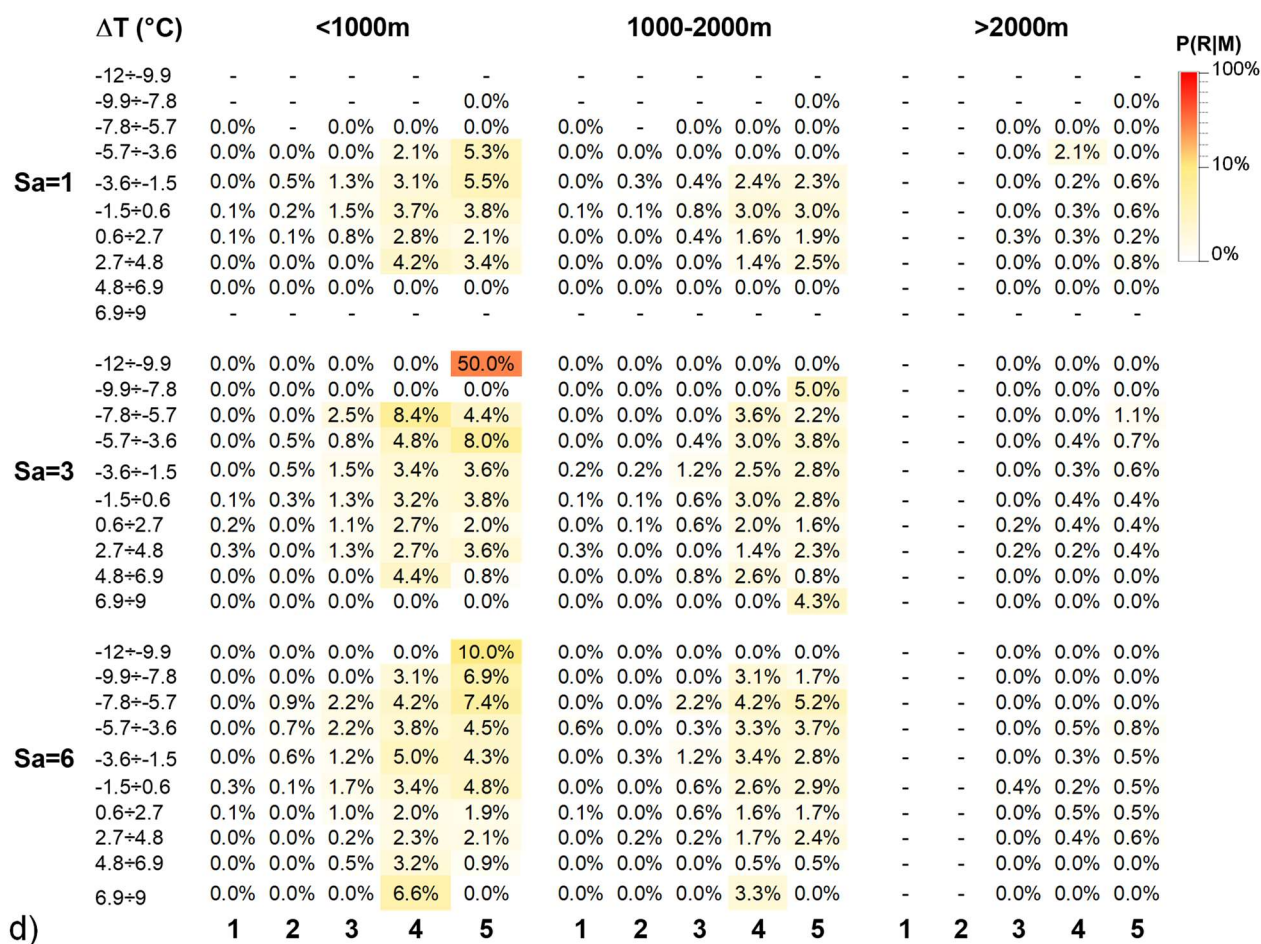

Fig. S25 Conditional probability,  $P(R|M)$ , calculated with Bayesian's method of temperature variations with different aggregation scales  $Sa$  (1, 3, 6) and for different altitudes ( $<1000m$ ,  $1000m-2000m$ ,  $>2000m$ ) for 5 decades (1=1970-1979; 2=1980-1989; 3=1990-1999; 4=2000-2009; 5=2010-2019). (a) winter; (b) spring; (c) summer (d) autumn.

## S2.4 Temperature amplitude

| T [°C] |      | <1000m |      |      |       |      | 1000-2000m |      |      |      |      | >2000m |   |      |   |      | P(R M) |
|--------|------|--------|------|------|-------|------|------------|------|------|------|------|--------|---|------|---|------|--------|
|        |      | 1      | 2    | 3    | 4     | 5    | 1          | 2    | 3    | 4    | 5    | 1      | 2 | 3    | 4 | 5    |        |
| Sa=0   | 0÷1  | 0.0%   | 0.7% | 0.9% | 4.5%  | 4.3% | -          | 0.1% | 0.1% | 1.4% | 1.1% | -      | - | 0.0% | - | 0.1% |        |
|        | 1÷2  | -      | -    | -    | -     | -    | -          | -    | -    | -    | -    | -      | - | -    | - | -    |        |
|        | 2÷3  | -      | -    | -    | -     | -    | -          | -    | -    | -    | -    | -      | - | -    | - | -    |        |
|        | 3÷4  | -      | -    | -    | -     | -    | -          | -    | -    | -    | -    | -      | - | -    | - | -    |        |
|        | 4÷5  | -      | -    | -    | -     | -    | -          | -    | -    | -    | -    | -      | - | -    | - | -    |        |
|        | 5÷6  | -      | -    | -    | -     | -    | -          | -    | -    | -    | -    | -      | - | -    | - | -    |        |
|        | 6÷7  | -      | -    | -    | -     | -    | -          | -    | -    | -    | -    | -      | - | -    | - | -    |        |
|        | 7÷8  | -      | -    | -    | -     | -    | -          | -    | -    | -    | -    | -      | - | -    | - | -    |        |
|        | 8÷9  | -      | -    | -    | -     | -    | -          | -    | -    | -    | -    | -      | - | -    | - | -    |        |
|        | 9÷10 | -      | -    | -    | -     | -    | -          | -    | -    | -    | -    | -      | - | -    | - | -    |        |
| Sa=7   | 0÷1  | 0.0%   | 0.2% | 0.4% | 3.1%  | 4.5% | -          | 0.2% | 0.0% | 1.1% | 1.5% | -      | - | 0.0% | - | 0.0% |        |
|        | 1÷2  | 0.0%   | 0.4% | 0.6% | 4.6%  | 3.8% | -          | 0.2% | 0.0% | 2.0% | 1.0% | -      | - | 0.0% | - | 0.0% |        |
|        | 2÷3  | 0.0%   | 0.0% | 1.0% | 6.6%  | 4.7% | -          | 0.0% | 0.0% | 2.3% | 0.9% | -      | - | 0.0% | - | 0.0% |        |
|        | 3÷4  | 0.4%   | 0.4% | 1.8% | 5.8%  | 6.3% | -          | 0.0% | 0.0% | 2.4% | 0.8% | -      | - | 0.0% | - | 0.4% |        |
|        | 4÷5  | 0.0%   | 0.7% | 2.2% | 5.8%  | 3.2% | -          | 0.0% | 0.0% | 0.5% | 0.6% | -      | - | 0.0% | - | 0.0% |        |
|        | 5÷6  | 0.0%   | 0.0% | 1.5% | 5.7%  | 4.9% | -          | 1.1% | 0.0% | 3.3% | 2.4% | -      | - | 0.0% | - | 0.0% |        |
|        | 6÷7  | 0.0%   | 0.0% | 2.4% | 2.6%  | 4.5% | -          | 0.0% | 0.0% | 0.0% | 2.3% | -      | - | 0.0% | - | 0.0% |        |
|        | 7÷8  | 0.0%   | 0.0% | 0.0% | 4.9%  | 6.4% | -          | 0.0% | 0.0% | 2.4% | 0.0% | -      | - | 0.0% | - | 0.0% |        |
|        | 8÷9  | 0.0%   | 0.0% | 3.4% | 0.0%  | 0.0% | -          | 0.0% | 0.0% | 3.6% | 0.0% | -      | - | 0.0% | - | 0.0% |        |
|        | 9÷10 | 0.0%   | 0.0% | 0.0% | 6.7%  | 0.0% | -          | 0.0% | 0.0% | 0.0% | 0.0% | -      | - | 0.0% | - | 0.0% |        |
| Sa=30  | 0÷1  | 0.0%   | 0.7% | 1.0% | 5.1%  | 4.8% | -          | 0.2% | 0.0% | 1.5% | 2.1% | -      | - | 0.0% | - | 0.0% |        |
|        | 1÷2  | 0.0%   | 0.0% | 0.9% | 4.9%  | 5.0% | -          | 0.0% | 0.0% | 2.2% | 1.4% | -      | - | 0.0% | - | 0.3% |        |
|        | 2÷3  | 0.0%   | 0.9% | 1.6% | 4.3%  | 2.4% | -          | 0.6% | 0.0% | 1.8% | 0.3% | -      | - | 0.0% | - | 0.0% |        |
|        | 3÷4  | 0.0%   | 0.8% | 1.6% | 8.0%  | 7.9% | -          | 0.0% | 0.0% | 1.3% | 0.8% | -      | - | 0.0% | - | 0.0% |        |
|        | 4÷5  | 0.6%   | 1.1% | 0.5% | 3.3%  | 2.7% | -          | 0.0% | 0.0% | 2.3% | 1.6% | -      | - | 0.0% | - | 0.0% |        |
|        | 5÷6  | 0.0%   | 0.0% | 1.5% | 4.4%  | 1.5% | -          | 0.0% | 0.0% | 1.8% | 0.0% | -      | - | 0.0% | - | 0.0% |        |
|        | 6÷7  | 0.0%   | 1.3% | 2.6% | 4.6%  | 4.6% | -          | 0.0% | 1.3% | 0.0% | 1.1% | -      | - | 1.3% | - | 0.0% |        |
|        | 7÷8  | 0.0%   | 0.0% | 0.0% | 2.0%  | 0.0% | -          | 0.0% | 0.0% | 0.0% | 1.8% | -      | - | 0.0% | - | 0.0% |        |
|        | 8÷9  | 0.0%   | 0.0% | 0.0% | 0.0%  | 7.1% | -          | 0.0% | 0.0% | 0.0% | 0.0% | -      | - | 0.0% | - | 0.0% |        |
|        | 9÷10 | 0.0%   | 0.0% | 0.0% | 15.4% | 0.0% | -          | 0.0% | 0.0% | 0.0% | 5.9% | -      | - | 0.0% | - | 0.0% |        |
| Sa=90  | 0÷1  | 0.0%   | 1.1% | 0.7% | 5.2%  | 2.7% | -          | 0.3% | 0.0% | 1.2% | 1.3% | -      | - | 0.0% | - | 0.3% |        |
|        | 1÷2  | 0.0%   | 0.3% | 1.4% | 4.3%  | 1.6% | -          | 0.0% | 0.0% | 1.0% | 1.9% | -      | - | 0.0% | - | 0.0% |        |
|        | 2÷3  | 0.0%   | 0.6% | 0.4% | 2.1%  | 3.0% | -          | 0.0% | 0.0% | 0.4% | 0.4% | -      | - | 0.0% | - | 0.0% |        |
|        | 3÷4  | 0.0%   | 1.2% | 0.9% | 4.5%  | 5.9% | -          | 0.0% | 0.0% | 1.6% | 1.4% | -      | - | 0.0% | - | 0.5% |        |
|        | 4÷5  | 0.6%   | 0.5% | 1.0% | 4.8%  | 3.3% | -          | 0.0% | 0.5% | 1.6% | 0.0% | -      | - | 0.5% | - | 0.0% |        |
|        | 5÷6  | 0.0%   | 0.0% | 0.6% | 2.4%  | 1.2% | -          | 0.0% | 0.0% | 1.6% | 1.2% | -      | - | 0.0% | - | 0.0% |        |
|        | 6÷7  | 0.0%   | 1.2% | 0.0% | 4.3%  | 3.0% | -          | 0.0% | 0.0% | 0.9% | 0.0% | -      | - | 0.0% | - | 0.0% |        |
|        | 7÷8  | 0.0%   | 0.0% | 0.0% | 4.0%  | 0.0% | -          | 0.0% | 0.0% | 1.3% | 1.2% | -      | - | 0.0% | - | 0.0% |        |
|        | 8÷9  | 0.0%   | 0.0% | 4.0% | 0.0%  | 1.5% | -          | 0.0% | 0.0% | 0.0% | 0.0% | -      | - | 0.0% | - | 0.0% |        |
|        | 9÷10 | 0.0%   | 0.0% | 0.0% | 4.0%  | 3.7% | -          | 0.0% | 0.0% | 4.0% | 0.0% | -      | - | 0.0% | - | 0.0% |        |

a)

| T [°C] |         | <1000m |      |      |       |       | 1000-2000m |      |      |       |       | >2000m |   |      |      |      | P(R M) |
|--------|---------|--------|------|------|-------|-------|------------|------|------|-------|-------|--------|---|------|------|------|--------|
|        |         | 0.1%   | 0.4% | 1.0% | 3.8%  | 4.6%  | 0.1%       | 0.2% | 0.5% | 2.4%  | 3.3%  | -      | - | 0.0% | 0.1% | 0.3% |        |
| Sa=0   | 0÷1.1   | 0.1%   | 0.4% | 1.0% | 3.8%  | 4.6%  | 0.1%       | 0.2% | 0.5% | 2.4%  | 3.3%  | -      | - | 0.0% | 0.1% | 0.3% |        |
|        | 1.1÷2.2 | -      | -    | -    | -     | -     | -          | -    | -    | -     | -     | -      | - | -    | -    | -    |        |
|        | 2.2÷3.3 | -      | -    | -    | -     | -     | -          | -    | -    | -     | -     | -      | - | -    | -    | -    |        |
|        | 3.3÷4.4 | -      | -    | -    | -     | -     | -          | -    | -    | -     | -     | -      | - | -    | -    | -    |        |
|        | 4.4÷5.5 | -      | -    | -    | -     | -     | -          | -    | -    | -     | -     | -      | - | -    | -    | -    |        |
|        | 5.5÷6.6 | -      | -    | -    | -     | -     | -          | -    | -    | -     | -     | -      | - | -    | -    | -    |        |
|        | 6.6÷7.7 | -      | -    | -    | -     | -     | -          | -    | -    | -     | -     | -      | - | -    | -    | -    |        |
|        | 7.7÷8.8 | -      | -    | -    | -     | -     | -          | -    | -    | -     | -     | -      | - | -    | -    | -    |        |
|        | 8.8÷9.9 | -      | -    | -    | -     | -     | -          | -    | -    | -     | -     | -      | - | -    | -    | -    |        |
|        | 9.9÷11  | -      | -    | -    | -     | -     | -          | -    | -    | -     | -     | -      | - | -    | -    | -    |        |
| Sa=7   | 0÷1.1   | 0.0%   | 0.8% | 0.2% | 2.9%  | 3.3%  | 0.0%       | 0.0% | 0.4% | 3.1%  | 4.2%  | -      | - | 0.2% | 0.2% | 0.2% |        |
|        | 1.1÷2.2 | 0.0%   | 0.4% | 0.8% | 2.1%  | 4.9%  | 0.2%       | 0.0% | 0.8% | 2.9%  | 1.5%  | -      | - | 0.0% | 0.5% | 0.5% |        |
|        | 2.2÷3.3 | 0.3%   | 0.3% | 1.3% | 3.0%  | 3.1%  | 0.3%       | 0.6% | 0.3% | 1.4%  | 2.3%  | -      | - | 0.0% | 0.3% | 0.6% |        |
|        | 3.3÷4.4 | 0.0%   | 0.5% | 0.4% | 5.0%  | 6.4%  | 0.0%       | 0.5% | 0.4% | 4.6%  | 2.3%  | -      | - | 0.0% | 0.0% | 0.0% |        |
|        | 4.4÷5.5 | 0.7%   | 0.0% | 1.2% | 4.3%  | 10.4% | 0.0%       | 0.0% | 1.2% | 1.9%  | 3.9%  | -      | - | 0.0% | 0.0% | 0.0% |        |
|        | 5.5÷6.6 | 0.0%   | 0.0% | 0.9% | 5.5%  | 4.1%  | 0.0%       | 0.0% | 0.9% | 5.5%  | 4.1%  | -      | - | 0.0% | 0.0% | 0.8% |        |
|        | 6.6÷7.7 | 0.0%   | 0.0% | 0.0% | 5.3%  | 10.8% | 0.0%       | 3.1% | 0.0% | 1.8%  | 6.2%  | -      | - | 0.0% | 0.0% | 1.5% |        |
|        | 7.7÷8.8 | 0.0%   | 0.0% | 0.0% | 11.4% | 16.1% | 0.0%       | 0.0% | 0.0% | 5.7%  | 9.7%  | -      | - | 0.0% | 0.0% | 3.2% |        |
|        | 8.8÷9.9 | 0.0%   | 0.0% | 0.0% | 11.8% | 23.1% | 0.0%       | 0.0% | 0.0% | 0.0%  | 7.7%  | -      | - | 0.0% | 0.0% | 0.0% |        |
|        | 9.9÷11  | -      | 0.0% | 0.0% | 0.0%  | 0.0%  | -          | 0.0% | 0.0% | 0.0%  | 0.0%  | -      | - | 0.0% | 0.0% | 0.0% |        |
| Sa=30  | 0÷1.1   | 0.0%   | 0.4% | 1.2% | 5.1%  | 4.6%  | 0.2%       | 0.0% | 0.5% | 2.0%  | 3.6%  | -      | - | 0.0% | 0.0% | 0.0% |        |
|        | 1.1÷2.2 | 0.0%   | 0.0% | 0.3% | 3.2%  | 3.0%  | 0.2%       | 0.5% | 0.0% | 1.7%  | 3.3%  | -      | - | 0.0% | 0.7% | 0.5% |        |
|        | 2.2÷3.3 | 0.0%   | 0.0% | 0.3% | 5.6%  | 2.3%  | 0.0%       | 0.0% | 0.3% | 2.9%  | 2.0%  | -      | - | 0.0% | 0.3% | 0.3% |        |
|        | 3.3÷4.4 | 0.0%   | 0.0% | 0.0% | 3.2%  | 4.4%  | 0.0%       | 0.0% | 0.9% | 2.0%  | 2.7%  | -      | - | 0.0% | 0.4% | 0.9% |        |
|        | 4.4÷5.5 | 0.0%   | 0.0% | 0.5% | 3.3%  | 6.1%  | 0.6%       | 1.3% | 0.5% | 2.7%  | 3.9%  | -      | - | 0.0% | 0.0% | 0.0% |        |
|        | 5.5÷6.6 | 1.3%   | 1.0% | 0.8% | 5.4%  | 9.1%  | 0.0%       | 0.0% | 1.7% | 3.2%  | 1.8%  | -      | - | 0.0% | 0.0% | 0.9% |        |
|        | 6.6÷7.7 | 0.0%   | 0.0% | 1.6% | 5.1%  | 11.7% | 0.0%       | 0.0% | 0.0% | 5.1%  | 1.3%  | -      | - | 0.0% | 0.0% | 0.0% |        |
|        | 7.7÷8.8 | 0.0%   | 0.0% | 3.5% | 6.9%  | 6.1%  | 0.0%       | 0.0% | 0.0% | 20.7% | 6.1%  | -      | - | 0.0% | 0.0% | 0.0% |        |
|        | 8.8÷9.9 | 0.0%   | 0.0% | 0.0% | 4.8%  | 28.6% | 0.0%       | 0.0% | 0.0% | 4.8%  | 0.0%  | -      | - | 0.0% | 0.0% | 0.0% |        |
|        | 9.9÷11  | 0.0%   | 0.0% | 0.0% | 0.0%  | 7.7%  | 0.0%       | 0.0% | 0.0% | 0.0%  | 0.0%  | -      | - | 0.0% | 0.0% | 0.0% |        |
| Sa=90  | 0÷1.1   | 0.0%   | 0.0% | 0.9% | 5.9%  | 2.8%  | 0.0%       | 0.5% | 0.0% | 1.4%  | 2.8%  | -      | - | -    | -    | -    |        |
|        | 1.1÷2.2 | 0.0%   | 0.5% | 0.6% | 4.2%  | 5.6%  | 0.0%       | 0.0% | 0.3% | 3.0%  | 5.3%  | -      | - | 0.0% | 0.0% | 0.0% |        |
|        | 2.2÷3.3 | 0.0%   | 0.9% | 1.9% | 4.0%  | 6.8%  | 0.0%       | 0.3% | 0.4% | 4.0%  | 0.4%  | -      | - | 0.0% | 0.6% | 0.0% |        |
|        | 3.3÷4.4 | 0.0%   | 0.8% | 0.0% | 4.9%  | 6.7%  | 0.0%       | 0.0% | 1.7% | 4.1%  | 7.1%  | -      | - | 0.0% | 0.0% | 1.4% |        |
|        | 4.4÷5.5 | 0.6%   | 0.5% | 2.0% | 6.2%  | 7.9%  | 0.0%       | 0.0% | 0.5% | 1.7%  | 6.4%  | -      | - | 0.0% | 0.8% | 0.0% |        |
|        | 5.5÷6.6 | 0.8%   | 0.0% | 0.0% | 5.5%  | 6.9%  | 0.0%       | 0.9% | 0.0% | 3.9%  | 3.1%  | -      | - | 0.0% | 0.0% | 1.5% |        |
|        | 6.6÷7.7 | 0.0%   | 1.4% | 0.9% | 9.9%  | 12.6% | 1.1%       | 0.0% | 0.0% | 11.9% | 8.4%  | -      | - | 0.0% | 0.0% | 0.0% |        |
|        | 7.7÷8.8 | 0.0%   | 0.0% | 0.0% | 3.8%  | 5.8%  | 0.0%       | 2.5% | 0.0% | 3.8%  | 2.3%  | -      | - | 0.0% | 0.0% | 0.0% |        |
|        | 8.8÷9.9 | 0.0%   | 0.0% | 5.6% | 0.0%  | 16.7% | 0.0%       | 0.0% | 0.0% | 0.0%  | 13.3% | -      | - | 0.0% | 1.9% | 0.0% |        |
|        | 9.9÷11  | 0.0%   | 0.0% | 0.0% | 11.1% | 11.8% | 0.0%       | 0.0% | 5.3% | 11.1% | 11.8% | -      | - | 0.0% | 0.0% | 0.0% |        |

b)

1 2 3 4 5 1 2 3 4 5 1 2 3 4 5



|              |          |          |          |          |          |          |          |          |          |          |          |          |          |          |          |          |
|--------------|----------|----------|----------|----------|----------|----------|----------|----------|----------|----------|----------|----------|----------|----------|----------|----------|
| <b>Sa=0</b>  | 0÷1.2    | 0.1%     | 0.5%     | 0.9%     | 3.4%     | 3.2%     | 0.0%     | 0.2%     | 0.5%     | 2.4%     | 2.7%     | -        | 0.1%     | 0.2%     | 0.6%     | 1.1%     |
|              | 1.2÷2.4  | -        | -        | -        | -        | -        | -        | -        | -        | -        | -        | -        | -        | -        | -        | -        |
|              | 2.4÷3.6  | -        | -        | -        | -        | -        | -        | -        | -        | -        | -        | -        | -        | -        | -        | -        |
|              | 3.6÷4.8  | -        | -        | -        | -        | -        | -        | -        | -        | -        | -        | -        | -        | -        | -        | -        |
|              | 4.8÷6    | -        | -        | -        | -        | -        | -        | -        | -        | -        | -        | -        | -        | -        | -        | -        |
|              | 6÷7.2    | -        | -        | -        | -        | -        | -        | -        | -        | -        | -        | -        | -        | -        | -        | -        |
|              | 7.2÷8.4  | -        | -        | -        | -        | -        | -        | -        | -        | -        | -        | -        | -        | -        | -        | -        |
|              | 8.4÷9.6  | -        | -        | -        | -        | -        | -        | -        | -        | -        | -        | -        | -        | -        | -        | -        |
|              | 9.6÷10.8 | -        | -        | -        | -        | -        | -        | -        | -        | -        | -        | -        | -        | -        | -        | -        |
|              | 10.8÷12  | -        | -        | -        | -        | -        | -        | -        | -        | -        | -        | -        | -        | -        | -        | -        |
| <b>Sa=7</b>  | 0÷1.2    | 0.2%     | 0.3%     | 1.1%     | 4.4%     | 3.0%     | 0.0%     | 0.2%     | 0.9%     | 2.1%     | 2.2%     | -        | 0.0%     | 0.2%     | 1.0%     | 0.8%     |
|              | 1.2÷2.4  | 0.2%     | 0.2%     | 0.9%     | 4.0%     | 2.7%     | 0.0%     | 0.2%     | 0.7%     | 2.9%     | 2.3%     | -        | 0.0%     | 0.0%     | 0.9%     | 1.6%     |
|              | 2.4÷3.6  | 0.0%     | 0.6%     | 1.0%     | 3.4%     | 2.4%     | 0.0%     | 0.0%     | 0.0%     | 2.7%     | 2.7%     | -        | 0.0%     | 0.0%     | 0.3%     | 1.2%     |
|              | 3.6÷4.8  | 0.0%     | 0.0%     | 0.8%     | 2.4%     | 3.8%     | 0.0%     | 0.5%     | 0.4%     | 1.2%     | 2.4%     | -        | 0.0%     | 0.0%     | 1.2%     | 1.4%     |
|              | 4.8÷6    | 0.8%     | 0.0%     | 0.6%     | 1.3%     | 4.3%     | 0.0%     | 0.0%     | 0.0%     | 0.6%     | 0.0%     | -        | 0.0%     | 0.0%     | 0.0%     | 1.8%     |
|              | 6÷7.2    | 0.0%     | 0.0%     | 0.0%     | 4.5%     | 2.0%     | 0.0%     | 1.6%     | 0.0%     | 2.2%     | 2.0%     | -        | 0.0%     | 1.0%     | 0.0%     | 0.0%     |
|              | 7.2÷8.4  | 0.0%     | 0.0%     | 0.0%     | 0.0%     | 2.1%     | 0.0%     | 0.0%     | 0.0%     | 0.0%     | 4.3%     | -        | 0.0%     | 0.0%     | 0.0%     | 0.0%     |
|              | 8.4÷9.6  | 0.0%     | 0.0%     | 0.0%     | 3.6%     | 0.0%     | 0.0%     | 0.0%     | 0.0%     | 0.0%     | 0.0%     | -        | 0.0%     | 0.0%     | 3.6%     | 4.5%     |
|              | 9.6÷10.8 | -        | 0.0%     | 0.0%     | 0.0%     | 0.0%     | -        | 0.0%     | 0.0%     | 0.0%     | 0.0%     | -        | 0.0%     | 0.0%     | 0.0%     | 0.0%     |
|              | 10.8÷12  | -        | -        | 0.0%     | 0.0%     | 0.0%     | -        | -        | 0.0%     | 0.0%     | 0.0%     | -        | -        | 0.0%     | 0.0%     | 0.0%     |
| <b>Sa=30</b> | 0÷1.2    | 0.2%     | 0.6%     | 1.1%     | 4.1%     | 3.9%     | 0.0%     | 0.2%     | 0.4%     | 2.0%     | 2.0%     | -        | 0.0%     | 0.6%     | 0.8%     | 1.5%     |
|              | 1.2÷2.4  | 0.0%     | 0.4%     | 0.2%     | 5.5%     | 2.8%     | 0.0%     | 0.0%     | 1.2%     | 3.7%     | 1.2%     | -        | 0.0%     | 0.0%     | 0.7%     | 1.4%     |
|              | 2.4÷3.6  | 0.0%     | 0.6%     | 1.6%     | 3.6%     | 1.5%     | 0.0%     | 0.6%     | 0.3%     | 1.8%     | 2.6%     | -        | 0.0%     | 0.3%     | 0.3%     | 0.3%     |
|              | 3.6÷4.8  | 0.0%     | 0.4%     | 0.4%     | 2.3%     | 2.6%     | 0.0%     | 0.4%     | 0.0%     | 1.1%     | 3.5%     | -        | 0.0%     | 0.0%     | 1.5%     | 1.8%     |
|              | 4.8÷6    | 0.7%     | 0.7%     | 1.2%     | 1.3%     | 3.0%     | 0.0%     | 0.7%     | 0.6%     | 3.3%     | 2.4%     | -        | 0.0%     | 0.0%     | 0.0%     | 1.2%     |
|              | 6÷7.2    | 0.0%     | 0.0%     | 1.2%     | 0.0%     | 0.9%     | 0.0%     | 0.0%     | 2.4%     | 0.0%     | 0.9%     | -        | 0.0%     | 0.0%     | 0.0%     | 0.0%     |
|              | 7.2÷8.4  | 0.0%     | 0.0%     | 0.0%     | 3.9%     | 7.8%     | 0.0%     | 0.0%     | 0.0%     | 2.0%     | 0.0%     | -        | 0.0%     | 0.0%     | 3.9%     | 0.0%     |
|              | 8.4÷9.6  | 0.0%     | 0.0%     | 0.0%     | 4.0%     | 0.0%     | 0.0%     | 0.0%     | 0.0%     | 0.0%     | 0.0%     | -        | 0.0%     | 0.0%     | 0.0%     | 0.0%     |
|              | 9.6÷10.8 | 0.0%     | 0.0%     | 0.0%     | 0.0%     | 0.0%     | 0.0%     | 0.0%     | 0.0%     | 0.0%     | 0.0%     | -        | 0.0%     | 0.0%     | 0.0%     | 0.0%     |
|              | 10.8÷12  | -        | 0.0%     | 0.0%     | 0.0%     | 0.0%     | -        | 0.0%     | 0.0%     | 0.0%     | 0.0%     | -        | 0.0%     | 0.0%     | 0.0%     | 0.0%     |
| <b>Sa=90</b> | 0÷1.2    | 0.2%     | 0.0%     | 0.8%     | 3.8%     | 3.2%     | 0.0%     | 0.2%     | 1.1%     | 2.3%     | 3.0%     | -        | 0.2%     | 0.3%     | 1.3%     | 2.4%     |
|              | 1.2÷2.4  | 0.0%     | 0.8%     | 1.2%     | 4.5%     | 3.1%     | 0.0%     | 0.3%     | 0.9%     | 3.6%     | 3.4%     | -        | 0.0%     | 0.0%     | 0.8%     | 1.7%     |
|              | 2.4÷3.6  | 0.0%     | 0.3%     | 1.4%     | 2.2%     | 3.1%     | 0.0%     | 0.6%     | 0.4%     | 3.2%     | 1.7%     | -        | 0.0%     | 0.4%     | 0.6%     | 1.0%     |
|              | 3.6÷4.8  | 0.0%     | 0.8%     | 0.4%     | 4.8%     | 5.7%     | 0.0%     | 0.0%     | 0.8%     | 2.4%     | 5.3%     | -        | 0.0%     | 0.4%     | 0.8%     | 0.4%     |
|              | 4.8÷6    | 0.7%     | 1.1%     | 1.4%     | 2.5%     | 3.6%     | 0.0%     | 0.5%     | 0.5%     | 1.9%     | 4.6%     | -        | 0.0%     | 0.5%     | 1.3%     | 2.0%     |
|              | 6÷7.2    | 0.0%     | 0.0%     | 1.5%     | 4.4%     | 4.2%     | 0.0%     | 0.0%     | 0.0%     | 0.7%     | 5.0%     | -        | 0.0%     | 0.0%     | 0.0%     | 1.7%     |
|              | 7.2÷8.4  | 0.0%     | 0.0%     | 0.0%     | 5.6%     | 1.0%     | 0.0%     | 0.0%     | 1.0%     | 2.8%     | 2.0%     | -        | 0.0%     | 0.0%     | 2.8%     | 4.0%     |
|              | 8.4÷9.6  | 0.0%     | 0.0%     | 0.0%     | 0.0%     | 6.4%     | 0.0%     | 0.0%     | 0.0%     | 0.0%     | 2.1%     | -        | 0.0%     | 0.0%     | 0.0%     | 2.1%     |
|              | 9.6÷10.8 | 0.0%     | 0.0%     | 0.0%     | 0.0%     | 4.2%     | 0.0%     | 0.0%     | 4.5%     | 3.2%     | 0.0%     | -        | 0.0%     | 0.0%     | 0.0%     | 0.0%     |
|              | 10.8÷12  | -        | 0.0%     | 0.0%     | 0.0%     | 0.0%     | -        | 0.0%     | 0.0%     | 0.0%     | 0.0%     | -        | 0.0%     | 0.0%     | 0.0%     | 0.0%     |
| <b>c)</b>    |          | <b>1</b> | <b>2</b> | <b>3</b> | <b>4</b> | <b>5</b> | <b>1</b> | <b>2</b> | <b>3</b> | <b>4</b> | <b>5</b> | <b>1</b> | <b>2</b> | <b>3</b> | <b>4</b> | <b>5</b> |

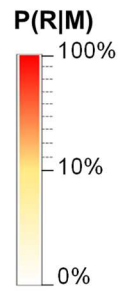

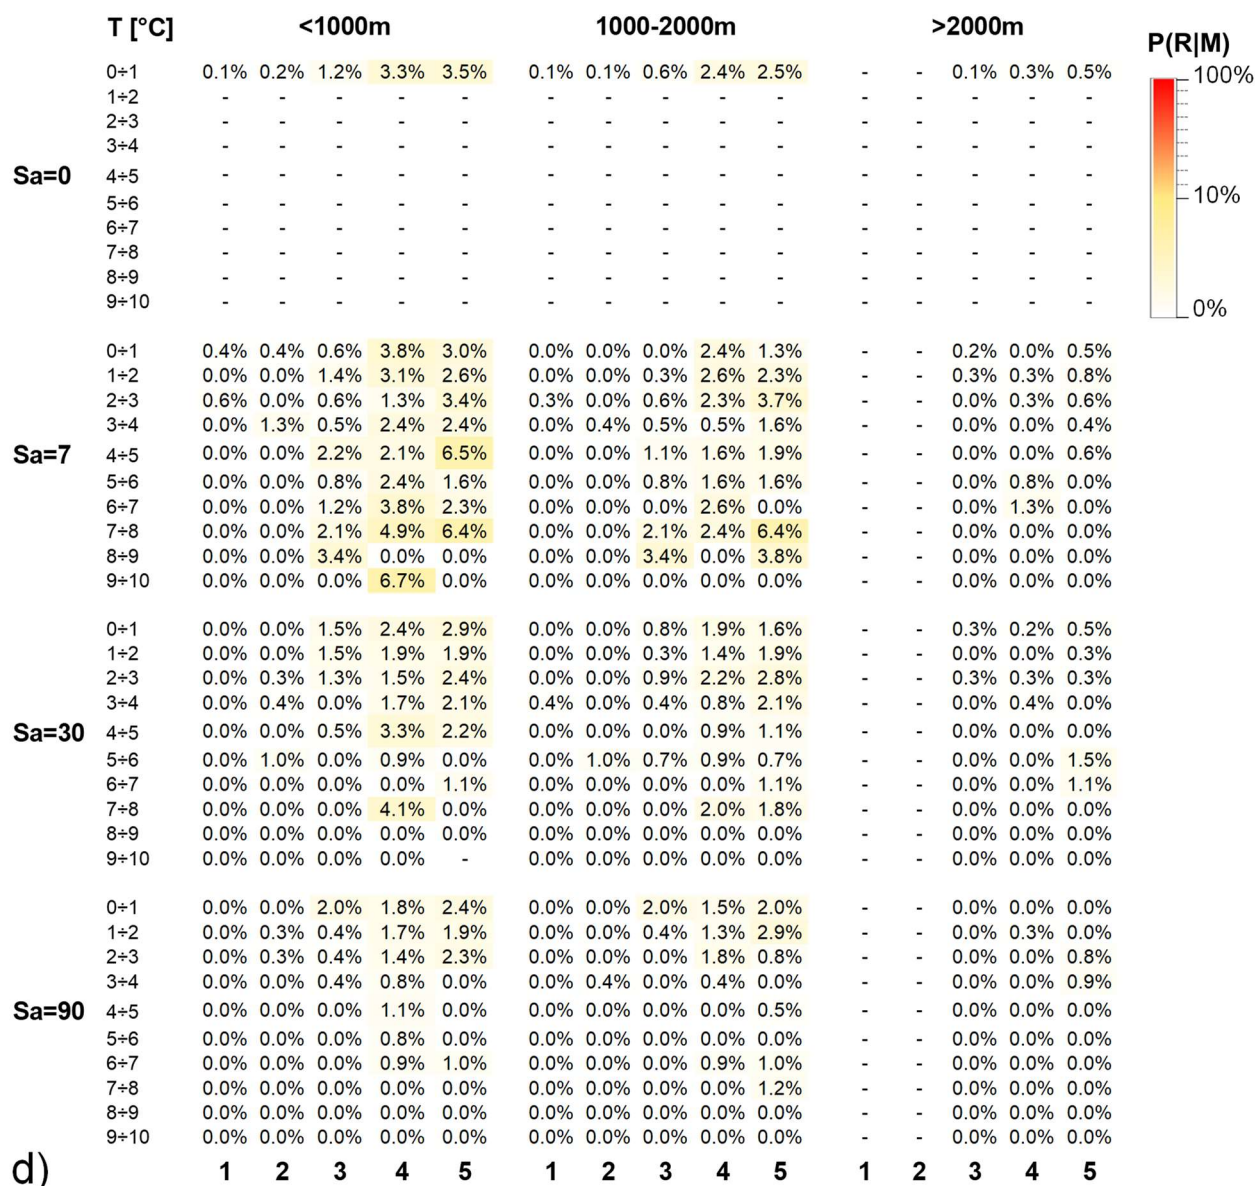

Fig. S26 Conditional probability,  $P(R|M)$ , calculated with Bayesian's method of temperature amplitudes with different aggregation scales  $S_a$  (0, 7, 30, 90) and for different altitudes (<1000m, 1000m-2000m, >2000m) for 5 decades (1=1970-1979; 2=1980-1989; 3=1990-1999; 4=2000-2009; 5=2010-2019). (a) winter; (b) spring; (c) summer (d) autumn.



## S2.5 Freeze-Thaw cycle

### S2.5.1 Maximum

| FT<br>[n. days] |    | <1000m |       |       |       |       | 1000-2000m |      |      |      |       | >2000m |   |      |   |      | P(R M) |
|-----------------|----|--------|-------|-------|-------|-------|------------|------|------|------|-------|--------|---|------|---|------|--------|
|                 |    |        |       |       |       |       |            |      |      |      |       |        |   |      |   |      |        |
| Sa=0            | 0  | 0.0%   | 0.7%  | 0.8%  | 4.0%  | 4.2%  | -          | 0.1% | 0.1% | 1.2% | 1.1%  | -      | - | 0.0% | - | 0.1% |        |
|                 | 1  | 0.0%   | 0.7%  | 2.5%  | 11.3% | 8.9%  | -          | 0.7% | 0.0% | 4.2% | 0.0%  | -      | - | 0.0% | - | 0.0% |        |
| Sa=7            | 0  | 0.0%   | 0.5%  | 0.7%  | 3.4%  | 3.9%  | -          | 0.1% | 0.1% | 1.2% | 1.1%  | -      | - | 0.0% | - | 0.1% |        |
|                 | 1  | 0.0%   | 2.5%  | 2.8%  | 12.1% | 18.5% | -          | 1.6% | 0.0% | 3.4% | 3.1%  | -      | - | 0.0% | - | 0.0% |        |
|                 | 2  | 0.0%   | 2.4%  | 4.7%  | 11.9% | 6.3%  | -          | 0.0% | 0.0% | 5.0% | 0.0%  | -      | - | 0.0% | - | 0.0% |        |
|                 | 3  | 0.0%   | 5.9%  | 3.5%  | 18.5% | 14.3% | -          | 0.0% | 0.0% | 0.0% | 14.3% | -      | - | 0.0% | - | 0.0% |        |
|                 | 4  | 0.0%   | 0.0%  | 0.0%  | 17.6% | 9.1%  | -          | 0.0% | 0.0% | 0.0% | 0.0%  | -      | - | 0.0% | - | 0.0% |        |
|                 | 5  | 0.0%   | 5.9%  | 2.8%  | 20.6% | 7.1%  | -          | 0.0% | 0.0% | 2.9% | 0.0%  | -      | - | 0.0% | - | 0.0% |        |
|                 | 6  | 0.0%   | 0.0%  | 0.0%  | 0.0%  | 0.0%  | -          | 0.0% | 0.0% | 0.0% | 0.0%  | -      | - | 0.0% | - | 0.0% |        |
|                 | 7  | 0.0%   | 0.0%  | 0.0%  | 0.0%  | 8.3%  | -          | 0.0% | 0.0% | 0.0% | 0.0%  | -      | - | 0.0% | - | 0.0% |        |
| Sa=30           | 0  | 0.0%   | 0.3%  | 0.1%  | 1.6%  | 3.2%  | -          | 0.1% | 0.0% | 0.9% | 0.9%  | -      | - | 0.0% | - | 0.1% |        |
|                 | 1  | 0.0%   | 3.7%  | 3.5%  | 12.9% | 8.8%  | -          | 0.7% | 0.0% | 3.8% | 2.6%  | -      | - | 0.0% | - | 0.9% |        |
|                 | 2  | 0.5%   | 0.0%  | 1.3%  | 7.1%  | 11.1% | -          | 0.0% | 0.0% | 1.2% | 2.5%  | -      | - | 0.0% | - | 0.0% |        |
|                 | 3  | 0.0%   | 2.2%  | 4.6%  | 23.7% | 11.1% | -          | 0.0% | 0.0% | 1.3% | 11.1% | -      | - | 0.0% | - | 0.0% |        |
|                 | 4  | 0.0%   | 2.5%  | 6.1%  | 14.7% | 26.7% | -          | 1.3% | 1.2% | 4.4% | 6.7%  | -      | - | 0.0% | - | 0.0% |        |
|                 | 5  | 0.0%   | 0.0%  | 3.9%  | 24.1% | 18.8% | -          | 0.0% | 1.6% | 8.6% | 1.4%  | -      | - | 0.0% | - | 0.0% |        |
|                 | 6  | 0.0%   | 0.0%  | 5.0%  | 26.7% | 41.2% | -          | 0.0% | 0.0% | 0.0% | 11.8% | -      | - | 0.0% | - | 0.0% |        |
|                 | 7  | 0.0%   | 0.0%  | 0.0%  | 27.7% | 5.6%  | -          | 0.0% | 0.0% | 8.5% | 0.0%  | -      | - | 0.0% | - | 0.0% |        |
|                 | 8  | 0.0%   | 0.0%  | 0.0%  | 11.1% | 0.0%  | -          | 0.0% | 0.0% | 0.0% | 0.0%  | -      | - | 0.0% | - | 0.0% |        |
|                 | 9  | 0.0%   | 3.3%  | 0.0%  | 12.5% | 25.0% | -          | 0.0% | 3.4% | 0.0% | 0.0%  | -      | - | 3.4% | - | 0.0% |        |
|                 | 10 | 0.0%   | 12.5% | 0.0%  | 13.5% | 0.0%  | -          | 0.0% | 0.0% | 0.0% | 0.0%  | -      | - | 0.0% | - | 0.0% |        |
|                 | 11 | 0.0%   | 0.0%  | 0.0%  | 22.7% | 0.0%  | -          | 0.0% | 0.0% | 4.5% | 0.0%  | -      | - | 0.0% | - | 0.0% |        |
|                 | 12 | 0.0%   | 0.0%  | 0.0%  | 0.0%  | 0.0%  | -          | 0.0% | 0.0% | 0.0% | 0.0%  | -      | - | 0.0% | - | 0.0% |        |
|                 | 13 | 0.0%   | 0.0%  | 0.0%  | 5.3%  | 7.1%  | -          | 0.0% | 0.0% | 0.0% | 7.1%  | -      | - | 0.0% | - | 0.0% |        |
|                 | 14 | 0.0%   | 15.4% | 12.5% | 0.0%  | 0.0%  | -          | 0.0% | 0.0% | 0.0% | 0.0%  | -      | - | 0.0% | - | 0.0% |        |
|                 | 15 | 0.0%   | -     | 20.0% | 0.0%  | 0.0%  | -          | -    | 0.0% | 0.0% | 0.0%  | -      | - | 0.0% | - | 0.0% |        |
|                 | 16 | -      | -     | 0.0%  | -     | -     | -          | -    | 0.0% | -    | -     | -      | - | 0.0% | - | -    |        |
|                 | 17 | -      | -     | 50.0% | -     | -     | -          | -    | 0.0% | -    | -     | -      | - | 0.0% | - | -    |        |
|                 | 18 | -      | -     | 0.0%  | -     | -     | -          | -    | 0.0% | -    | -     | -      | - | 0.0% | - | -    |        |
|                 | 19 | -      | -     | 0.0%  | -     | -     | -          | -    | 0.0% | -    | -     | -      | - | 0.0% | - | -    |        |
|                 | 20 | -      | -     | -     | -     | -     | -          | -    | -    | -    | -     | -      | - | -    | - | -    |        |
|                 | 21 | -      | -     | -     | -     | -     | -          | -    | -    | -    | -     | -      | - | -    | - | -    |        |
|                 | 22 | -      | -     | -     | -     | -     | -          | -    | -    | -    | -     | -      | - | -    | - | -    |        |
|                 | 23 | -      | -     | -     | -     | -     | -          | -    | -    | -    | -     | -      | - | -    | - | -    |        |
|                 | 24 | -      | -     | -     | -     | -     | -          | -    | -    | -    | -     | -      | - | -    | - | -    |        |
|                 | 25 | -      | -     | -     | -     | -     | -          | -    | -    | -    | -     | -      | - | -    | - | -    |        |
|                 | 26 | -      | -     | -     | -     | -     | -          | -    | -    | -    | -     | -      | - | -    | - | -    |        |
|                 | 27 | -      | -     | -     | -     | -     | -          | -    | -    | -    | -     | -      | - | -    | - | -    |        |
|                 | 28 | -      | -     | -     | -     | -     | -          | -    | -    | -    | -     | -      | - | -    | - | -    |        |
|                 | 29 | -      | -     | -     | -     | -     | -          | -    | -    | -    | -     | -      | - | -    | - | -    |        |
|                 | 30 | -      | -     | -     | -     | -     | -          | -    | -    | -    | -     | -      | - | -    | - | -    |        |
| a)              |    | 1      | 2     | 3     | 4     | 5     | 1          | 2    | 3    | 4    | 5     | 1      | 2 | 3    | 4 | 5    |        |

| FT<br>[n. days] |    | <1000m |      |      |       |       | 1000-2000m |      |      |      |       | >2000m |   |      |      |      | P(R M) |
|-----------------|----|--------|------|------|-------|-------|------------|------|------|------|-------|--------|---|------|------|------|--------|
|                 |    |        |      |      |       |       |            |      |      |      |       |        |   |      |      |      |        |
| Sa=0            | 0  | 0.1%   | 0.5% | 1.0% | 3.9%  | 4.7%  | 0.1%       | 0.2% | 0.6% | 2.5% | 3.4%  | -      | - | 0.0% | 0.1% | 0.3% |        |
|                 | 1  | 0.0%   | 0.0% | 0.0% | 1.8%  | 0.0%  | 0.0%       | 0.0% | 0.0% | 0.6% | 0.0%  | -      | - | 0.0% | 0.0% | 0.0% |        |
| Sa=7            | 0  | 0.1%   | 0.5% | 1.1% | 4.1%  | 4.8%  | 0.1%       | 0.2% | 0.6% | 2.7% | 3.5%  | -      | - | 0.0% | 0.2% | 0.3% |        |
|                 | 1  | 0.0%   | 0.0% | 0.0% | 2.0%  | 1.5%  | 0.0%       | 0.0% | 0.0% | 0.0% | 0.0%  | -      | - | 0.0% | 0.0% | 0.0% |        |
|                 | 2  | 0.0%   | 0.0% | 0.0% | 3.0%  | 0.0%  | 0.0%       | 0.0% | 0.0% | 1.0% | 0.0%  | -      | - | 0.0% | 0.0% | 0.0% |        |
|                 | 3  | 0.0%   | 0.0% | 0.0% | 0.0%  | 0.0%  | 0.0%       | 0.0% | 0.0% | 0.0% | 0.0%  | -      | - | 0.0% | 0.0% | 0.0% |        |
|                 | 4  | 0.0%   | 0.0% | 0.0% | 0.0%  | 0.0%  | 0.0%       | 0.0% | 0.0% | 2.9% | 0.0%  | -      | - | 0.0% | 0.0% | 0.0% |        |
|                 | 5  | 0.0%   | 0.0% | 0.0% | 2.9%  | 0.0%  | 0.0%       | 0.0% | 0.0% | 0.0% | 0.0%  | -      | - | 0.0% | 0.0% | 0.0% |        |
|                 | 6  | 0.0%   | 0.0% | 0.0% | 0.0%  | 0.0%  | 0.0%       | 0.0% | 0.0% | 0.0% | 0.0%  | -      | - | 0.0% | 0.0% | 0.0% |        |
|                 | 7  | 0.0%   | 0.0% | 0.0% | 0.0%  | 0.0%  | 0.0%       | 0.0% | 0.0% | 0.0% | 0.0%  | -      | - | 0.0% | 0.0% | 0.0% |        |
| Sa=30           | 0  | 0.1%   | 0.4% | 1.1% | 3.7%  | 4.6%  | 0.1%       | 0.3% | 0.6% | 2.5% | 3.4%  | -      | - | 0.0% | 0.2% | 0.4% |        |
|                 | 1  | 0.0%   | 0.0% | 0.0% | 2.9%  | 6.1%  | 0.0%       | 0.0% | 0.5% | 2.4% | 6.1%  | -      | - | 0.0% | 0.0% | 0.0% |        |
|                 | 2  | 0.0%   | 1.8% | 0.0% | 10.7% | 0.0%  | 0.0%       | 0.0% | 0.0% | 4.1% | 0.0%  | -      | - | 0.0% | 0.0% | 0.0% |        |
|                 | 3  | 0.0%   | 0.0% | 0.0% | 0.0%  | 11.1% | 0.0%       | 0.0% | 0.8% | 0.0% | 11.1% | -      | - | 0.0% | 0.0% | 0.0% |        |
|                 | 4  | 0.0%   | 0.0% | 3.7% | 1.5%  | 0.0%  | 0.0%       | 0.0% | 0.0% | 0.0% | 0.0%  | -      | - | 0.0% | 0.0% | 0.0% |        |
|                 | 5  | 0.0%   | 5.4% | 0.8% | 1.7%  | 10.1% | 0.0%       | 0.0% | 0.0% | 0.0% | 2.9%  | -      | - | 0.0% | 0.0% | 0.0% |        |
|                 | 6  | 0.0%   | 0.0% | 2.5% | 3.3%  | 0.0%  | 0.0%       | 0.0% | 0.0% | 0.0% | 5.9%  | -      | - | 0.0% | 0.0% | 0.0% |        |
|                 | 7  | 0.0%   | 0.0% | 0.0% | 6.4%  | 0.0%  | 0.0%       | 0.0% | 0.0% | 2.1% | 0.0%  | -      | - | 0.0% | 0.0% | 0.0% |        |
|                 | 8  | 0.0%   | 0.0% | 0.0% | 7.4%  | 0.0%  | 0.0%       | 0.0% | 0.0% | 7.4% | 0.0%  | -      | - | 0.0% | 0.0% | 0.0% |        |
|                 | 9  | 11.1%  | 0.0% | 0.0% | 0.0%  | 0.0%  | 0.0%       | 0.0% | 0.0% | 0.0% | 0.0%  | -      | - | 0.0% | 0.0% | 0.0% |        |
|                 | 10 | 3.6%   | 0.0% | 0.0% | 8.1%  | 0.0%  | 3.6%       | 0.0% | 0.0% | 5.4% | 0.0%  | -      | - | 0.0% | 0.0% | 0.0% |        |
|                 | 11 | 0.0%   | 0.0% | 0.0% | 0.0%  | 0.0%  | 0.0%       | 0.0% | 0.0% | 0.0% | 0.0%  | -      | - | 0.0% | 0.0% | 0.0% |        |
|                 | 12 | 0.0%   | 0.0% | 0.0% | 0.0%  | 0.0%  | 0.0%       | 0.0% | 0.0% | 9.1% | 0.0%  | -      | - | 0.0% | 0.0% | 0.0% |        |
|                 | 13 | 0.0%   | 0.0% | 0.0% | 5.3%  | 7.1%  | 0.0%       | 0.0% | 0.0% | 0.0% | 0.0%  | -      | - | 0.0% | 0.0% | 0.0% |        |
|                 | 14 | 0.0%   | 0.0% | 0.0% | 0.0%  | 0.0%  | 0.0%       | 0.0% | 0.0% | 0.0% | 0.0%  | -      | - | 0.0% | 0.0% | 0.0% |        |
|                 | 15 | 0.0%   | -    | 0.0% | 0.0%  | 0.0%  | 0.0%       | -    | 0.0% | 0.0% | 0.0%  | -      | - | 0.0% | 0.0% | 0.0% |        |
|                 | 16 | -      | -    | 0.0% | -     | -     | -          | -    | 0.0% | -    | -     | -      | - | 0.0% | -    | -    |        |
|                 | 17 | -      | -    | 0.0% | -     | -     | -          | -    | 0.0% | -    | -     | -      | - | 0.0% | -    | -    |        |
|                 | 18 | -      | -    | 0.0% | -     | -     | -          | -    | 0.0% | -    | -     | -      | - | 0.0% | -    | -    |        |
|                 | 19 | -      | -    | 0.0% | -     | -     | -          | -    | 0.0% | -    | -     | -      | - | 0.0% | -    | -    |        |
|                 | 20 | -      | -    | -    | -     | -     | -          | -    | -    | -    | -     | -      | - | -    | -    | -    |        |
|                 | 21 | -      | -    | -    | -     | -     | -          | -    | -    | -    | -     | -      | - | -    | -    | -    |        |
|                 | 22 | -      | -    | -    | -     | -     | -          | -    | -    | -    | -     | -      | - | -    | -    | -    |        |
|                 | 23 | -      | -    | -    | -     | -     | -          | -    | -    | -    | -     | -      | - | -    | -    | -    |        |
|                 | 24 | -      | -    | -    | -     | -     | -          | -    | -    | -    | -     | -      | - | -    | -    | -    |        |
|                 | 25 | -      | -    | -    | -     | -     | -          | -    | -    | -    | -     | -      | - | -    | -    | -    |        |
|                 | 26 | -      | -    | -    | -     | -     | -          | -    | -    | -    | -     | -      | - | -    | -    | -    |        |
|                 | 27 | -      | -    | -    | -     | -     | -          | -    | -    | -    | -     | -      | - | -    | -    | -    |        |
|                 | 28 | -      | -    | -    | -     | -     | -          | -    | -    | -    | -     | -      | - | -    | -    | -    |        |
|                 | 29 | -      | -    | -    | -     | -     | -          | -    | -    | -    | -     | -      | - | -    | -    | -    |        |
|                 | 30 | -      | -    | -    | -     | -     | -          | -    | -    | -    | -     | -      | - | -    | -    | -    |        |
| b)              |    | 1      | 2    | 3    | 4     | 5     | 1          | 2    | 3    | 4    | 5     | 1      | 2 | 3    | 4    | 5    |        |

| FT<br>[n. days] |    | <1000m |      |      |      |      | 1000-2000m |      |      |      |      | >2000m |      |      |      |      | P(R M) |
|-----------------|----|--------|------|------|------|------|------------|------|------|------|------|--------|------|------|------|------|--------|
|                 |    |        |      |      |      |      |            |      |      |      |      |        |      |      |      |      |        |
| Sa=0            | 0  | 0.1%   | 0.5% | 1.0% | 3.6% | 3.3% | 0.0%       | 0.3% | 0.6% | 2.6% | 2.7% | -      | 0.1% | 0.2% | 0.7% | 1.1% |        |
|                 | 1  | 0.0%   | 0.0% | 0.0% | 0.0% | 0.0% | 0.0%       | 0.0% | 0.0% | 0.0% | 0.0% | -      | 0.0% | 0.0% | 0.0% | 0.0% |        |
| Sa=7            | 0  | 0.1%   | 0.6% | 1.0% | 3.8% | 3.4% | 0.0%       | 0.3% | 0.6% | 2.7% | 2.8% | -      | 0.1% | 0.2% | 0.7% | 1.1% |        |
|                 | 1  | 0.0%   | 0.0% | 0.0% | 0.0% | 0.0% | 0.0%       | 0.0% | 0.0% | 0.0% | 0.0% | -      | 0.0% | 0.0% | 0.0% | 0.0% |        |
|                 | 2  | 0.1%   | 0.0% | 0.0% | 0.0% | 0.0% | 0.0%       | 0.0% | 0.0% | 0.0% | 0.0% | -      | 0.0% | 0.0% | 0.0% | 0.0% |        |
|                 | 3  | 0.0%   | 0.0% | 0.0% | 0.0% | 0.0% | 0.0%       | 0.0% | 0.0% | 0.0% | 0.0% | -      | 0.0% | 0.0% | 0.0% | 0.0% |        |
|                 | 4  | 0.1%   | 0.0% | 0.0% | 0.0% | 0.0% | 0.0%       | 0.0% | 0.0% | 0.0% | 0.0% | -      | 0.0% | 0.0% | 0.0% | 0.0% |        |
|                 | 5  | 0.0%   | 0.0% | 0.0% | 0.0% | 0.0% | 0.0%       | 0.0% | 0.0% | 0.0% | 0.0% | -      | 0.0% | 0.0% | 0.0% | 0.0% |        |
|                 | 6  | 0.1%   | 0.0% | 0.0% | 0.0% | 0.0% | 0.0%       | 0.0% | 0.0% | 0.0% | 0.0% | -      | 0.0% | 0.0% | 0.0% | 0.0% |        |
|                 | 7  | 0.0%   | 0.0% | 0.0% | 0.0% | 0.0% | 0.0%       | 0.0% | 0.0% | 0.0% | 0.0% | -      | 0.0% | 0.0% | 0.0% | 0.0% |        |
| Sa=30           | 0  | 0.1%   | 0.6% | 1.2% | 4.4% | 3.6% | 0.0%       | 0.3% | 0.7% | 3.1% | 3.0% | -      | 0.1% | 0.2% | 0.8% | 1.2% |        |
|                 | 1  | 0.0%   | 0.0% | 0.0% | 0.0% | 0.0% | 0.0%       | 0.0% | 0.0% | 0.0% | 0.0% | -      | 0.0% | 0.0% | 0.0% | 0.0% |        |
|                 | 2  | 0.0%   | 0.0% | 0.0% | 0.0% | 0.0% | 0.0%       | 0.0% | 0.0% | 0.0% | 0.0% | -      | 0.0% | 0.0% | 0.0% | 0.0% |        |
|                 | 3  | 0.0%   | 0.0% | 0.0% | 0.0% | 0.0% | 0.0%       | 0.0% | 0.0% | 0.0% | 0.0% | -      | 0.0% | 0.0% | 0.0% | 0.0% |        |
|                 | 4  | 0.0%   | 0.0% | 0.0% | 0.0% | 0.0% | 0.0%       | 0.0% | 0.0% | 0.0% | 0.0% | -      | 0.0% | 0.0% | 0.0% | 0.0% |        |
|                 | 5  | 1.5%   | 0.0% | 0.0% | 0.0% | 0.0% | 0.0%       | 0.0% | 0.0% | 0.0% | 0.0% | -      | 0.0% | 0.0% | 0.0% | 0.0% |        |
|                 | 6  | 0.0%   | 0.0% | 0.0% | 0.0% | 0.0% | 0.0%       | 0.0% | 0.0% | 0.0% | 0.0% | -      | 0.0% | 0.0% | 0.0% | 0.0% |        |
|                 | 7  | 0.0%   | 0.0% | 0.0% | 0.0% | 0.0% | 0.0%       | 0.0% | 0.0% | 0.0% | 0.0% | -      | 0.0% | 0.0% | 0.0% | 0.0% |        |
|                 | 8  | 0.0%   | 0.0% | 0.0% | 0.0% | 0.0% | 0.0%       | 0.0% | 0.0% | 0.0% | 0.0% | -      | 0.0% | 0.0% | 0.0% | 0.0% |        |
|                 | 9  | 0.0%   | 0.0% | 0.0% | 0.0% | 0.0% | 0.0%       | 0.0% | 0.0% | 0.0% | 0.0% | -      | 0.0% | 0.0% | 0.0% | 0.0% |        |
|                 | 10 | 0.0%   | 0.0% | 0.0% | 0.0% | 0.0% | 0.0%       | 0.0% | 0.0% | 0.0% | 0.0% | -      | 0.0% | 0.0% | 0.0% | 0.0% |        |
|                 | 11 | 0.0%   | 0.0% | 0.0% | 0.0% | 0.0% | 0.0%       | 0.0% | 0.0% | 0.0% | 0.0% | -      | 0.0% | 0.0% | 0.0% | 0.0% |        |
|                 | 12 | 0.0%   | 0.0% | 0.0% | 0.0% | 0.0% | 0.0%       | 0.0% | 0.0% | 0.0% | 0.0% | -      | 0.0% | 0.0% | 0.0% | 0.0% |        |
|                 | 13 | 0.0%   | 0.0% | 0.0% | 0.0% | 0.0% | 0.0%       | 0.0% | 0.0% | 0.0% | 0.0% | -      | 0.0% | 0.0% | 0.0% | 0.0% |        |
|                 | 14 | 0.0%   | 0.0% | 0.0% | 0.0% | 0.0% | 0.0%       | 0.0% | 0.0% | 0.0% | 0.0% | -      | 0.0% | 0.0% | 0.0% | 0.0% |        |
|                 | 15 | 0.0%   | -    | 0.0% | 0.0% | 0.0% | 0.0%       | -    | 0.0% | 0.0% | 0.0% | -      | -    | 0.0% | 0.0% | 0.0% |        |
|                 | 16 | -      | -    | 0.0% | -    | -    | -          | -    | 0.0% | -    | -    | -      | -    | 0.0% | -    | -    |        |
|                 | 17 | -      | -    | 0.0% | -    | -    | -          | -    | 0.0% | -    | -    | -      | -    | 0.0% | -    | -    |        |
|                 | 18 | -      | -    | 0.0% | -    | -    | -          | -    | 0.0% | -    | -    | -      | -    | 0.0% | -    | -    |        |
|                 | 19 | -      | -    | 0.0% | -    | -    | -          | -    | 0.0% | -    | -    | -      | -    | 0.0% | -    | -    |        |
|                 | 20 | -      | -    | -    | -    | -    | -          | -    | -    | -    | -    | -      | -    | -    | -    | -    |        |
|                 | 21 | -      | -    | -    | -    | -    | -          | -    | -    | -    | -    | -      | -    | -    | -    | -    |        |
|                 | 22 | -      | -    | -    | -    | -    | -          | -    | -    | -    | -    | -      | -    | -    | -    | -    |        |
|                 | 23 | -      | -    | -    | -    | -    | -          | -    | -    | -    | -    | -      | -    | -    | -    | -    |        |
|                 | 24 | -      | -    | -    | -    | -    | -          | -    | -    | -    | -    | -      | -    | -    | -    | -    |        |
|                 | 25 | -      | -    | -    | -    | -    | -          | -    | -    | -    | -    | -      | -    | -    | -    | -    |        |
|                 | 26 | -      | -    | -    | -    | -    | -          | -    | -    | -    | -    | -      | -    | -    | -    | -    |        |
|                 | 27 | -      | -    | -    | -    | -    | -          | -    | -    | -    | -    | -      | -    | -    | -    | -    |        |
|                 | 28 | -      | -    | -    | -    | -    | -          | -    | -    | -    | -    | -      | -    | -    | -    | -    |        |
|                 | 29 | -      | -    | -    | -    | -    | -          | -    | -    | -    | -    | -      | -    | -    | -    | -    |        |
|                 | 30 | -      | -    | -    | -    | -    | -          | -    | -    | -    | -    | -      | -    | -    | -    | -    |        |
| c)              |    | 1      | 2    | 3    | 4    | 5    | 1          | 2    | 3    | 4    | 5    | 1      | 2    | 3    | 4    | 5    |        |

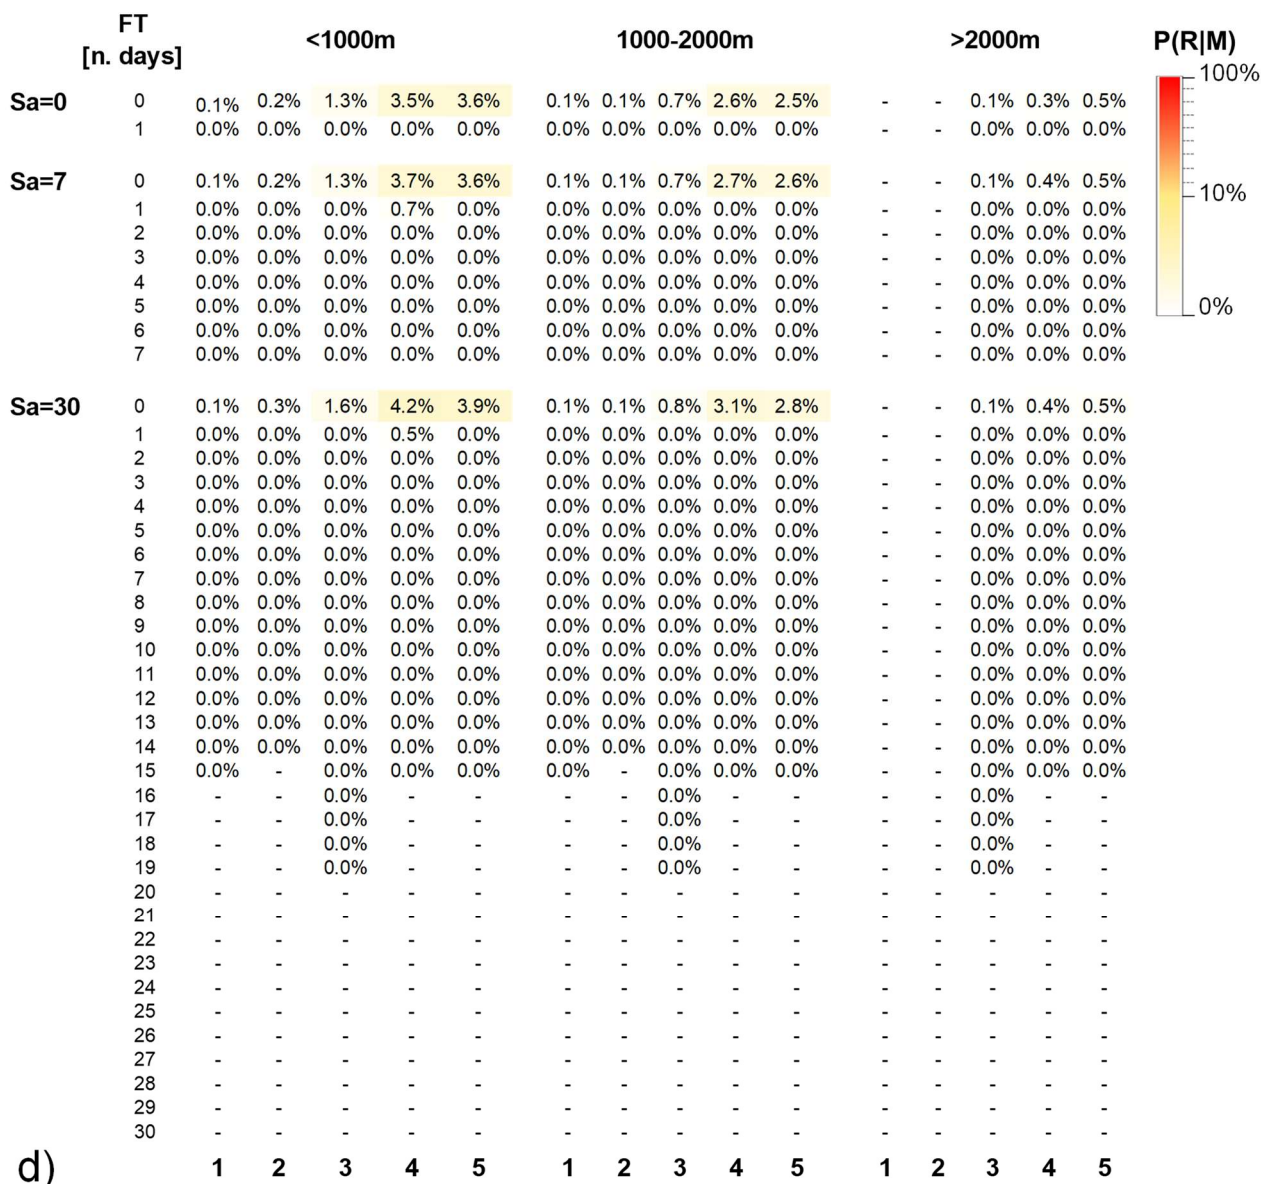

Fig. S27 Conditional probability,  $P(R|M)$ , calculated with Bayesian's method of freeze-thaw cycle maximum case with different aggregation scales  $S_a$  (0, 7, 30) and for different altitudes (<1000m, 1000m-2000m, >2000m) for 5 decades (1=1970-1979; 2=1980-1989; 3=1990-1999; 4=2000-2009; 5=2010-2019). (a) winter; (b) spring; (c) summer (d) autumn.



## S2.5.2 Medium calculated time-series

|       | FT<br>[n. days] | 1000m |      |      |       |       |   | 1000-2000m |      |      |      |   |   | >2000m |   |      |   |      | P(R M) |
|-------|-----------------|-------|------|------|-------|-------|---|------------|------|------|------|---|---|--------|---|------|---|------|--------|
|       |                 |       |      |      |       |       |   |            |      |      |      |   |   |        |   |      |   |      | 100%   |
| Sa=0  | 0               | 0.0%  | 0.1% | 0.0% | 0.3%  | 0.7%  | - | 0.0%       | 0.0% | 0.1% | 0.2% | - | - | 0.0%   | - | 0.0% | - | 0.0% |        |
|       | 1               | 0.0%  | 1.6% | 1.0% | 10.3% | 9.8%  | - | 0.2%       | 0.2% | 3.2% | 2.9% | - | - | 0.2%   | - | 0.4% | - | 0.4% |        |
| Sa=7  | 0               | 0.0%  | 0.0% | 0.0% | 0.0%  | 0.1%  | - | 0.0%       | 0.0% | 0.0% | 0.0% | - | - | 0.0%   | - | 0.0% | - | 0.0% |        |
|       | 1               | 0.0%  | 0.8% | 0.0% | 0.9%  | 0.9%  | - | 0.0%       | 0.0% | 0.0% | 0.0% | - | - | 0.0%   | - | 0.0% | - | 0.0% |        |
|       | 2               | 0.0%  | 0.9% | 0.0% | 0.7%  | 1.6%  | - | 0.0%       | 0.0% | 2.2% | 0.0% | - | - | 0.0%   | - | 0.0% | - | 0.0% |        |
|       | 3               | 0.0%  | 0.9% | 0.0% | 5.4%  | 7.1%  | - | 0.0%       | 0.0% | 1.4% | 4.0% | - | - | 0.0%   | - | 0.0% | - | 0.0% |        |
|       | 4               | 0.0%  | 1.7% | 0.7% | 11.6% | 8.0%  | - | 0.9%       | 0.7% | 1.4% | 1.8% | - | - | 0.7%   | - | 0.0% | - | 0.0% |        |
|       | 5               | 0.0%  | 1.5% | 2.6% | 6.7%  | 12.3% | - | 0.0%       | 0.0% | 2.5% | 4.9% | - | - | 0.0%   | - | 0.0% | - | 0.0% |        |
|       | 6               | 0.0%  | 1.4% | 0.0% | 11.1% | 10.0% | - | 0.7%       | 0.0% | 1.3% | 3.8% | - | - | 0.0%   | - | 0.0% | - | 0.0% |        |
|       | 7               | 0.0%  | 1.2% | 1.9% | 13.2% | 13.4% | - | 0.0%       | 0.0% | 5.0% | 2.6% | - | - | 0.0%   | - | 1.0% | - | 1.0% |        |
| Sa=30 | 0               | 0.0%  | 0.0% | 0.0% | 0.0%  | 0.0%  | - | 0.0%       | 0.0% | 0.0% | 0.0% | - | - | 0.0%   | - | 0.0% | - | 0.0% |        |
|       | 1               | 0.0%  | 0.0% | 0.0% | 0.0%  | 0.0%  | - | 0.0%       | 0.0% | 0.0% | 0.0% | - | - | 0.0%   | - | 0.0% | - | 0.0% |        |
|       | 2               | 0.0%  | 0.0% | 0.0% | 0.0%  | 1.7%  | - | 0.0%       | 0.0% | 0.0% | 0.6% | - | - | 0.0%   | - | 0.0% | - | 0.0% |        |
|       | 3               | 0.0%  | 0.0% | 0.0% | 0.0%  | 0.0%  | - | 0.0%       | 0.0% | 0.0% | 0.0% | - | - | 0.0%   | - | 0.0% | - | 0.0% |        |
|       | 4               | 0.0%  | 0.0% | 0.0% | 0.0%  | 0.0%  | - | 0.0%       | 0.0% | 0.0% | 0.0% | - | - | 0.0%   | - | 0.0% | - | 0.0% |        |
|       | 5               | 0.0%  | 0.0% | 0.0% | 0.0%  | 0.0%  | - | 0.0%       | 0.0% | 0.0% | 0.0% | - | - | 0.0%   | - | 0.0% | - | 0.0% |        |
|       | 6               | 0.0%  | 0.0% | 0.0% | 2.6%  | 0.0%  | - | 0.0%       | 0.0% | 0.0% | 0.0% | - | - | 0.0%   | - | 0.0% | - | 0.0% |        |
|       | 7               | 0.0%  | 0.0% | 0.0% | 0.0%  | 3.0%  | - | 0.0%       | 0.0% | 1.4% | 0.0% | - | - | 0.0%   | - | 0.0% | - | 0.0% |        |
|       | 8               | 0.0%  | 0.0% | 0.0% | 2.9%  | 2.3%  | - | 0.0%       | 0.0% | 5.7% | 0.0% | - | - | 0.0%   | - | 0.0% | - | 0.0% |        |
|       | 9               | 0.0%  | 2.0% | 0.0% | 1.0%  | 0.0%  | - | 0.0%       | 0.0% | 3.1% | 0.0% | - | - | 0.0%   | - | 0.0% | - | 0.0% |        |
|       | 10              | 0.0%  | 2.4% | 0.0% | 10.5% | 5.4%  | - | 0.0%       | 0.0% | 2.6% | 2.7% | - | - | 0.0%   | - | 0.0% | - | 0.0% |        |
|       | 11              | 0.0%  | 0.0% | 0.0% | 3.0%  | 0.0%  | - | 0.0%       | 0.0% | 0.0% | 0.0% | - | - | 0.0%   | - | 0.0% | - | 0.0% |        |
|       | 12              | 0.0%  | 0.0% | 0.0% | 1.8%  | 3.0%  | - | 0.0%       | 0.0% | 0.0% | 0.0% | - | - | 0.0%   | - | 0.0% | - | 0.0% |        |
|       | 13              | 0.0%  | 0.0% | 0.0% | 4.5%  | 9.1%  | - | 0.0%       | 0.0% | 0.0% | 6.1% | - | - | 0.0%   | - | 0.0% | - | 0.0% |        |
|       | 14              | 0.0%  | 0.0% | 0.0% | 0.0%  | 10.5% | - | 0.0%       | 0.0% | 0.0% | 0.0% | - | - | 0.0%   | - | 0.0% | - | 0.0% |        |
|       | 15              | 0.0%  | 0.0% | 0.0% | 3.7%  | 2.9%  | - | 0.0%       | 0.0% | 0.0% | 2.9% | - | - | 0.0%   | - | 0.0% | - | 0.0% |        |
|       | 16              | 0.0%  | 2.9% | 2.4% | 7.9%  | 8.3%  | - | 2.9%       | 0.0% | 2.6% | 2.8% | - | - | 0.0%   | - | 0.0% | - | 0.0% |        |
|       | 17              | 0.0%  | 3.9% | 0.0% | 7.1%  | 12.5% | - | 0.0%       | 0.0% | 0.0% | 5.0% | - | - | 0.0%   | - | 0.0% | - | 0.0% |        |
|       | 18              | 0.0%  | 0.0% | 0.0% | 3.1%  | 6.0%  | - | 0.0%       | 0.0% | 3.1% | 0.0% | - | - | 0.0%   | - | 0.0% | - | 0.0% |        |
|       | 19              | 0.0%  | 0.0% | 2.0% | 3.4%  | 4.4%  | - | 0.0%       | 0.0% | 3.4% | 1.5% | - | - | 0.0%   | - | 0.0% | - | 0.0% |        |
|       | 20              | 0.0%  | 0.0% | 2.8% | 6.1%  | 9.2%  | - | 2.4%       | 0.0% | 6.1% | 6.2% | - | - | 0.0%   | - | 0.0% | - | 0.0% |        |
|       | 21              | 0.0%  | 1.9% | 2.0% | 5.1%  | 18.5% | - | 0.0%       | 0.0% | 2.6% | 9.3% | - | - | 0.0%   | - | 0.0% | - | 0.0% |        |
|       | 22              | 0.0%  | 0.0% | 4.0% | 2.2%  | 15.4% | - | 0.0%       | 0.0% | 6.7% | 3.8% | - | - | 0.0%   | - | 0.0% | - | 0.0% |        |
|       | 23              | 0.0%  | 5.1% | 4.6% | 14.8% | 19.5% | - | 0.0%       | 1.5% | 2.5% | 1.2% | - | - | 0.0%   | - | 0.0% | - | 0.0% |        |
|       | 24              | 0.0%  | 2.2% | 0.0% | 20.9% | 13.3% | - | 2.2%       | 0.0% | 7.5% | 4.8% | - | - | 0.0%   | - | 0.0% | - | 0.0% |        |
|       | 25              | 0.0%  | 1.7% | 1.7% | 19.0% | 12.9% | - | 0.0%       | 0.0% | 3.6% | 4.7% | - | - | 0.0%   | - | 0.0% | - | 0.0% |        |
|       | 26              | 0.0%  | 0.8% | 5.2% | 17.5% | 15.7% | - | 0.0%       | 0.0% | 6.7% | 5.9% | - | - | 0.0%   | - | 1.0% | - | 1.0% |        |
|       | 27              | 0.0%  | 2.8% | 0.9% | 22.2% | 8.5%  | - | 0.0%       | 0.9% | 4.2% | 0.0% | - | - | 0.9%   | - | 0.8% | - | 0.8% |        |
|       | 28              | 1.4%  | 1.0% | 2.0% | 14.8% | 14.3% | - | 0.0%       | 0.0% | 5.6% | 3.6% | - | - | 0.0%   | - | 1.2% | - | 1.2% |        |
|       | 29              | 0.0%  | 0.9% | 0.0% | 9.6%  | 21.4% | - | 0.0%       | 0.0% | 0.0% | 0.0% | - | - | 0.0%   | - | 0.0% | - | 0.0% |        |
|       | 30              | 0.0%  | 0.8% | 3.8% | 11.2% | 9.6%  | - | 0.4%       | 0.8% | 1.7% | 1.0% | - | - | 0.0%   | - | 1.0% | - | 1.0% |        |
| a)    |                 | 1     | 2    | 3    | 4     | 5     |   | 1          | 2    | 3    | 4    | 5 |   | 1      | 2 | 3    | 4 | 5    |        |



| FT<br>[n. days] |    | 1000m |      |       |       |       | 1000-2000m |      |      |       |       | >2000m |   |      |      |      | P(R M)<br> |
|-----------------|----|-------|------|-------|-------|-------|------------|------|------|-------|-------|--------|---|------|------|------|------------|
| Sa=0            | 0  | 0.1%  | 0.5% | 1.2%  | 3.8%  | 4.5%  | 0.0%       | 0.2% | 0.6% | 2.7%  | 4.3%  | -      | - | 0.0% | 0.2% | 0.5% |            |
|                 | 1  | 0.2%  | 0.5% | 1.2%  | 6.9%  | 6.7%  | 0.2%       | 0.5% | 1.0% | 3.8%  | 2.5%  | -      | - | 0.0% | 0.0% | 0.0% |            |
| Sa=7            | 0  | 0.0%  | 0.4% | 0.8%  | 2.6%  | 3.8%  | 0.0%       | 0.2% | 0.5% | 2.0%  | 3.5%  | -      | - | 0.1% | 0.3% | 0.4% |            |
|                 | 1  | 0.0%  | 0.8% | 1.9%  | 12.1% | 14.7% | 0.0%       | 1.5% | 0.6% | 8.6%  | 11.0% | -      | - | 0.0% | 0.0% | 0.9% |            |
|                 | 2  | 2.0%  | 2.7% | 1.2%  | 11.9% | 8.1%  | 0.0%       | 0.9% | 0.0% | 8.2%  | 6.5%  | -      | - | 0.0% | 0.0% | 0.0% |            |
|                 | 3  | 0.0%  | 0.0% | 2.7%  | 8.1%  | 6.3%  | 1.0%       | 0.9% | 2.7% | 3.4%  | 5.6%  | -      | - | 0.0% | 0.0% | 0.8% |            |
|                 | 4  | 0.0%  | 0.0% | 3.7%  | 11.6% | 9.7%  | 0.0%       | 0.0% | 1.5% | 4.3%  | 8.0%  | -      | - | 0.0% | 0.0% | 0.9% |            |
|                 | 5  | 0.0%  | 0.7% | 2.0%  | 7.6%  | 4.9%  | 0.0%       | 0.0% | 0.0% | 6.7%  | 2.5%  | -      | - | 0.0% | 0.0% | 0.6% |            |
|                 | 6  | 0.7%  | 0.0% | 1.8%  | 2.6%  | 3.1%  | 0.0%       | 0.0% | 0.6% | 2.6%  | 2.5%  | -      | - | 0.0% | 0.0% | 0.0% |            |
|                 | 7  | 0.0%  | 0.3% | 0.7%  | 2.4%  | 4.5%  | 0.6%       | 0.0% | 0.7% | 0.8%  | 0.7%  | -      | - | 0.0% | 0.0% | 0.0% |            |
| Sa=30           | 0  | 0.0%  | 0.1% | 0.1%  | 0.8%  | 1.4%  | 0.0%       | 0.0% | 0.1% | 0.9%  | 1.4%  | -      | - | 0.1% | 0.2% | 0.1% |            |
|                 | 1  | 0.0%  | 0.0% | 2.7%  | 2.4%  | 14.1% | 0.0%       | 0.8% | 0.0% | 3.6%  | 9.4%  | -      | - | 0.0% | 0.0% | 0.0% |            |
|                 | 2  | 0.0%  | 3.7% | 0.0%  | 7.3%  | 8.4%  | 0.0%       | 1.9% | 0.0% | 12.2% | 9.0%  | -      | - | 0.0% | 0.0% | 1.1% |            |
|                 | 3  | 0.0%  | 1.5% | 0.0%  | 7.8%  | 11.4% | 0.0%       | 0.0% | 0.0% | 4.7%  | 5.7%  | -      | - | 0.0% | 0.0% | 2.9% |            |
|                 | 4  | 0.0%  | 2.7% | 0.0%  | 10.2% | 9.9%  | 0.0%       | 2.7% | 4.8% | 6.1%  | 6.2%  | -      | - | 0.0% | 0.0% | 1.2% |            |
|                 | 5  | 0.0%  | 0.0% | 6.1%  | 9.5%  | 9.4%  | 0.0%       | 0.0% | 2.4% | 2.4%  | 7.1%  | -      | - | 0.0% | 0.0% | 0.0% |            |
|                 | 6  | 1.5%  | 3.1% | 2.4%  | 7.7%  | 11.4% | 1.5%       | 0.0% | 0.0% | 10.3% | 10.2% | -      | - | 0.0% | 0.0% | 0.0% |            |
|                 | 7  | 0.0%  | 1.7% | 6.3%  | 17.6% | 0.0%  | 0.0%       | 0.0% | 0.0% | 0.0%  | 3.0%  | -      | - | 0.0% | 1.4% | 0.0% |            |
|                 | 8  | 0.0%  | 0.0% | 0.0%  | 5.7%  | 7.0%  | 0.0%       | 0.0% | 0.0% | 2.9%  | 7.0%  | -      | - | 0.0% | 0.0% | 0.0% |            |
|                 | 9  | 0.0%  | 0.0% | 3.9%  | 6.2%  | 7.1%  | 0.0%       | 0.0% | 2.6% | 7.2%  | 7.1%  | -      | - | 0.0% | 0.0% | 0.0% |            |
|                 | 10 | 0.0%  | 0.0% | 4.3%  | 7.9%  | 0.0%  | 0.0%       | 0.0% | 0.0% | 2.6%  | 5.4%  | -      | - | 0.0% | 0.0% | 0.0% |            |
|                 | 11 | 0.0%  | 0.0% | 4.7%  | 12.1% | 0.0%  | 0.0%       | 0.0% | 2.3% | 0.0%  | 2.7%  | -      | - | 0.0% | 0.0% | 2.7% |            |
|                 | 12 | 0.0%  | 0.0% | 11.1% | 1.8%  | 12.1% | 0.0%       | 0.0% | 0.0% | 3.5%  | 9.1%  | -      | - | 0.0% | 0.0% | 3.0% |            |
|                 | 13 | 0.0%  | 0.0% | 0.0%  | 2.3%  | 9.1%  | 0.0%       | 0.0% | 0.0% | 2.3%  | 6.1%  | -      | - | 0.0% | 0.0% | 0.0% |            |
|                 | 14 | 0.0%  | 0.0% | 0.0%  | 20.4% | 10.5% | 0.0%       | 0.0% | 0.0% | 8.2%  | 10.5% | -      | - | 0.0% | 0.0% | 0.0% |            |
|                 | 15 | 0.0%  | 0.0% | 2.1%  | 9.3%  | 14.7% | 0.0%       | 2.3% | 2.1% | 3.7%  | 2.9%  | -      | - | 0.0% | 0.0% | 0.0% |            |
|                 | 16 | 0.0%  | 0.0% | 0.0%  | 10.5% | 8.3%  | 0.0%       | 0.0% | 2.4% | 10.5% | 8.3%  | -      | - | 0.0% | 0.0% | 0.0% |            |
|                 | 17 | 0.0%  | 2.0% | 0.0%  | 7.1%  | 5.0%  | 0.0%       | 2.0% | 1.8% | 3.6%  | 7.5%  | -      | - | 0.0% | 0.0% | 2.5% |            |
|                 | 18 | 0.0%  | 0.0% | 2.0%  | 3.1%  | 8.0%  | 0.0%       | 2.3% | 2.0% | 6.3%  | 8.0%  | -      | - | 0.0% | 0.0% | 0.0% |            |
|                 | 19 | 0.0%  | 0.0% | 2.0%  | 13.8% | 17.6% | 0.0%       | 0.0% | 0.0% | 10.3% | 13.2% | -      | - | 0.0% | 0.0% | 0.0% |            |
|                 | 20 | 0.0%  | 0.0% | 1.4%  | 12.1% | 4.6%  | 0.0%       | 0.0% | 1.4% | 9.1%  | 1.5%  | -      | - | 0.0% | 0.0% | 0.0% |            |
|                 | 21 | 0.0%  | 3.7% | 2.0%  | 12.8% | 7.4%  | 0.0%       | 0.0% | 0.0% | 5.1%  | 3.7%  | -      | - | 0.0% | 0.0% | 0.0% |            |
|                 | 22 | 1.2%  | 0.0% | 6.0%  | 8.9%  | 11.5% | 0.0%       | 1.9% | 4.0% | 8.9%  | 1.9%  | -      | - | 0.0% | 0.0% | 0.0% |            |
|                 | 23 | 0.0%  | 0.0% | 0.0%  | 1.2%  | 6.1%  | 0.0%       | 0.0% | 1.5% | 0.0%  | 3.7%  | -      | - | 0.0% | 0.0% | 1.2% |            |
|                 | 24 | 0.0%  | 0.0% | 2.5%  | 9.0%  | 4.8%  | 1.2%       | 0.0% | 0.0% | 4.5%  | 4.8%  | -      | - | 0.0% | 0.0% | 1.2% |            |
|                 | 25 | 1.3%  | 1.7% | 1.7%  | 3.6%  | 4.7%  | 1.3%       | 0.0% | 1.7% | 6.0%  | 2.4%  | -      | - | 0.0% | 0.0% | 0.0% |            |
|                 | 26 | 0.0%  | 0.8% | 0.0%  | 5.0%  | 6.9%  | 0.0%       | 0.0% | 0.0% | 1.7%  | 0.0%  | -      | - | 0.0% | 0.0% | 0.0% |            |
|                 | 27 | 0.0%  | 0.0% | 1.8%  | 2.1%  | 2.5%  | 0.0%       | 0.0% | 0.9% | 0.7%  | 0.0%  | -      | - | 0.0% | 0.0% | 0.0% |            |
|                 | 28 | 0.0%  | 1.0% | 0.0%  | 2.8%  | 4.8%  | 0.0%       | 0.0% | 0.0% | 2.8%  | 0.0%  | -      | - | 0.0% | 0.0% | 0.0% |            |
|                 | 29 | 0.8%  | 0.0% | 0.0%  | 4.1%  | 2.4%  | 0.0%       | 0.0% | 0.0% | 1.4%  | 0.0%  | -      | - | 0.0% | 0.0% | 0.0% |            |
|                 | 30 | 0.0%  | 0.4% | 0.0%  | 2.6%  | 1.9%  | 0.0%       | 0.4% | 0.0% | 0.9%  | 1.0%  | -      | - | 0.0% | 0.0% | 0.0% |            |
| b)              |    | 1     | 2    | 3     | 4     | 5     | 1          | 2    | 3    | 4     | 5     | 1      | 2 | 3    | 4    | 5    |            |

|       | FT<br>[n. days] | 1000m |      |      |      |      | 1000-2000m |      |      |      |      | >2000m |      |      |      |      | P(R M) |
|-------|-----------------|-------|------|------|------|------|------------|------|------|------|------|--------|------|------|------|------|--------|
|       |                 |       |      |      |      |      |            |      |      |      |      |        |      |      |      |      |        |
| Sa=0  | 0               | 0.0%  | 0.9% | 1.6% | 5.3% | 4.9% | 0.0%       | 0.4% | 0.9% | 3.8% | 4.1% | -      | 0.1% | 0.3% | 1.0% | 1.7% |        |
|       | 1               | 0.2%  | 0.0% | 0.0% | 0.0% | 0.0% | 0.0%       | 0.0% | 0.0% | 0.0% | 0.0% | -      | 0.0% | 0.0% | 0.0% | 0.0% |        |
| Sa=7  | 0               | 0.0%  | 1.0% | 1.9% | 6.2% | 5.6% | 0.1%       | 0.5% | 1.1% | 4.4% | 4.7% | -      | 0.1% | 0.3% | 1.2% | 1.9% |        |
|       | 1               | 0.0%  | 0.0% | 0.0% | 0.0% | 0.0% | 0.0%       | 0.0% | 0.0% | 0.0% | 0.0% | -      | 0.0% | 0.0% | 0.0% | 0.0% |        |
|       | 2               | 1.0%  | 0.0% | 0.0% | 0.0% | 0.0% | 0.0%       | 0.0% | 0.0% | 0.0% | 0.0% | -      | 0.9% | 0.0% | 0.0% | 0.0% |        |
|       | 3               | 0.0%  | 0.0% | 0.0% | 0.0% | 0.0% | 0.0%       | 0.0% | 0.0% | 0.0% | 0.0% | -      | 0.0% | 0.0% | 0.0% | 0.0% |        |
|       | 4               | 0.0%  | 0.0% | 0.0% | 0.0% | 0.0% | 0.0%       | 0.0% | 0.0% | 0.0% | 0.0% | -      | 0.0% | 0.0% | 0.0% | 0.0% |        |
|       | 5               | 0.7%  | 0.0% | 0.0% | 0.0% | 0.0% | 0.0%       | 0.0% | 0.0% | 0.0% | 0.0% | -      | 0.0% | 0.0% | 0.0% | 0.0% |        |
|       | 6               | 0.0%  | 0.0% | 0.0% | 0.0% | 0.0% | 0.0%       | 0.0% | 0.0% | 0.0% | 0.0% | -      | 0.0% | 0.0% | 0.0% | 0.0% |        |
|       | 7               | 0.3%  | 0.0% | 0.0% | 0.0% | 0.0% | 0.0%       | 0.0% | 0.0% | 0.0% | 0.0% | -      | 0.0% | 0.0% | 0.0% | 0.0% |        |
| Sa=30 | 0               | 0.0%  | 1.2% | 2.3% | 7.3% | 7.0% | 0.1%       | 0.6% | 1.3% | 5.2% | 5.9% | -      | 0.1% | 0.4% | 1.4% | 2.4% |        |
|       | 1               | 0.0%  | 0.0% | 0.0% | 0.0% | 0.0% | 0.0%       | 0.0% | 0.9% | 0.0% | 0.0% | -      | 0.0% | 0.0% | 0.0% | 0.0% |        |
|       | 2               | 0.0%  | 0.0% | 0.0% | 0.0% | 0.6% | 0.0%       | 0.0% | 0.0% | 0.0% | 0.0% | -      | 0.0% | 0.0% | 0.0% | 0.0% |        |
|       | 3               | 0.0%  | 0.0% | 0.0% | 0.0% | 0.0% | 0.0%       | 0.0% | 0.0% | 0.0% | 0.0% | -      | 0.0% | 0.0% | 0.0% | 0.0% |        |
|       | 4               | 0.0%  | 0.0% | 0.0% | 0.0% | 0.0% | 0.0%       | 0.0% | 0.0% | 0.0% | 0.0% | -      | 0.0% | 0.0% | 0.0% | 0.0% |        |
|       | 5               | 0.0%  | 0.0% | 0.0% | 0.0% | 0.0% | 0.0%       | 0.0% | 0.0% | 0.0% | 0.0% | -      | 0.0% | 0.0% | 0.0% | 0.0% |        |
|       | 6               | 1.5%  | 0.0% | 0.0% | 0.0% | 0.0% | 0.0%       | 0.0% | 0.0% | 0.0% | 0.0% | -      | 0.0% | 0.0% | 0.0% | 0.0% |        |
|       | 7               | 0.0%  | 0.0% | 0.0% | 0.0% | 0.0% | 0.0%       | 0.0% | 0.0% | 0.0% | 0.0% | -      | 0.0% | 0.0% | 0.0% | 0.0% |        |
|       | 8               | 0.0%  | 0.0% | 0.0% | 0.0% | 0.0% | 0.0%       | 0.0% | 0.0% | 0.0% | 0.0% | -      | 0.0% | 0.0% | 0.0% | 0.0% |        |
|       | 9               | 0.0%  | 0.0% | 0.0% | 0.0% | 0.0% | 0.0%       | 0.0% | 0.0% | 0.0% | 0.0% | -      | 0.0% | 0.0% | 0.0% | 0.0% |        |
|       | 10              | 0.0%  | 0.0% | 0.0% | 0.0% | 0.0% | 0.0%       | 0.0% | 0.0% | 0.0% | 0.0% | -      | 0.0% | 0.0% | 0.0% | 0.0% |        |
|       | 11              | 0.0%  | 0.0% | 0.0% | 0.0% | 0.0% | 0.0%       | 0.0% | 0.0% | 0.0% | 0.0% | -      | 0.0% | 0.0% | 0.0% | 0.0% |        |
|       | 12              | 0.0%  | 0.0% | 0.0% | 0.0% | 0.0% | 0.0%       | 0.0% | 0.0% | 0.0% | 0.0% | -      | 0.0% | 0.0% | 0.0% | 0.0% |        |
|       | 13              | 0.0%  | 0.0% | 0.0% | 0.0% | 0.0% | 0.0%       | 0.0% | 0.0% | 0.0% | 0.0% | -      | 0.0% | 0.0% | 0.0% | 0.0% |        |
|       | 14              | 0.0%  | 0.0% | 0.0% | 0.0% | 0.0% | 0.0%       | 0.0% | 0.0% | 0.0% | 0.0% | -      | 0.0% | 0.0% | 0.0% | 0.0% |        |
|       | 15              | 0.0%  | 0.0% | 0.0% | 0.0% | 0.0% | 0.0%       | 0.0% | 0.0% | 0.0% | 0.0% | -      | 0.0% | 0.0% | 0.0% | 0.0% |        |
|       | 16              | 0.0%  | 0.0% | 0.0% | 0.0% | 0.0% | 0.0%       | 0.0% | 0.0% | 0.0% | 0.0% | -      | 0.0% | 0.0% | 0.0% | 0.0% |        |
|       | 17              | 0.0%  | 0.0% | 0.0% | 0.0% | 0.0% | 0.0%       | 0.0% | 0.0% | 0.0% | 0.0% | -      | 0.0% | 0.0% | 0.0% | 0.0% |        |
|       | 18              | 0.0%  | 0.0% | 0.0% | 0.0% | 0.0% | 0.0%       | 0.0% | 0.0% | 0.0% | 0.0% | -      | 2.3% | 0.0% | 0.0% | 0.0% |        |
|       | 19              | 0.0%  | 0.0% | 0.0% | 0.0% | 0.0% | 0.0%       | 0.0% | 0.0% | 0.0% | 0.0% | -      | 0.0% | 0.0% | 0.0% | 0.0% |        |
|       | 20              | 2.6%  | 0.0% | 0.0% | 0.0% | 0.0% | 0.0%       | 0.0% | 0.0% | 0.0% | 0.0% | -      | 0.0% | 0.0% | 0.0% | 0.0% |        |
|       | 21              | 0.0%  | 0.0% | 0.0% | 0.0% | 0.0% | 0.0%       | 0.0% | 0.0% | 0.0% | 0.0% | -      | 0.0% | 0.0% | 0.0% | 0.0% |        |
|       | 22              | 1.2%  | 0.0% | 0.0% | 0.0% | 0.0% | 0.0%       | 0.0% | 0.0% | 0.0% | 0.0% | -      | 0.0% | 0.0% | 0.0% | 0.0% |        |
|       | 23              | 0.0%  | 0.0% | 0.0% | 0.0% | 0.0% | 0.0%       | 0.0% | 0.0% | 0.0% | 0.0% | -      | 0.0% | 0.0% | 0.0% | 0.0% |        |
|       | 24              | 0.0%  | 0.0% | 0.0% | 0.0% | 0.0% | 0.0%       | 0.0% | 0.0% | 0.0% | 0.0% | -      | 0.0% | 0.0% | 0.0% | 0.0% |        |
|       | 25              | 0.0%  | 0.0% | 0.0% | 0.0% | 0.0% | 0.0%       | 0.0% | 0.0% | 0.0% | 0.0% | -      | 0.0% | 0.0% | 0.0% | 0.0% |        |
|       | 26              | 0.0%  | 0.0% | 0.0% | 0.0% | 0.0% | 0.0%       | 0.0% | 0.0% | 0.0% | 0.0% | -      | 0.0% | 0.0% | 0.0% | 0.0% |        |
|       | 27              | 0.0%  | 0.0% | 0.0% | 0.0% | 0.0% | 0.0%       | 0.0% | 0.0% | 0.0% | 0.0% | -      | 0.0% | 0.0% | 0.0% | 0.0% |        |
|       | 28              | 0.0%  | 0.0% | 0.0% | 0.0% | 0.0% | 0.0%       | 0.0% | 0.0% | 0.0% | 0.0% | -      | 0.0% | 0.0% | 0.0% | 0.0% |        |
|       | 29              | 0.0%  | 0.0% | 0.0% | 0.0% | 0.0% | 0.0%       | 0.0% | 0.0% | 0.0% | 0.0% | -      | 0.0% | 0.0% | 0.0% | 0.0% |        |
|       | 30              | 0.0%  | 0.0% | 0.0% | 0.0% | 0.0% | 0.0%       | 0.0% | 0.0% | 0.0% | 0.0% | -      | 0.0% | 0.0% | 0.0% | 0.0% |        |
| c)    |                 | 1     | 2    | 3    | 4    | 5    | 1          | 2    | 3    | 4    | 5    | 1      | 2    | 3    | 4    | 5    |        |



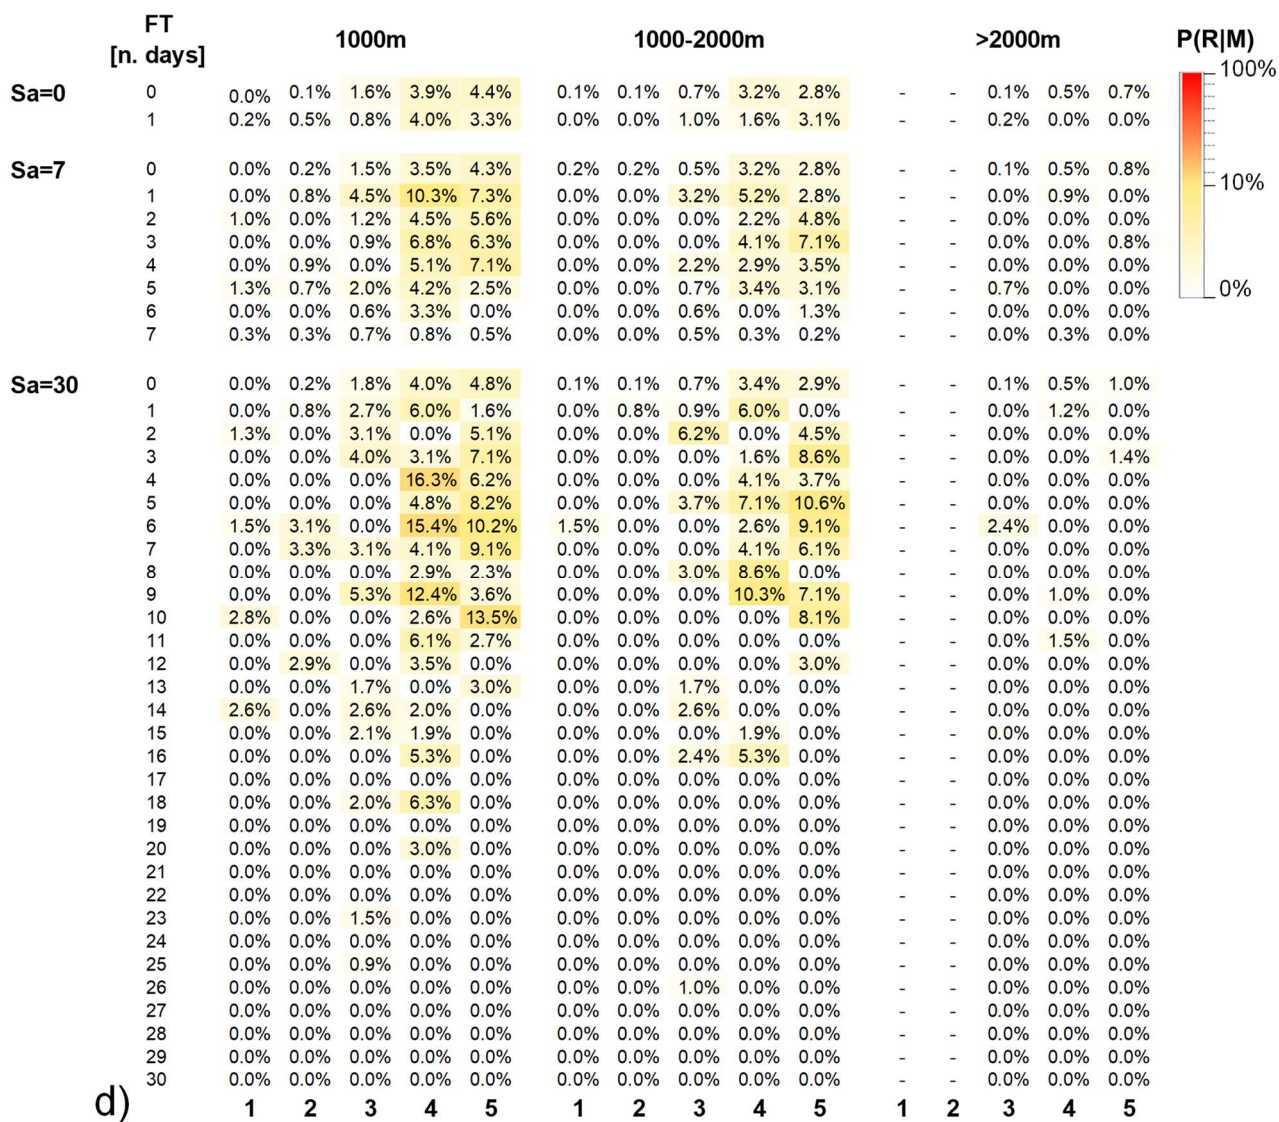

Fig. S28 Conditional probability,  $P(R|M)$ , calculated with Bayesian's method of freeze-thaw cycle medium case with different aggregation scales  $S_a$  (0, 7, 30) and for different altitudes (<1000m, 1000m-2000m, >2000m) for 5 decades (1=1970-1979; 2=1980-1989; 3=1990-1999; 4=2000-2009; 5=2010-2019). (a) winter; (b) spring; (c) summer (d) autumn.

### S2.5.3 Minimum calculated time-series

|       | FT<br>[n. days] | 1000m |      |      |       |       | 1000-2000m |      |      |      |      | >2000m |   |      |   |      | P(R M) |
|-------|-----------------|-------|------|------|-------|-------|------------|------|------|------|------|--------|---|------|---|------|--------|
| Sa=0  | 0               | 0.0%  | 0.9% | 1.3% | 6.9%  | 6.5%  | -          | 0.2% | 0.2% | 1.7% | 1.4% | -      | - | 0.0% | - | 0.1% |        |
|       | 1               | 0.0%  | 0.3% | 0.5% | 1.4%  | 1.5%  | -          | 0.0% | 0.0% | 1.3% | 0.8% | -      | - | 0.0% | - | 0.1% |        |
| Sa=7  | 0               | 0.1%  | 1.0% | 1.7% | 8.9%  | 8.7%  | -          | 0.3% | 0.2% | 2.0% | 1.5% | -      | - | 0.0% | - | 0.1% |        |
|       | 1               | 0.0%  | 1.0% | 1.0% | 4.4%  | 1.4%  | -          | 0.0% | 0.3% | 2.7% | 0.6% | -      | - | 0.0% | - | 0.0% |        |
|       | 2               | 0.0%  | 0.5% | 0.3% | 3.4%  | 2.0%  | -          | 0.0% | 0.0% | 1.3% | 2.0% | -      | - | 0.0% | - | 0.3% |        |
|       | 3               | 0.0%  | 0.0% | 0.9% | 1.6%  | 3.2%  | -          | 0.0% | 0.0% | 0.6% | 1.6% | -      | - | 0.0% | - | 0.0% |        |
|       | 4               | 0.0%  | 0.5% | 0.7% | 0.0%  | 0.4%  | -          | 0.0% | 0.0% | 0.4% | 0.4% | -      | - | 0.0% | - | 0.4% |        |
|       | 5               | 0.0%  | 0.0% | 0.0% | 0.5%  | 2.0%  | -          | 0.0% | 0.0% | 1.0% | 1.2% | -      | - | 0.0% | - | 0.0% |        |
|       | 6               | 0.0%  | 0.0% | 0.0% | 0.0%  | 0.5%  | -          | 0.0% | 0.0% | 0.0% | 0.5% | -      | - | 0.0% | - | 0.0% |        |
|       | 7               | 0.0%  | 0.0% | 0.0% | 0.0%  | 0.6%  | -          | 0.0% | 0.3% | 0.0% | 0.3% | -      | - | 0.3% | - | 0.0% |        |
| Sa=30 | 0               | 0.1%  | 1.9% | 2.7% | 13.4% | 14.5% | -          | 0.5% | 0.3% | 2.0% | 2.6% | -      | - | 0.0% | - | 0.0% |        |
|       | 1               | 0.0%  | 0.0% | 3.0% | 9.1%  | 1.3%  | -          | 0.0% | 0.6% | 2.4% | 0.3% | -      | - | 0.0% | - | 0.0% |        |
|       | 2               | 0.0%  | 1.4% | 2.5% | 10.0% | 7.5%  | -          | 0.0% | 0.0% | 2.9% | 1.5% | -      | - | 0.0% | - | 0.0% |        |
|       | 3               | 0.0%  | 0.0% | 2.1% | 8.8%  | 5.4%  | -          | 0.0% | 0.0% | 2.1% | 1.4% | -      | - | 0.0% | - | 0.0% |        |
|       | 4               | 0.0%  | 0.0% | 2.6% | 2.7%  | 4.7%  | -          | 0.0% | 0.0% | 1.1% | 0.7% | -      | - | 0.0% | - | 0.7% |        |
|       | 5               | 0.0%  | 0.7% | 1.1% | 1.6%  | 10.2% | -          | 0.0% | 0.0% | 0.8% | 4.0% | -      | - | 0.0% | - | 0.6% |        |
|       | 6               | 0.0%  | 0.0% | 0.0% | 4.7%  | 2.1%  | -          | 0.0% | 0.0% | 4.1% | 1.4% | -      | - | 0.0% | - | 0.7% |        |
|       | 7               | 0.0%  | 0.7% | 0.0% | 0.9%  | 3.7%  | -          | 0.0% | 0.9% | 0.0% | 2.2% | -      | - | 0.9% | - | 0.0% |        |
|       | 8               | 0.0%  | 0.0% | 0.0% | 1.7%  | 5.8%  | -          | 0.6% | 0.0% | 0.8% | 0.8% | -      | - | 0.0% | - | 0.8% |        |
|       | 9               | 0.0%  | 2.3% | 0.0% | 1.6%  | 1.1%  | -          | 0.0% | 0.0% | 0.8% | 0.0% | -      | - | 0.0% | - | 0.0% |        |
|       | 10              | 0.0%  | 0.0% | 0.0% | 0.0%  | 1.0%  | -          | 0.0% | 0.0% | 0.9% | 0.0% | -      | - | 0.0% | - | 0.0% |        |
|       | 11              | 0.0%  | 0.0% | 0.0% | 1.0%  | 0.0%  | -          | 0.0% | 0.0% | 1.0% | 2.4% | -      | - | 0.0% | - | 0.0% |        |
|       | 12              | 0.0%  | 0.0% | 0.0% | 0.0%  | 1.0%  | -          | 0.0% | 0.0% | 0.0% | 1.0% | -      | - | 0.0% | - | 0.0% |        |
|       | 13              | 0.0%  | 0.0% | 0.0% | 1.6%  | 1.0%  | -          | 0.0% | 0.0% | 1.6% | 0.0% | -      | - | 0.0% | - | 0.0% |        |
|       | 14              | 0.0%  | 0.0% | 0.0% | 0.9%  | 0.0%  | -          | 0.0% | 0.0% | 1.9% | 0.0% | -      | - | 0.0% | - | 0.0% |        |
|       | 15              | 0.0%  | 0.0% | 0.0% | 1.1%  | 0.0%  | -          | 0.0% | 0.0% | 1.1% | 1.2% | -      | - | 0.0% | - | 0.0% |        |
|       | 16              | 0.0%  | 0.0% | 0.0% | 0.0%  | 0.0%  | -          | 0.0% | 0.0% | 0.0% | 0.0% | -      | - | 0.0% | - | 0.0% |        |
|       | 17              | 0.0%  | 0.0% | 0.0% | 0.0%  | 0.0%  | -          | 0.0% | 0.0% | 0.0% | 0.0% | -      | - | 0.0% | - | 0.0% |        |
|       | 18              | 0.0%  | 0.0% | 0.0% | 0.0%  | 0.0%  | -          | 0.0% | 0.0% | 0.0% | 0.0% | -      | - | 0.0% | - | 0.0% |        |
|       | 19              | 0.0%  | 0.0% | 0.0% | 1.2%  | 2.1%  | -          | 0.0% | 0.0% | 0.0% | 1.1% | -      | - | 0.0% | - | 0.0% |        |
|       | 20              | 0.0%  | 0.0% | 0.0% | 0.0%  | 0.0%  | -          | 0.0% | 0.0% | 1.1% | 1.1% | -      | - | 0.0% | - | 0.0% |        |
|       | 21              | 0.0%  | 0.0% | 0.0% | 1.9%  | 1.1%  | -          | 0.0% | 0.0% | 0.0% | 0.0% | -      | - | 0.0% | - | 0.0% |        |
|       | 22              | 0.0%  | 0.0% | 0.0% | 0.0%  | 0.0%  | -          | 0.0% | 0.0% | 1.0% | 0.0% | -      | - | 0.0% | - | 0.0% |        |
|       | 23              | 0.0%  | 0.0% | 0.0% | 0.0%  | 0.0%  | -          | 0.0% | 0.0% | 0.0% | 0.0% | -      | - | 0.0% | - | 0.0% |        |
|       | 24              | 0.0%  | 0.0% | 0.0% | 0.0%  | 0.0%  | -          | 0.0% | 0.0% | 0.0% | 0.0% | -      | - | 0.0% | - | 0.0% |        |
|       | 25              | 0.0%  | 0.0% | 0.0% | 0.0%  | 0.0%  | -          | 0.0% | 0.0% | 0.0% | 0.0% | -      | - | 0.0% | - | 0.0% |        |
|       | 26              | 0.0%  | 0.0% | 0.0% | 0.0%  | 0.0%  | -          | 0.0% | 0.0% | 0.0% | 0.0% | -      | - | 0.0% | - | 0.0% |        |
|       | 27              | 0.0%  | 0.0% | 0.0% | 0.0%  | 0.0%  | -          | 0.0% | 0.0% | 0.0% | 0.0% | -      | - | 0.0% | - | 0.0% |        |
|       | 28              | 0.0%  | 0.0% | 0.0% | 0.0%  | 0.0%  | -          | 0.0% | 0.0% | 0.0% | 0.0% | -      | - | 0.0% | - | 0.0% |        |
|       | 29              | 0.0%  | -    | 0.0% | 0.0%  | 0.0%  | -          | -    | 0.0% | 0.0% | 0.0% | -      | - | 0.0% | - | 0.0% |        |
|       | 30              | 0.0%  | -    | 0.0% | 0.0%  | 0.0%  | -          | -    | 0.0% | 0.0% | 0.0% | -      | - | 0.0% | - | 0.0% |        |

a)

| FT<br>[n. days] |    | 1000m |      |      |      |       | 1000-2000m |      |      |       |       | >2000m |   |      |      |      | P(R M)<br>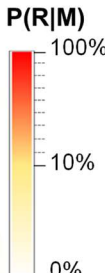 |
|-----------------|----|-------|------|------|------|-------|------------|------|------|-------|-------|--------|---|------|------|------|-----------------------------------------------------------------------------------------------|
|                 |    |       |      |      |      |       |            |      |      |       |       |        |   |      |      |      |                                                                                               |
| Sa=0            | 0  | 0.1%  | 0.5% | 0.7% | 2.5% | 2.9%  | 0.1%       | 0.2% | 0.3% | 1.4%  | 1.6%  | -      | - | 0.0% | 0.0% | 0.1% |                                                                                               |
|                 | 1  | 0.1%  | 0.5% | 0.9% | 5.8% | 6.9%  | 0.0%       | 0.2% | 0.8% | 3.8%  | 4.5%  | -      | - | 0.0% | 0.1% | 0.4% |                                                                                               |
| Sa=7            | 0  | 0.2%  | 0.3% | 0.3% | 1.7% | 2.6%  | 0.1%       | 0.2% | 0.2% | 0.6%  | 0.8%  | -      | - | 0.0% | 0.0% | 0.0% |                                                                                               |
|                 | 1  | 0.0%  | 0.5% | 0.0% | 4.4% | 3.3%  | 0.0%       | 0.8% | 0.3% | 3.2%  | 3.0%  | -      | - | 0.0% | 0.2% | 0.3% |                                                                                               |
|                 | 2  | 0.0%  | 0.3% | 1.4% | 4.7% | 6.8%  | 0.0%       | 0.0% | 0.3% | 3.7%  | 4.1%  | -      | - | 0.0% | 0.0% | 0.0% |                                                                                               |
|                 | 3  | 0.4%  | 1.1% | 0.6% | 5.8% | 3.9%  | 0.0%       | 0.4% | 0.3% | 2.9%  | 2.3%  | -      | - | 0.0% | 0.0% | 0.0% |                                                                                               |
|                 | 4  | 0.0%  | 0.5% | 2.0% | 8.1% | 4.4%  | 0.4%       | 0.5% | 1.0% | 3.3%  | 5.2%  | -      | - | 0.0% | 0.0% | 0.8% |                                                                                               |
|                 | 5  | 0.0%  | 1.0% | 3.2% | 3.3% | 7.7%  | 0.0%       | 0.0% | 1.4% | 1.4%  | 4.9%  | -      | - | 0.0% | 0.0% | 0.4% |                                                                                               |
|                 | 6  | 0.0%  | 0.6% | 0.8% | 4.0% | 7.0%  | 0.0%       | 0.0% | 0.4% | 6.2%  | 7.0%  | -      | - | 0.4% | 0.6% | 2.5% |                                                                                               |
|                 | 7  | 0.0%  | 0.0% | 1.3% | 6.1% | 7.5%  | 0.0%       | 0.0% | 1.5% | 4.8%  | 6.1%  | -      | - | 0.0% | 0.6% | 0.3% |                                                                                               |
| Sa=30           | 0  | 0.3%  | 0.4% | 0.0% | 2.2% | 2.0%  | 0.1%       | 0.1% | 0.0% | 0.9%  | 0.2%  | -      | - | 0.0% | 0.0% | 0.0% |                                                                                               |
|                 | 1  | 0.0%  | 0.4% | 0.0% | 1.0% | 2.3%  | 0.2%       | 1.2% | 0.0% | 1.0%  | 1.6%  | -      | - | 0.0% | 0.5% | 0.0% |                                                                                               |
|                 | 2  | 0.0%  | 0.3% | 0.0% | 4.1% | 3.0%  | 0.0%       | 0.0% | 0.0% | 2.5%  | 3.5%  | -      | - | 0.0% | 0.0% | 0.0% |                                                                                               |
|                 | 3  | 0.0%  | 0.0% | 0.7% | 3.1% | 3.2%  | 0.0%       | 0.0% | 0.0% | 2.6%  | 1.4%  | -      | - | 0.0% | 0.0% | 0.0% |                                                                                               |
|                 | 4  | 0.0%  | 0.0% | 0.6% | 4.9% | 16.1% | 0.0%       | 0.6% | 0.6% | 2.2%  | 6.0%  | -      | - | 0.0% | 0.0% | 0.0% |                                                                                               |
|                 | 5  | 0.0%  | 0.0% | 1.1% | 4.8% | 1.1%  | 0.0%       | 0.0% | 0.0% | 2.4%  | 0.6%  | -      | - | 0.0% | 0.0% | 0.0% |                                                                                               |
|                 | 6  | 0.0%  | 1.3% | 0.9% | 3.6% | 1.4%  | 0.6%       | 0.0% | 0.0% | 1.8%  | 2.1%  | -      | - | 0.0% | 0.0% | 0.7% |                                                                                               |
|                 | 7  | 0.0%  | 0.0% | 0.9% | 6.8% | 5.1%  | 0.0%       | 0.0% | 0.0% | 3.4%  | 2.2%  | -      | - | 0.0% | 0.0% | 0.0% |                                                                                               |
|                 | 8  | 0.0%  | 0.0% | 0.0% | 2.5% | 0.8%  | 0.0%       | 0.0% | 0.0% | 3.3%  | 0.8%  | -      | - | 0.0% | 0.0% | 0.8% |                                                                                               |
|                 | 9  | 0.0%  | 0.8% | 1.6% | 5.5% | 2.2%  | 0.0%       | 0.8% | 0.8% | 1.6%  | 2.2%  | -      | - | 0.0% | 0.0% | 1.1% |                                                                                               |
|                 | 10 | 0.0%  | 1.9% | 2.0% | 4.7% | 1.0%  | 0.0%       | 0.6% | 2.0% | 2.8%  | 1.0%  | -      | - | 0.0% | 0.0% | 0.0% |                                                                                               |
|                 | 11 | 0.0%  | 0.8% | 0.7% | 4.0% | 0.0%  | 0.0%       | 0.0% | 0.7% | 2.0%  | 1.2%  | -      | - | 0.0% | 0.0% | 0.0% |                                                                                               |
|                 | 12 | 0.9%  | 0.0% | 1.7% | 4.0% | 0.0%  | 0.0%       | 0.0% | 0.8% | 4.0%  | 0.0%  | -      | - | 0.0% | 0.0% | 0.0% |                                                                                               |
|                 | 13 | 0.0%  | 1.1% | 1.0% | 3.3% | 2.0%  | 0.0%       | 0.0% | 2.0% | 2.4%  | 2.0%  | -      | - | 0.0% | 0.0% | 0.0% |                                                                                               |
|                 | 14 | 0.0%  | 0.0% | 2.2% | 8.5% | 2.4%  | 0.0%       | 0.0% | 0.7% | 3.8%  | 4.0%  | -      | - | 0.0% | 0.0% | 0.0% |                                                                                               |
|                 | 15 | 0.0%  | 0.0% | 1.9% | 6.8% | 4.8%  | 0.0%       | 0.0% | 0.0% | 1.1%  | 3.6%  | -      | - | 0.0% | 0.0% | 1.2% |                                                                                               |
|                 | 16 | 0.0%  | 0.0% | 4.9% | 6.5% | 8.2%  | 0.0%       | 0.0% | 0.7% | 2.2%  | 7.1%  | -      | - | 0.0% | 0.0% | 0.0% |                                                                                               |
|                 | 17 | 0.0%  | 1.1% | 1.5% | 3.7% | 7.5%  | 0.0%       | 0.0% | 0.0% | 2.5%  | 4.7%  | -      | - | 0.0% | 0.0% | 0.9% |                                                                                               |
|                 | 18 | 0.0%  | 1.6% | 0.8% | 4.8% | 5.0%  | 0.0%       | 1.6% | 0.0% | 1.2%  | 4.2%  | -      | - | 0.0% | 1.2% | 0.0% |                                                                                               |
|                 | 19 | 0.0%  | 1.6% | 1.9% | 1.2% | 8.5%  | 0.0%       | 0.0% | 4.8% | 1.2%  | 5.3%  | -      | - | 0.0% | 1.2% | 0.0% |                                                                                               |
|                 | 20 | 0.0%  | 0.0% | 0.9% | 4.3% | 5.6%  | 0.0%       | 0.0% | 0.0% | 6.4%  | 7.9%  | -      | - | 0.9% | 0.0% | 1.1% |                                                                                               |
|                 | 21 | 0.0%  | 0.0% | 1.3% | 1.9% | 9.2%  | 0.0%       | 0.0% | 2.6% | 3.8%  | 6.9%  | -      | - | 0.0% | 0.0% | 2.3% |                                                                                               |
|                 | 22 | 0.0%  | 0.0% | 0.0% | 2.1% | 8.7%  | 0.0%       | 0.0% | 0.0% | 4.2%  | 13.0% | -      | - | 0.0% | 1.0% | 0.0% |                                                                                               |
|                 | 23 | 0.0%  | 0.0% | 0.0% | 6.1% | 7.0%  | 0.0%       | 0.0% | 0.0% | 0.0%  | 14.1% | -      | - | 0.0% | 0.0% | 0.0% |                                                                                               |
|                 | 24 | 0.0%  | 0.0% | 2.5% | 2.7% | 14.6% | 0.0%       | 0.0% | 2.5% | 2.7%  | 12.4% | -      | - | 0.0% | 0.0% | 1.1% |                                                                                               |
|                 | 25 | 0.0%  | 0.0% | 2.3% | 2.9% | 11.8% | 0.0%       | 0.0% | 0.0% | 5.9%  | 7.9%  | -      | - | 0.0% | 0.0% | 1.3% |                                                                                               |
|                 | 26 | 0.0%  | 0.0% | 0.0% | 7.7% | 27.0% | 0.0%       | 0.0% | 0.0% | 7.7%  | 8.1%  | -      | - | 0.0% | 0.0% | 5.4% |                                                                                               |
|                 | 27 | 0.0%  | 0.0% | 0.0% | 0.0% | 15.8% | 0.0%       | 0.0% | 0.0% | 0.0%  | 0.0%  | -      | - | 0.0% | 0.0% | 0.0% |                                                                                               |
|                 | 28 | 0.0%  | 0.0% | 0.0% | 8.3% | 0.0%  | 0.0%       | 0.0% | 4.3% | 8.3%  | 0.0%  | -      | - | 0.0% | 0.0% | 0.0% |                                                                                               |
|                 | 29 | 0.0%  | -    | 0.0% | 5.3% | 0.0%  | 0.0%       | -    | 0.0% | 21.1% | 0.0%  | -      | - | 0.0% | 5.3% | 0.0% |                                                                                               |
|                 | 30 | 0.0%  | -    | 0.0% | 0.0% | 0.0%  | 0.0%       | -    | 0.0% | 6.3%  | 0.0%  | -      | - | 0.0% | 0.0% | 0.0% |                                                                                               |

b)

1

2

3

4

5

1

2

3

4

5

1

2

3

4

5

b)



| FT<br>[n. days] |    | 1000m |      |      |      |      | 1000-2000m |      |      |      |      | >2000m |      |      |      |      | P(R M)<br>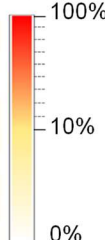 |
|-----------------|----|-------|------|------|------|------|------------|------|------|------|------|--------|------|------|------|------|-----------------------------------------------------------------------------------------------|
|                 |    |       |      |      |      |      |            |      |      |      |      |        |      |      |      |      |                                                                                               |
| Sa=0            | 0  | 0.1%  | 0.4% | 0.9% | 3.5% | 4.1% | 0.0%       | 0.2% | 0.7% | 2.6% | 3.4% | -      | 0.1% | 0.0% | 0.7% | 1.5% |                                                                                               |
|                 | 1  | 0.1%  | 0.8% | 1.0% | 4.7% | 2.9% | 0.1%       | 0.5% | 0.5% | 3.1% | 1.9% | -      | 0.0% | 0.4% | 0.7% | 0.7% |                                                                                               |
| Sa=7            | 0  | 0.1%  | 0.5% | 1.0% | 3.4% | 4.5% | 0.0%       | 0.2% | 0.8% | 2.2% | 4.0% | -      | 0.1% | 0.0% | 0.8% | 1.5% |                                                                                               |
|                 | 1  | 0.0%  | 0.8% | 0.6% | 4.2% | 5.0% | 0.0%       | 0.3% | 0.6% | 4.0% | 2.8% | -      | 0.0% | 0.3% | 1.0% | 1.9% |                                                                                               |
|                 | 2  | 0.0%  | 0.0% | 1.0% | 6.3% | 3.7% | 0.3%       | 0.5% | 0.7% | 3.9% | 3.1% | -      | 0.0% | 0.3% | 0.5% | 0.7% |                                                                                               |
|                 | 3  | 0.4%  | 0.0% | 0.9% | 3.6% | 3.2% | 0.0%       | 0.4% | 0.3% | 2.6% | 1.9% | -      | 0.0% | 0.0% | 0.0% | 1.6% |                                                                                               |
|                 | 4  | 0.0%  | 1.8% | 0.7% | 4.9% | 2.0% | 0.0%       | 0.0% | 1.0% | 3.7% | 2.8% | -      | 0.0% | 0.3% | 1.2% | 1.2% |                                                                                               |
|                 | 5  | 0.0%  | 0.5% | 1.8% | 2.4% | 0.4% | 0.0%       | 0.5% | 0.4% | 2.4% | 0.4% | -      | 0.0% | 0.4% | 0.0% | 0.4% |                                                                                               |
|                 | 6  | 0.0%  | 0.0% | 1.3% | 2.3% | 2.0% | 0.0%       | 0.0% | 0.4% | 1.7% | 2.5% | -      | 0.0% | 0.0% | 0.0% | 0.0% |                                                                                               |
|                 | 7  | 0.0%  | 0.0% | 0.8% | 0.3% | 0.9% | 0.0%       | 0.0% | 0.0% | 0.3% | 0.9% | -      | 0.0% | 0.5% | 0.6% | 0.0% |                                                                                               |
| Sa=30           | 0  | 0.1%  | 0.2% | 0.2% | 2.0% | 5.2% | 0.0%       | 0.0% | 0.7% | 0.4% | 4.2% | -      | 0.1% | 0.0% | 0.2% | 1.6% |                                                                                               |
|                 | 1  | 0.0%  | 0.0% | 0.6% | 3.4% | 9.4% | 0.0%       | 0.0% | 1.2% | 1.0% | 7.1% | -      | 0.0% | 0.0% | 0.5% | 2.3% |                                                                                               |
|                 | 2  | 0.0%  | 0.0% | 0.0% | 4.6% | 3.5% | 0.0%       | 0.3% | 0.0% | 1.2% | 2.0% | -      | 0.0% | 0.0% | 1.7% | 1.5% |                                                                                               |
|                 | 3  | 0.0%  | 0.9% | 2.8% | 4.6% | 3.6% | 0.7%       | 0.9% | 0.7% | 1.0% | 2.7% | -      | 0.0% | 0.0% | 0.5% | 2.7% |                                                                                               |
|                 | 4  | 0.0%  | 0.0% | 0.0% | 5.4% | 1.3% | 0.0%       | 1.1% | 0.0% | 5.4% | 1.3% | -      | 0.0% | 0.0% | 1.1% | 0.7% |                                                                                               |
|                 | 5  | 0.9%  | 0.7% | 2.2% | 6.3% | 1.7% | 0.0%       | 0.0% | 0.0% | 6.0% | 0.6% | -      | 0.0% | 2.2% | 1.6% | 0.0% |                                                                                               |
|                 | 6  | 0.0%  | 0.0% | 1.9% | 4.1% | 1.4% | 0.0%       | 0.0% | 0.0% | 2.4% | 2.1% | -      | 0.6% | 0.0% | 0.0% | 1.4% |                                                                                               |
|                 | 7  | 0.0%  | 0.7% | 0.9% | 5.1% | 0.7% | 0.0%       | 0.0% | 0.9% | 6.8% | 1.5% | -      | 0.0% | 0.0% | 1.7% | 0.0% |                                                                                               |
|                 | 8  | 0.0%  | 0.6% | 0.6% | 6.6% | 0.8% | 0.0%       | 0.6% | 0.6% | 4.1% | 0.0% | -      | 0.0% | 0.6% | 0.8% | 0.0% |                                                                                               |
|                 | 9  | 0.0%  | 0.8% | 3.1% | 1.6% | 1.1% | 0.0%       | 0.0% | 2.3% | 4.7% | 1.1% | -      | 0.0% | 1.6% | 0.0% | 0.0% |                                                                                               |
|                 | 10 | 0.0%  | 0.6% | 1.3% | 4.7% | 0.0% | 0.0%       | 0.6% | 0.0% | 2.8% | 5.2% | -      | 0.0% | 0.0% | 0.9% | 1.0% |                                                                                               |
|                 | 11 | 0.0%  | 1.6% | 3.5% | 3.0% | 1.2% | 0.0%       | 0.0% | 0.0% | 4.0% | 3.5% | -      | 0.0% | 0.0% | 2.0% | 0.0% |                                                                                               |
|                 | 12 | 0.9%  | 1.0% | 0.0% | 2.4% | 4.1% | 0.0%       | 0.0% | 0.0% | 0.8% | 4.1% | -      | 0.0% | 0.0% | 0.0% | 0.0% |                                                                                               |
|                 | 13 | 0.0%  | 0.0% | 1.0% | 4.9% | 5.9% | 0.0%       | 0.0% | 0.0% | 3.3% | 4.0% | -      | 0.0% | 0.0% | 0.0% | 0.0% |                                                                                               |
|                 | 14 | 0.0%  | 0.0% | 0.0% | 2.8% | 4.0% | 0.0%       | 0.0% | 1.5% | 0.9% | 1.6% | -      | 0.0% | 0.0% | 0.0% | 0.8% |                                                                                               |
|                 | 15 | 0.0%  | 0.0% | 1.3% | 0.0% | 3.6% | 0.0%       | 0.0% | 0.6% | 1.1% | 2.4% | -      | 0.0% | 0.0% | 0.0% | 0.0% |                                                                                               |
|                 | 16 | 0.0%  | 2.3% | 0.0% | 2.2% | 3.1% | 0.0%       | 0.0% | 0.7% | 4.3% | 0.0% | -      | 0.0% | 0.0% | 0.0% | 3.1% |                                                                                               |
|                 | 17 | 0.0%  | 2.3% | 0.7% | 3.7% | 2.8% | 0.0%       | 0.0% | 0.0% | 3.7% | 0.0% | -      | 0.0% | 0.0% | 0.0% | 0.9% |                                                                                               |
|                 | 18 | 0.0%  | 0.0% | 1.6% | 1.2% | 2.5% | 0.0%       | 0.0% | 0.8% | 2.4% | 4.2% | -      | 0.0% | 0.0% | 0.0% | 1.7% |                                                                                               |
|                 | 19 | 0.0%  | 1.6% | 1.0% | 4.9% | 1.1% | 0.0%       | 1.6% | 1.0% | 1.2% | 5.3% | -      | 0.0% | 0.0% | 1.2% | 0.0% |                                                                                               |
|                 | 20 | 0.0%  | 0.0% | 1.7% | 3.2% | 0.0% | 0.0%       | 1.9% | 0.0% | 1.1% | 3.4% | -      | 0.0% | 0.0% | 1.1% | 3.4% |                                                                                               |
|                 | 21 | 0.0%  | 4.1% | 1.3% | 0.0% | 3.4% | 0.0%       | 0.0% | 1.3% | 1.9% | 1.1% | -      | 0.0% | 0.0% | 0.0% | 1.1% |                                                                                               |
|                 | 22 | 0.0%  | 0.0% | 1.2% | 0.0% | 2.9% | 0.0%       | 0.0% | 1.2% | 3.1% | 1.4% | -      | 0.0% | 0.0% | 1.0% | 0.0% |                                                                                               |
|                 | 23 | 0.0%  | 0.0% | 0.0% | 1.5% | 2.8% | 0.0%       | 0.0% | 0.0% | 1.5% | 1.4% | -      | 0.0% | 1.6% | 1.5% | 0.0% |                                                                                               |
|                 | 24 | 0.0%  | 0.0% | 0.0% | 2.7% | 1.1% | 0.0%       | 0.0% | 0.0% | 2.7% | 0.0% | -      | 0.0% | 0.0% | 0.0% | 0.0% |                                                                                               |
|                 | 25 | 0.0%  | 0.0% | 0.0% | 0.0% | 0.0% | 0.0%       | 0.0% | 0.0% | 0.0% | 0.0% | -      | 0.0% | 0.0% | 0.0% | 1.3% |                                                                                               |
|                 | 26 | 0.0%  | 0.0% | 0.0% | 3.8% | 0.0% | 0.0%       | 0.0% | 0.0% | 0.0% | 0.0% | -      | 0.0% | 0.0% | 0.0% | 0.0% |                                                                                               |
|                 | 27 | 0.0%  | 0.0% | 0.0% | 0.0% | 0.0% | 0.0%       | 0.0% | 0.0% | 0.0% | 0.0% | -      | 0.0% | 0.0% | 0.0% | 0.0% |                                                                                               |
|                 | 28 | 0.0%  | 0.0% | 0.0% | 0.0% | 0.0% | 0.0%       | 0.0% | 0.0% | 0.0% | 0.0% | -      | 0.0% | 0.0% | 0.0% | 0.0% |                                                                                               |
|                 | 29 | 0.0%  | -    | 0.0% | 0.0% | 0.0% | 0.0%       | -    | 0.0% | 0.0% | 0.0% | -      | -    | 0.0% | 0.0% | 0.0% |                                                                                               |
|                 | 30 | 0.0%  | -    | 0.0% | 0.0% | 0.0% | 0.0%       | 0.0% | -    | 0.0% | 0.0% | -      | -    | 0.0% | 0.0% | 0.0% |                                                                                               |
| c)              |    | 1     | 2    | 3    | 4    | 5    | 1          | 2    | 3    | 4    | 5    | 1      | 2    | 3    | 4    | 5    |                                                                                               |

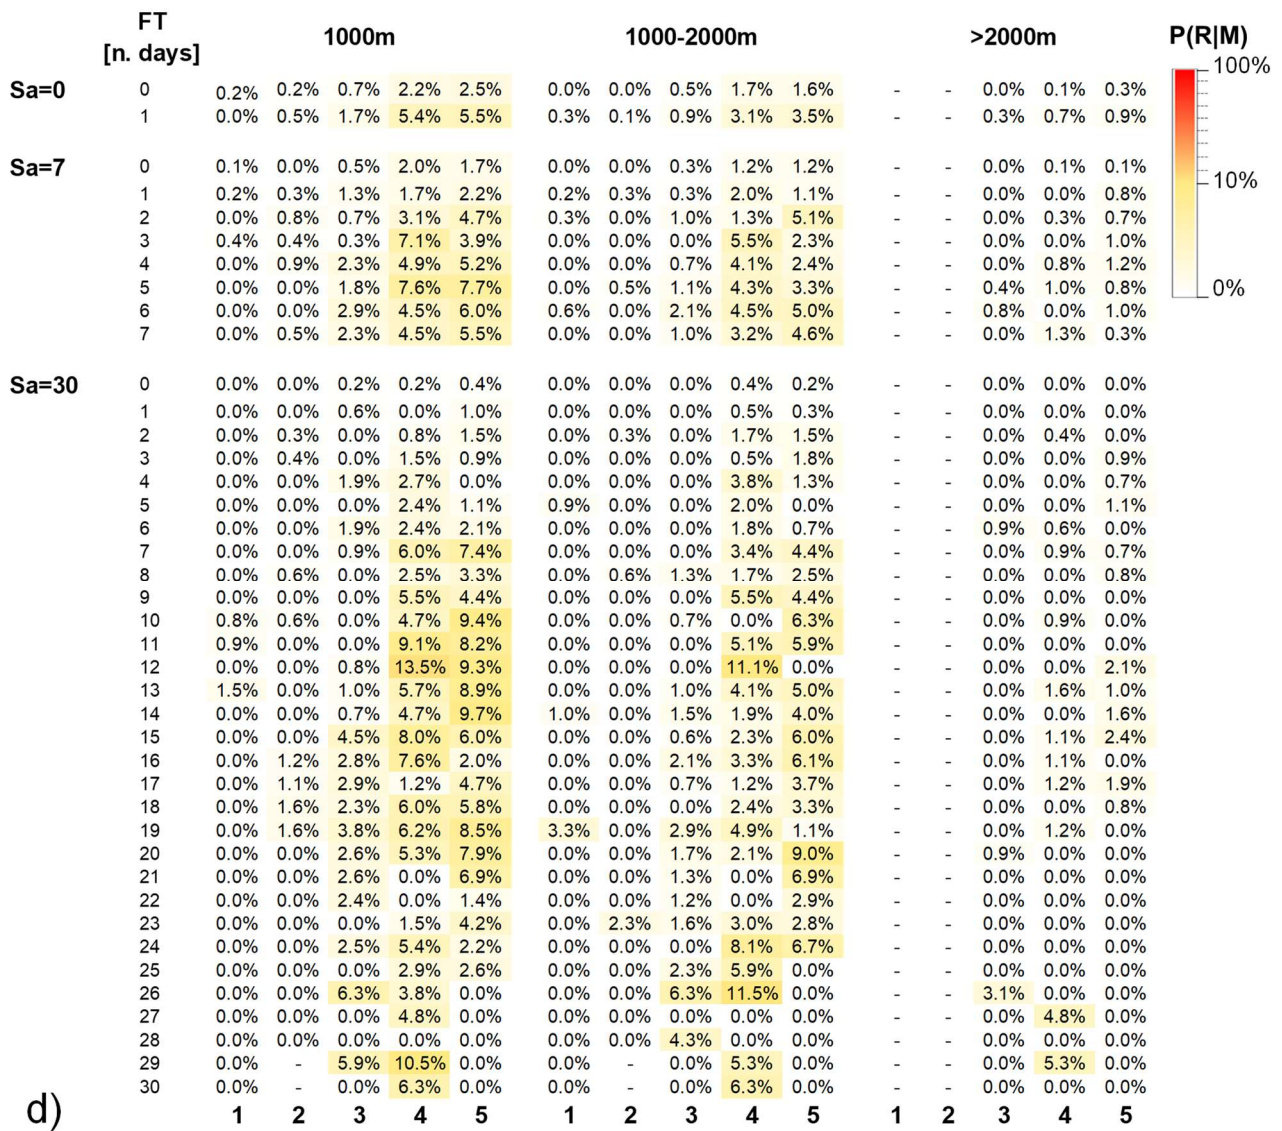

Fig. S29 Conditional probability,  $P(R|M)$ , calculated with Bayesian's method of freeze-thaw cycle minimum case with different aggregation scales  $S_a$  (0, 7, 30) and for different altitudes (<1000m, 1000m-2000m, >2000m) for 5 decades (1=1970-1979; 2=1980-1989; 3=1990-1999; 4=2000-2009; 5=2010-2019). (a) winter; (b) spring; (c) summer (d) autumn.

## S2.6 Icing

### S2.6.1 Maximum calculated time-series

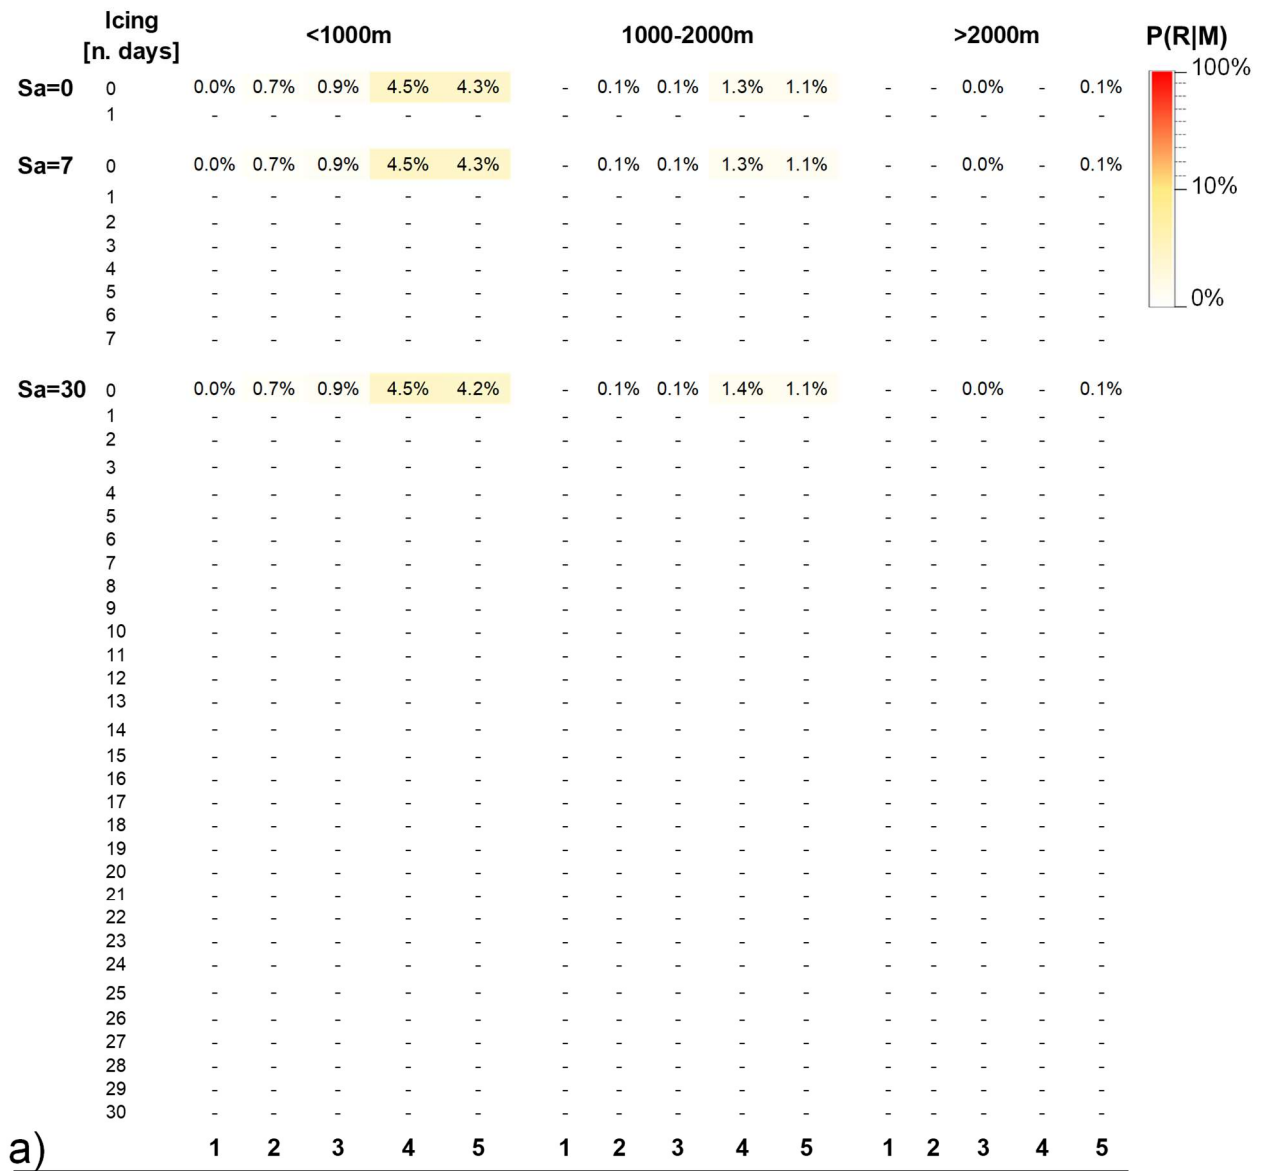

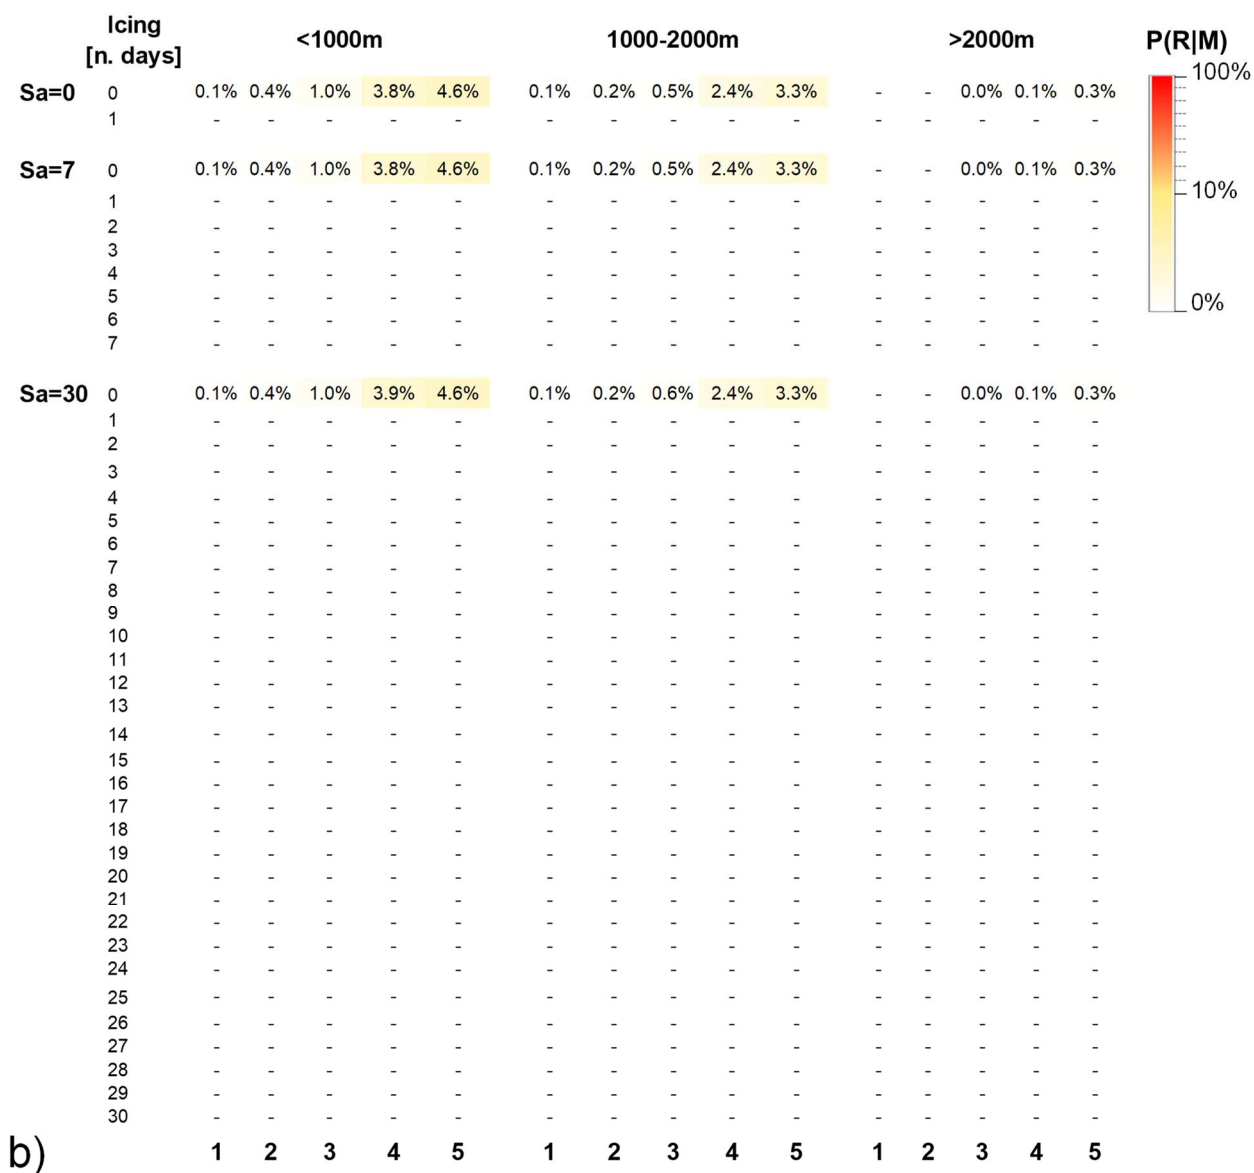

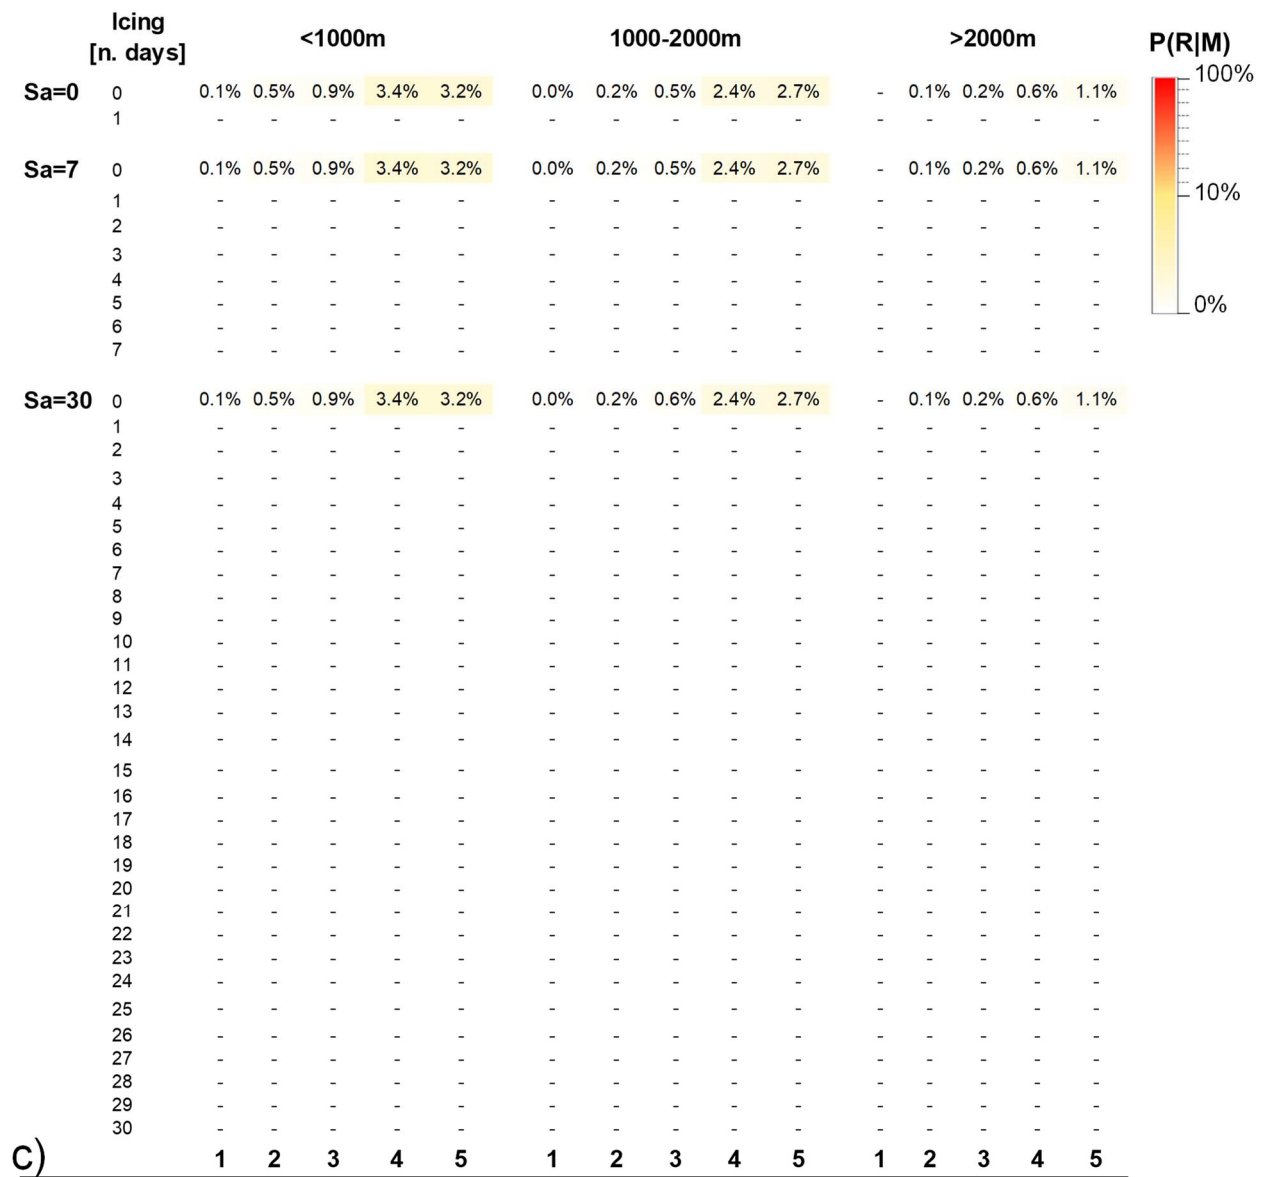



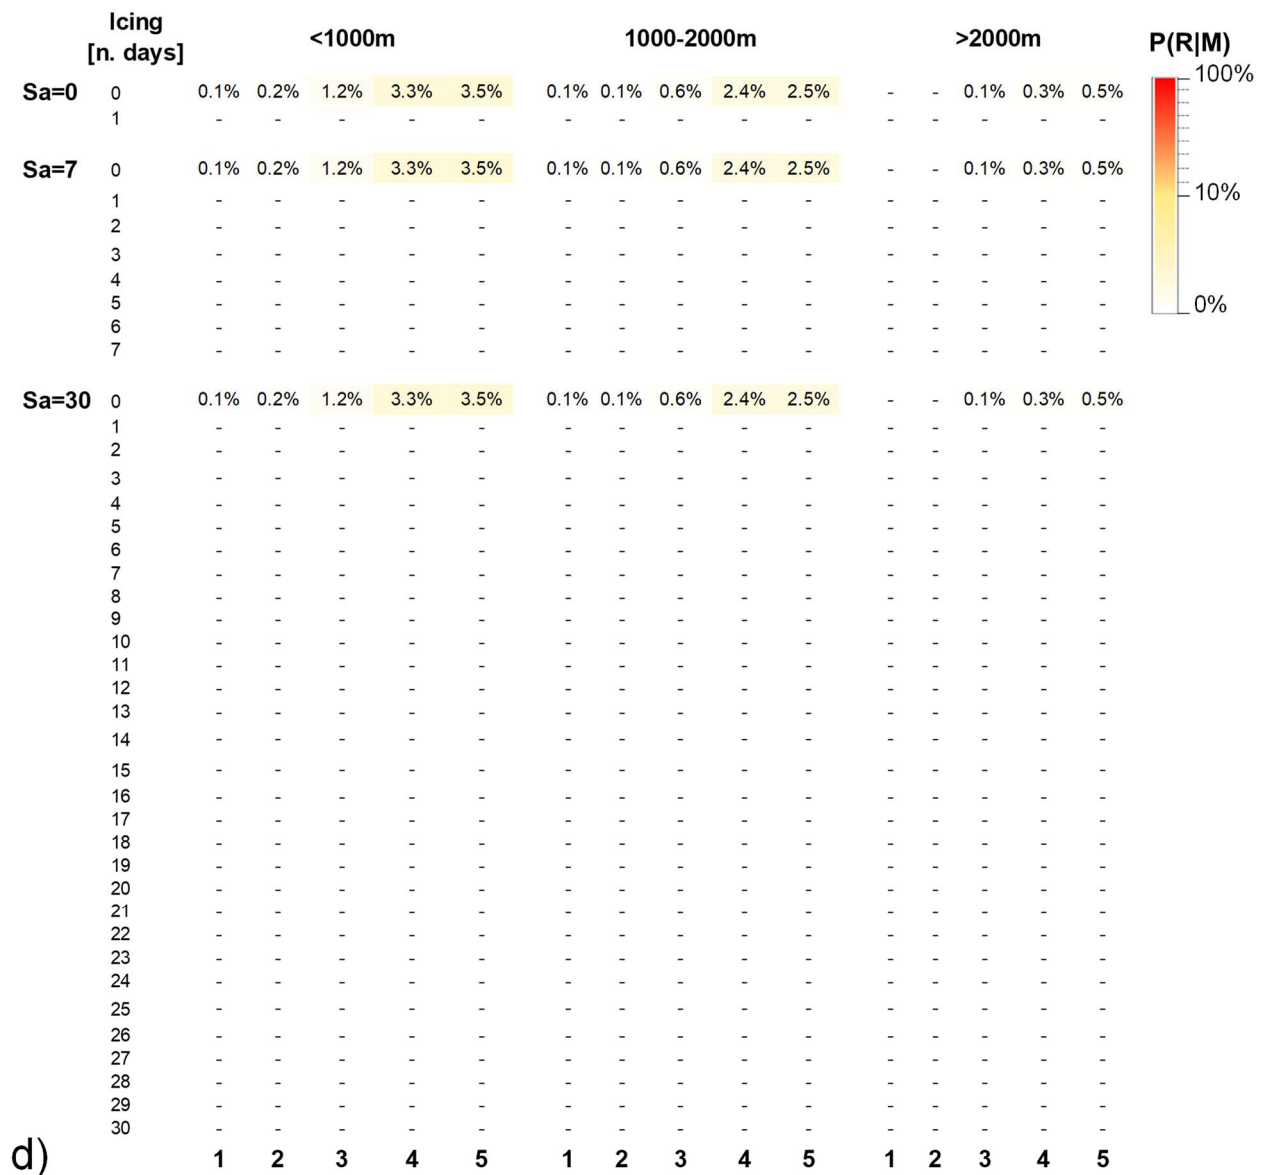

Fig. S30 Conditional probability,  $P(R|M)$ , calculated with Bayesian's method of icing maximum case with different aggregation scales  $S_a$  (0, 7, 30) and for different altitudes (<1000m, 1000m-2000m, >2000m) for 5 decades (1=1970-1979; 2=1980-1989; 3=1990-1999; 4=2000-2009; 5=2010-2019). (a) winter; (b) spring; (c) summer (d) autumn.

## S2.6.2 Medium calculated time-series

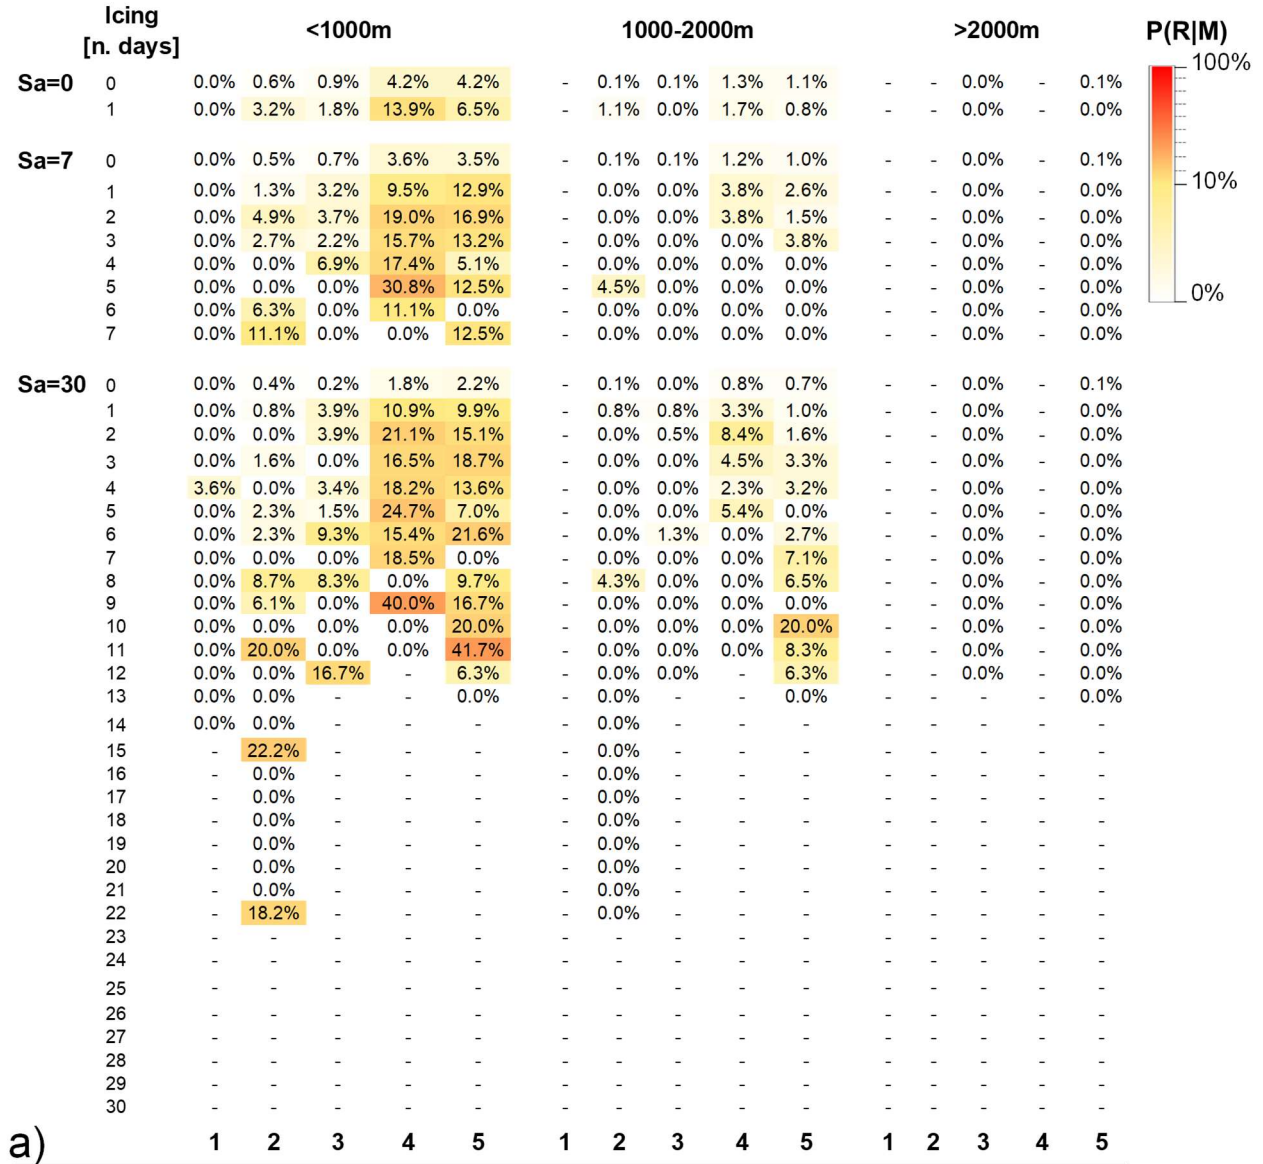

| Icing<br>[n. days] |    | <1000m |      |      |      |       | 1000-2000m |      |      |      |      | >2000m |   |      |      |      | P(R M) |
|--------------------|----|--------|------|------|------|-------|------------|------|------|------|------|--------|---|------|------|------|--------|
|                    |    |        |      |      |      |       |            |      |      |      |      |        |   |      |      |      |        |
| Sa=0               | 0  | 0.1%   | 0.5% | 1.0% | 4.0% | 4.8%  | 0.1%       | 0.2% | 0.6% | 2.5% | 3.5% | -      | - | 0.0% | 0.1% | 0.3% |        |
|                    | 1  | 1.4%   | 0.0% | 0.0% | 0.9% | 0.0%  | 0.0%       | 0.0% | 0.0% | 0.0% | 0.0% | -      | - | 0.0% | 0.0% | 0.0% |        |
| Sa=7               | 0  | 0.1%   | 0.5% | 1.1% | 4.0% | 4.9%  | 0.1%       | 0.2% | 0.6% | 2.6% | 3.6% | -      | - | 0.0% | 0.1% | 0.4% |        |
|                    | 1  | 0.0%   | 0.0% | 0.0% | 2.9% | 0.9%  | 0.0%       | 0.0% | 0.0% | 1.9% | 0.0% | -      | - | 0.0% | 0.0% | 0.0% |        |
|                    | 2  | 0.0%   | 0.0% | 0.0% | 0.0% | 0.0%  | 0.0%       | 0.0% | 0.0% | 0.0% | 0.0% | -      | - | 0.0% | 0.0% | 0.0% |        |
|                    | 3  | 0.0%   | 0.0% | 0.0% | 2.0% | 1.9%  | 0.0%       | 0.0% | 0.0% | 0.0% | 0.0% | -      | - | 0.0% | 0.0% | 0.0% |        |
|                    | 4  | 0.0%   | 0.0% | 0.0% | 0.0% | 0.0%  | 0.0%       | 0.0% | 0.0% | 0.0% | 0.0% | -      | - | 0.0% | 0.0% | 0.0% |        |
|                    | 5  | 0.0%   | 0.0% | 0.0% | 0.0% | 0.0%  | 0.0%       | 0.0% | 0.0% | 0.0% | 0.0% | -      | - | 0.0% | 0.0% | 0.0% |        |
|                    | 6  | 0.0%   | 0.0% | 0.0% | 0.0% | 0.0%  | 0.0%       | 0.0% | 0.0% | 0.0% | 0.0% | -      | - | 0.0% | 0.0% | 0.0% |        |
|                    | 7  | 14.3%  | 0.0% | 0.0% | 0.0% | 0.0%  | 0.0%       | 0.0% | 0.0% | 0.0% | 0.0% | -      | - | 0.0% | 0.0% | 0.0% |        |
| Sa=30              | 0  | 0.1%   | 0.5% | 1.1% | 3.9% | 4.5%  | 0.1%       | 0.3% | 0.7% | 2.4% | 3.6% | -      | - | 0.0% | 0.2% | 0.4% |        |
|                    | 1  | 0.0%   | 0.0% | 0.8% | 9.8% | 4.0%  | 0.0%       | 0.0% | 0.0% | 7.7% | 1.0% | -      | - | 0.0% | 0.0% | 0.0% |        |
|                    | 2  | 0.0%   | 1.7% | 0.5% | 1.1% | 8.7%  | 0.0%       | 0.0% | 0.0% | 0.0% | 5.6% | -      | - | 0.0% | 0.0% | 0.0% |        |
|                    | 3  | 0.0%   | 0.0% | 0.0% | 4.5% | 0.0%  | 0.0%       | 0.0% | 0.0% | 2.3% | 0.0% | -      | - | 0.0% | 0.0% | 0.0% |        |
|                    | 4  | 0.0%   | 0.0% | 1.7% | 0.0% | 2.4%  | 0.0%       | 0.0% | 0.0% | 0.0% | 0.8% | -      | - | 0.0% | 0.0% | 0.0% |        |
|                    | 5  | 0.0%   | 0.0% | 0.0% | 0.0% | 14.0% | 0.0%       | 0.0% | 0.0% | 0.0% | 5.3% | -      | - | 0.0% | 0.0% | 0.0% |        |
|                    | 6  | 0.0%   | 0.0% | 0.0% | 0.0% | 0.0%  | 0.0%       | 0.0% | 0.0% | 0.0% | 2.7% | -      | - | 0.0% | 0.0% | 0.0% |        |
|                    | 7  | 4.1%   | 0.0% | 5.6% | 0.0% | 21.4% | 2.0%       | 0.0% | 0.0% | 0.0% | 3.6% | -      | - | 0.0% | 0.0% | 0.0% |        |
|                    | 8  | 0.0%   | 0.0% | 0.0% | 0.0% | 0.0%  | 0.0%       | 0.0% | 0.0% | 0.0% | 0.0% | -      | - | 0.0% | 0.0% | 0.0% |        |
|                    | 9  | 0.0%   | 0.0% | 0.0% | 0.0% | 0.0%  | 0.0%       | 0.0% | 0.0% | 0.0% | 0.0% | -      | - | 0.0% | 0.0% | 0.0% |        |
|                    | 10 | 0.0%   | 0.0% | 0.0% | 0.0% | 0.0%  | 0.0%       | 0.0% | 0.0% | 0.0% | 0.0% | -      | - | 0.0% | 0.0% | 0.0% |        |
|                    | 11 | 0.0%   | 0.0% | 0.0% | 0.0% | 0.0%  | 0.0%       | 0.0% | 0.0% | 0.0% | 0.0% | -      | - | 0.0% | 0.0% | 0.0% |        |
|                    | 12 | 0.0%   | 0.0% | 0.0% | -    | 6.3%  | 0.0%       | 0.0% | 0.0% | -    | 0.0% | -      | - | 0.0% | -    | 0.0% |        |
|                    | 13 | 0.0%   | 0.0% | -    | -    | 0.0%  | 0.0%       | 0.0% | -    | -    | 0.0% | -      | - | -    | -    | 0.0% |        |
|                    | 14 | 0.0%   | 0.0% | -    | -    | -     | 0.0%       | 0.0% | -    | -    | -    | -      | - | -    | -    | -    |        |
|                    | 15 | -      | 0.0% | -    | -    | -     | -          | 0.0% | -    | -    | -    | -      | - | -    | -    | -    |        |
|                    | 16 | -      | 0.0% | -    | -    | -     | -          | 0.0% | -    | -    | -    | -      | - | -    | -    | -    |        |
|                    | 17 | -      | 0.0% | -    | -    | -     | -          | 0.0% | -    | -    | -    | -      | - | -    | -    | -    |        |
|                    | 18 | -      | 0.0% | -    | -    | -     | -          | 0.0% | -    | -    | -    | -      | - | -    | -    | -    |        |
|                    | 19 | -      | 0.0% | -    | -    | -     | -          | 0.0% | -    | -    | -    | -      | - | -    | -    | -    |        |
|                    | 20 | -      | 0.0% | -    | -    | -     | -          | 0.0% | -    | -    | -    | -      | - | -    | -    | -    |        |
|                    | 21 | -      | 0.0% | -    | -    | -     | -          | 0.0% | -    | -    | -    | -      | - | -    | -    | -    |        |
|                    | 22 | -      | 0.0% | -    | -    | -     | -          | 0.0% | -    | -    | -    | -      | - | -    | -    | -    |        |
|                    | 23 | -      | -    | -    | -    | -     | -          | -    | -    | -    | -    | -      | - | -    | -    | -    |        |
|                    | 24 | -      | -    | -    | -    | -     | -          | -    | -    | -    | -    | -      | - | -    | -    | -    |        |
|                    | 25 | -      | -    | -    | -    | -     | -          | -    | -    | -    | -    | -      | - | -    | -    | -    |        |
|                    | 26 | -      | -    | -    | -    | -     | -          | -    | -    | -    | -    | -      | - | -    | -    | -    |        |
|                    | 27 | -      | -    | -    | -    | -     | -          | -    | -    | -    | -    | -      | - | -    | -    | -    |        |
|                    | 28 | -      | -    | -    | -    | -     | -          | -    | -    | -    | -    | -      | - | -    | -    | -    |        |
|                    | 29 | -      | -    | -    | -    | -     | -          | -    | -    | -    | -    | -      | - | -    | -    | -    |        |
|                    | 30 | -      | -    | -    | -    | -     | -          | -    | -    | -    | -    | -      | - | -    | -    | -    |        |
| b)                 |    | 1      | 2    | 3    | 4    | 5     | 1          | 2    | 3    | 4    | 5    | 1      | 2 | 3    | 4    | 5    |        |

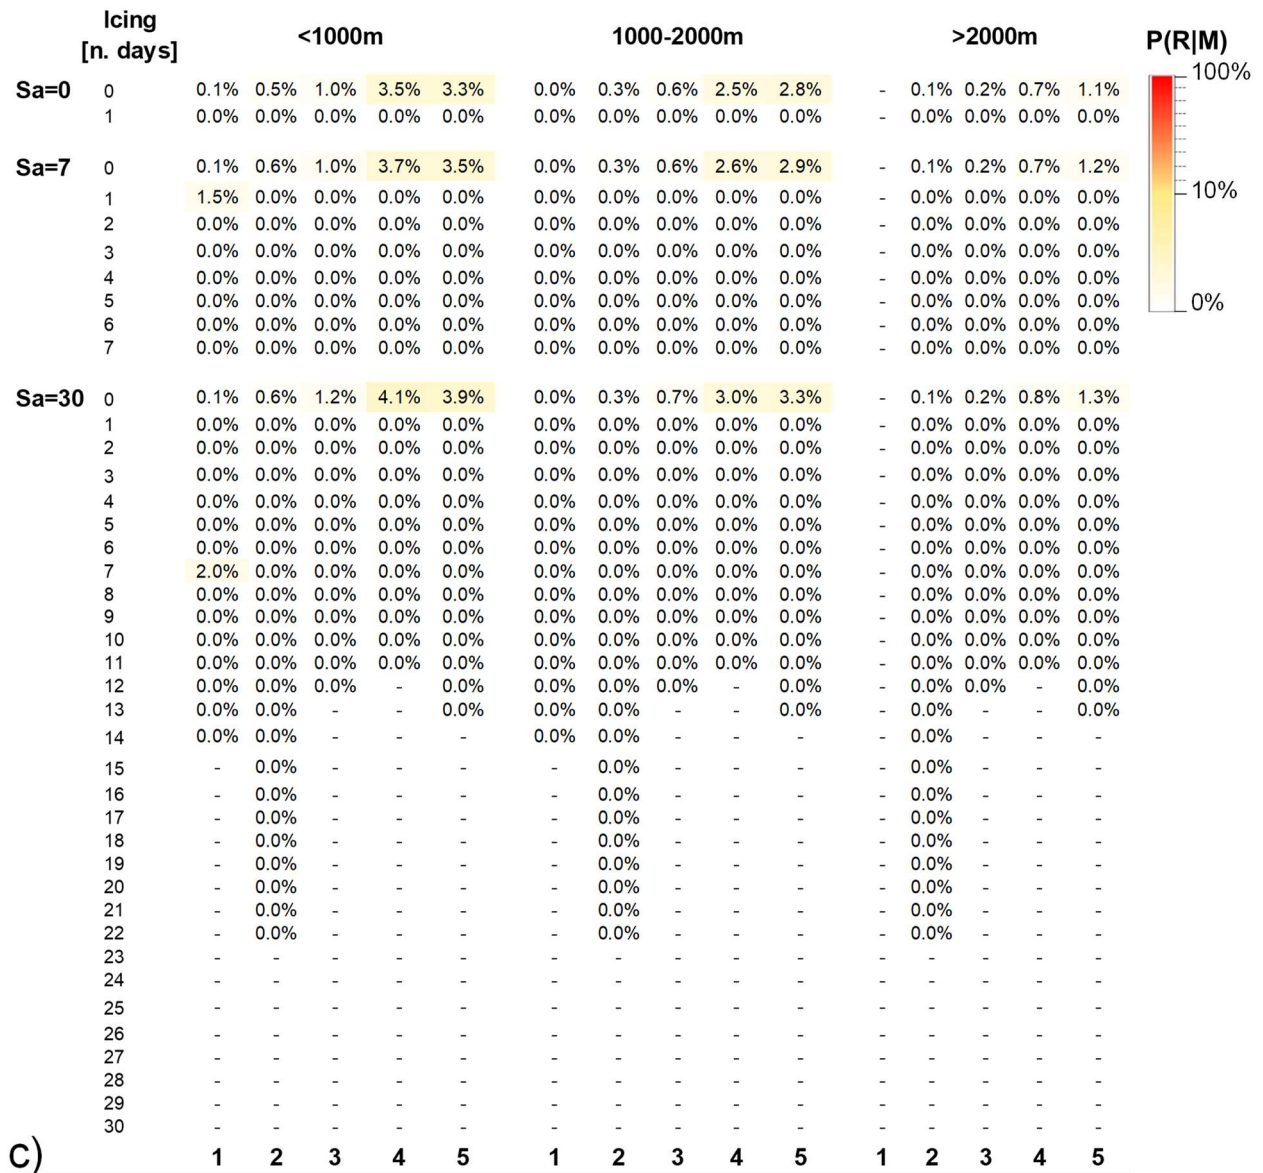





### S2.6.3 Minimum calculated time-series

| Icing<br>[n. days] |    | <1000m |      |      |       |       | 1000-2000m |      |      |      |      | >2000m |   |      |   |      | P(R M) |
|--------------------|----|--------|------|------|-------|-------|------------|------|------|------|------|--------|---|------|---|------|--------|
|                    |    |        |      |      |       |       |            |      |      |      |      |        |   |      |   |      |        |
| Sa=0               | 0  | 0.0%   | 0.1% | 0.1% | 0.1%  | 0.3%  | -          | 0.0% | 0.1% | 0.1% | 0.2% | -      | - | 0.1% | - | 0.0% |        |
|                    | 1  | 0.0%   | 0.4% | 1.1% | 3.5%  | 2.8%  | -          | 0.2% | 0.0% | 2.3% | 1.6% | -      | - | 0.0% | - | 0.2% |        |
| Sa=7               | 0  | 0.0%   | 0.0% | 0.0% | 0.0%  | 0.0%  | -          | 0.0% | 0.0% | 0.0% | 0.0% | -      | - | 0.0% | - | 0.0% |        |
|                    | 1  | 0.0%   | 0.0% | 0.0% | 0.0%  | 0.6%  | -          | 0.0% | 0.0% | 0.0% | 0.0% | -      | - | 0.0% | - | 0.0% |        |
|                    | 2  | 0.0%   | 0.0% | 0.0% | 0.0%  | 1.3%  | -          | 0.0% | 0.9% | 0.8% | 0.6% | -      | - | 0.9% | - | 0.0% |        |
|                    | 3  | 0.0%   | 0.0% | 0.0% | 0.9%  | 0.8%  | -          | 0.0% | 0.0% | 0.0% | 0.8% | -      | - | 0.0% | - | 0.0% |        |
|                    | 4  | 0.0%   | 0.0% | 0.0% | 1.9%  | 4.6%  | -          | 0.0% | 0.0% | 2.8% | 4.6% | -      | - | 0.0% | - | 0.0% |        |
|                    | 5  | 0.0%   | 0.9% | 1.3% | 0.7%  | 3.6%  | -          | 0.0% | 0.0% | 0.7% | 0.7% | -      | - | 0.0% | - | 0.7% |        |
|                    | 6  | 0.0%   | 0.7% | 2.8% | 4.5%  | 3.2%  | -          | 0.0% | 0.0% | 1.3% | 2.6% | -      | - | 0.0% | - | 0.0% |        |
|                    | 7  | 0.0%   | 1.4% | 1.4% | 8.5%  | 5.7%  | -          | 0.6% | 0.3% | 3.9% | 2.2% | -      | - | 0.0% | - | 0.3% |        |
| Sa=30              | 0  | 0.0%   | 0.0% | 0.0% | 0.0%  | 0.0%  | -          | 0.0% | 0.0% | 0.0% | 0.0% | -      | - | 0.0% | - | 0.0% |        |
|                    | 1  | 0.0%   | 0.0% | 0.0% | 0.0%  | 0.0%  | -          | 0.0% | 0.0% | 0.0% | 0.0% | -      | - | 0.0% | - | 0.0% |        |
|                    | 2  | 0.0%   | 0.0% | 0.0% | 0.0%  | 0.0%  | -          | 0.0% | 0.0% | 0.0% | 0.0% | -      | - | 0.0% | - | 0.0% |        |
|                    | 3  | 0.0%   | 0.0% | 0.0% | 0.0%  | 0.0%  | -          | 0.0% | 0.0% | 0.0% | 0.0% | -      | - | 0.0% | - | 0.0% |        |
|                    | 4  | 0.0%   | 0.0% | 0.0% | 0.0%  | 0.0%  | -          | 0.0% | 0.0% | 0.0% | 0.0% | -      | - | 0.0% | - | 0.0% |        |
|                    | 5  | 0.0%   | 0.0% | 0.0% | 0.0%  | 0.0%  | -          | 0.0% | 0.0% | 0.0% | 0.0% | -      | - | 0.0% | - | 0.0% |        |
|                    | 6  | 0.0%   | 0.0% | 0.0% | 0.0%  | 0.0%  | -          | 0.0% | 0.0% | 2.8% | 0.0% | -      | - | 0.0% | - | 0.0% |        |
|                    | 7  | 0.0%   | 0.0% | 0.0% | 1.9%  | 0.0%  | -          | 0.0% | 0.0% | 0.0% | 0.0% | -      | - | 0.0% | - | 0.0% |        |
|                    | 8  | 0.0%   | 0.0% | 0.0% | 0.0%  | 1.4%  | -          | 0.0% | 0.0% | 1.3% | 0.0% | -      | - | 0.0% | - | 0.0% |        |
|                    | 9  | 0.0%   | 0.0% | 0.0% | 1.8%  | 0.0%  | -          | 0.0% | 0.0% | 0.0% | 1.6% | -      | - | 0.0% | - | 0.0% |        |
|                    | 10 | 0.0%   | 0.0% | 0.0% | 0.0%  | 4.1%  | -          | 0.0% | 0.0% | 0.0% | 0.0% | -      | - | 0.0% | - | 0.0% |        |
|                    | 11 | 0.0%   | 0.0% | 0.0% | 0.0%  | 0.0%  | -          | 0.0% | 0.0% | 0.0% | 0.0% | -      | - | 0.0% | - | 0.0% |        |
|                    | 12 | 0.0%   | 0.0% | 0.0% | 0.0%  | 0.0%  | -          | 0.0% | 0.0% | 0.0% | 1.9% | -      | - | 0.0% | - | 0.0% |        |
|                    | 13 | 0.0%   | 0.0% | 0.0% | 0.0%  | 0.0%  | -          | 0.0% | 0.0% | 0.0% | 0.0% | -      | - | 0.0% | - | 0.0% |        |
|                    | 14 | 0.0%   | 0.0% | 0.0% | 0.0%  | 0.0%  | -          | 0.0% | 0.0% | 0.0% | 0.0% | -      | - | 0.0% | - | 0.0% |        |
|                    | 15 | 0.0%   | 0.0% | 0.0% | 2.9%  | 0.0%  | -          | 0.0% | 0.0% | 0.0% | 0.0% | -      | - | 0.0% | - | 0.0% |        |
|                    | 16 | 0.0%   | 0.0% | 0.0% | 0.0%  | 0.0%  | -          | 0.0% | 0.0% | 0.0% | 1.9% | -      | - | 0.0% | - | 0.0% |        |
|                    | 17 | 0.0%   | 0.0% | 0.0% | 4.0%  | 0.0%  | -          | 0.0% | 0.0% | 2.0% | 0.0% | -      | - | 0.0% | - | 0.0% |        |
|                    | 18 | 0.0%   | 0.0% | 0.0% | 2.7%  | 2.9%  | -          | 0.0% | 0.0% | 4.0% | 0.0% | -      | - | 0.0% | - | 0.0% |        |
|                    | 19 | 0.0%   | 0.0% | 0.0% | 0.0%  | 0.0%  | -          | 0.0% | 0.0% | 1.8% | 0.0% | -      | - | 0.0% | - | 0.0% |        |
|                    | 20 | 0.0%   | 0.0% | 0.0% | 1.5%  | 5.3%  | -          | 0.0% | 0.0% | 1.5% | 7.9% | -      | - | 0.0% | - | 0.0% |        |
|                    | 21 | 0.0%   | 4.6% | 0.0% | 0.0%  | 0.0%  | -          | 0.0% | 0.0% | 4.1% | 0.0% | -      | - | 0.0% | - | 0.0% |        |
|                    | 22 | 0.0%   | 0.0% | 0.0% | 5.9%  | 4.8%  | -          | 2.3% | 0.0% | 1.5% | 2.4% | -      | - | 0.0% | - | 0.0% |        |
|                    | 23 | 0.0%   | 2.3% | 0.0% | 2.9%  | 6.3%  | -          | 0.0% | 0.0% | 1.4% | 0.0% | -      | - | 0.0% | - | 1.6% |        |
|                    | 24 | 0.0%   | 1.4% | 0.0% | 2.0%  | 12.8% | -          | 0.0% | 0.0% | 2.0% | 4.3% | -      | - | 0.0% | - | 0.0% |        |
|                    | 25 | 0.0%   | 0.0% | 1.3% | 6.8%  | 10.7% | -          | 0.0% | 1.3% | 5.7% | 4.8% | -      | - | 1.3% | - | 1.2% |        |
|                    | 26 | 0.0%   | 2.0% | 1.8% | 5.7%  | 4.5%  | -          | 0.0% | 0.0% | 3.8% | 1.8% | -      | - | 0.0% | - | 0.0% |        |
|                    | 27 | 0.0%   | 0.0% | 1.8% | 9.6%  | 11.1% | -          | 0.0% | 0.0% | 2.1% | 6.2% | -      | - | 0.0% | - | 2.5% |        |
|                    | 28 | 0.0%   | 0.0% | 4.8% | 13.6% | 11.6% | -          | 0.0% | 0.0% | 4.5% | 1.8% | -      | - | 0.0% | - | 0.0% |        |
|                    | 29 | 0.0%   | 2.5% | 2.5% | 15.6% | 6.3%  | -          | 0.0% | 0.0% | 1.8% | 1.3% | -      | - | 0.0% | - | 0.0% |        |
|                    | 30 | 0.0%   | 0.9% | 4.2% | 15.5% | 19.7% | -          | 0.9% | 0.5% | 4.9% | 4.2% | -      | - | 0.0% | - | 0.0% |        |
| a)                 |    | 1      | 2    | 3    | 4     | 5     | 1          | 2    | 3    | 4    | 5    | 1      | 2 | 3    | 4 | 5    |        |

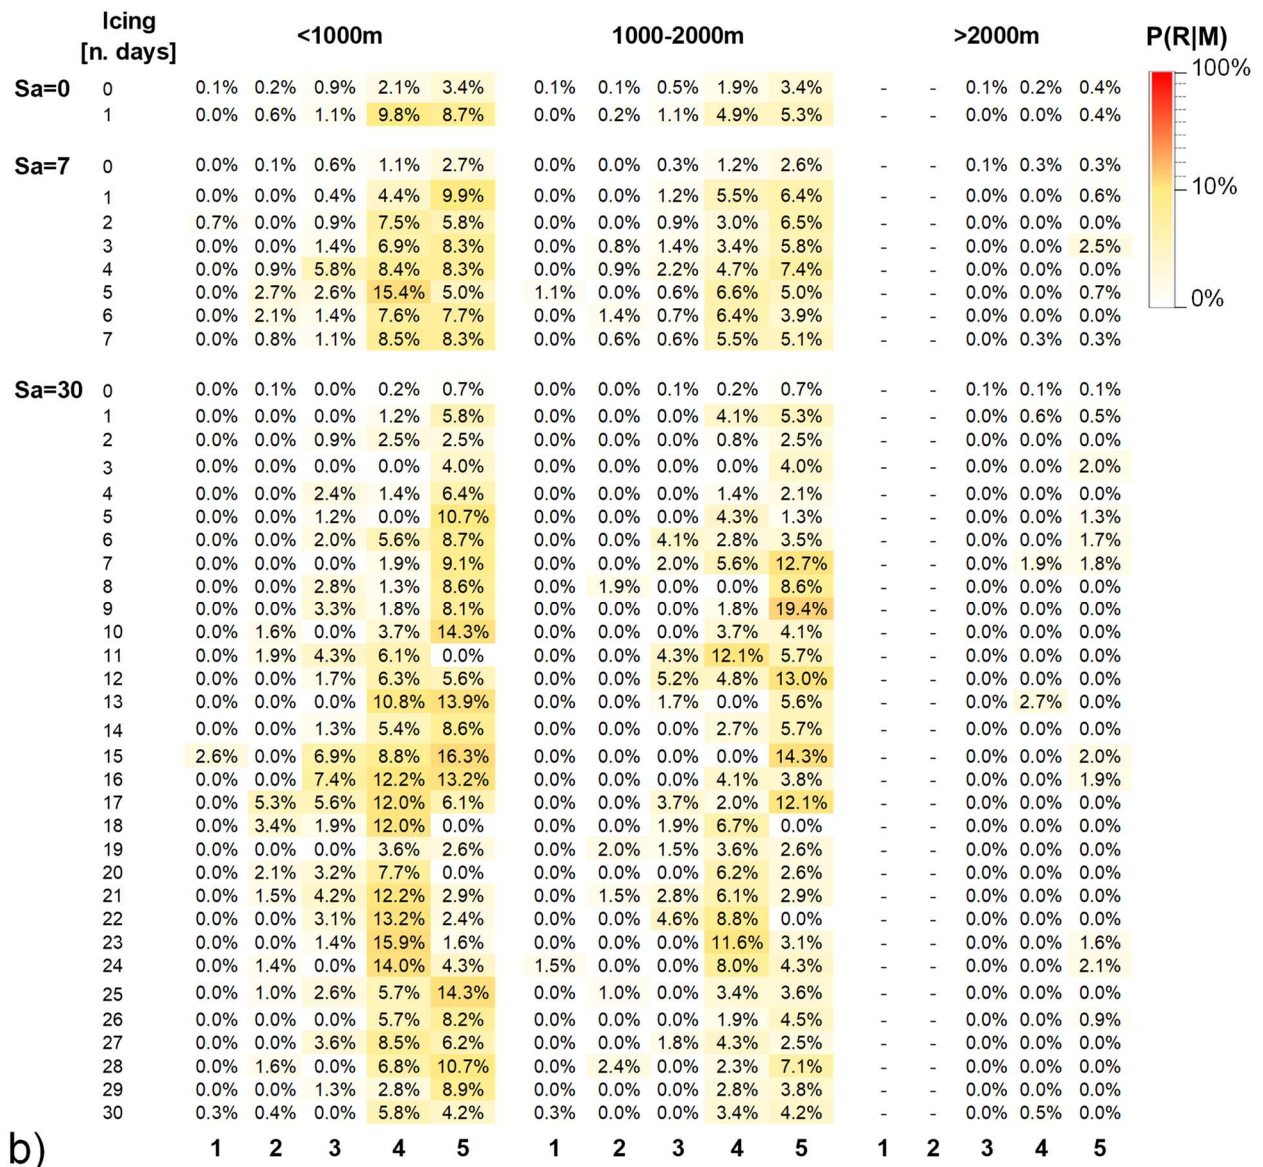

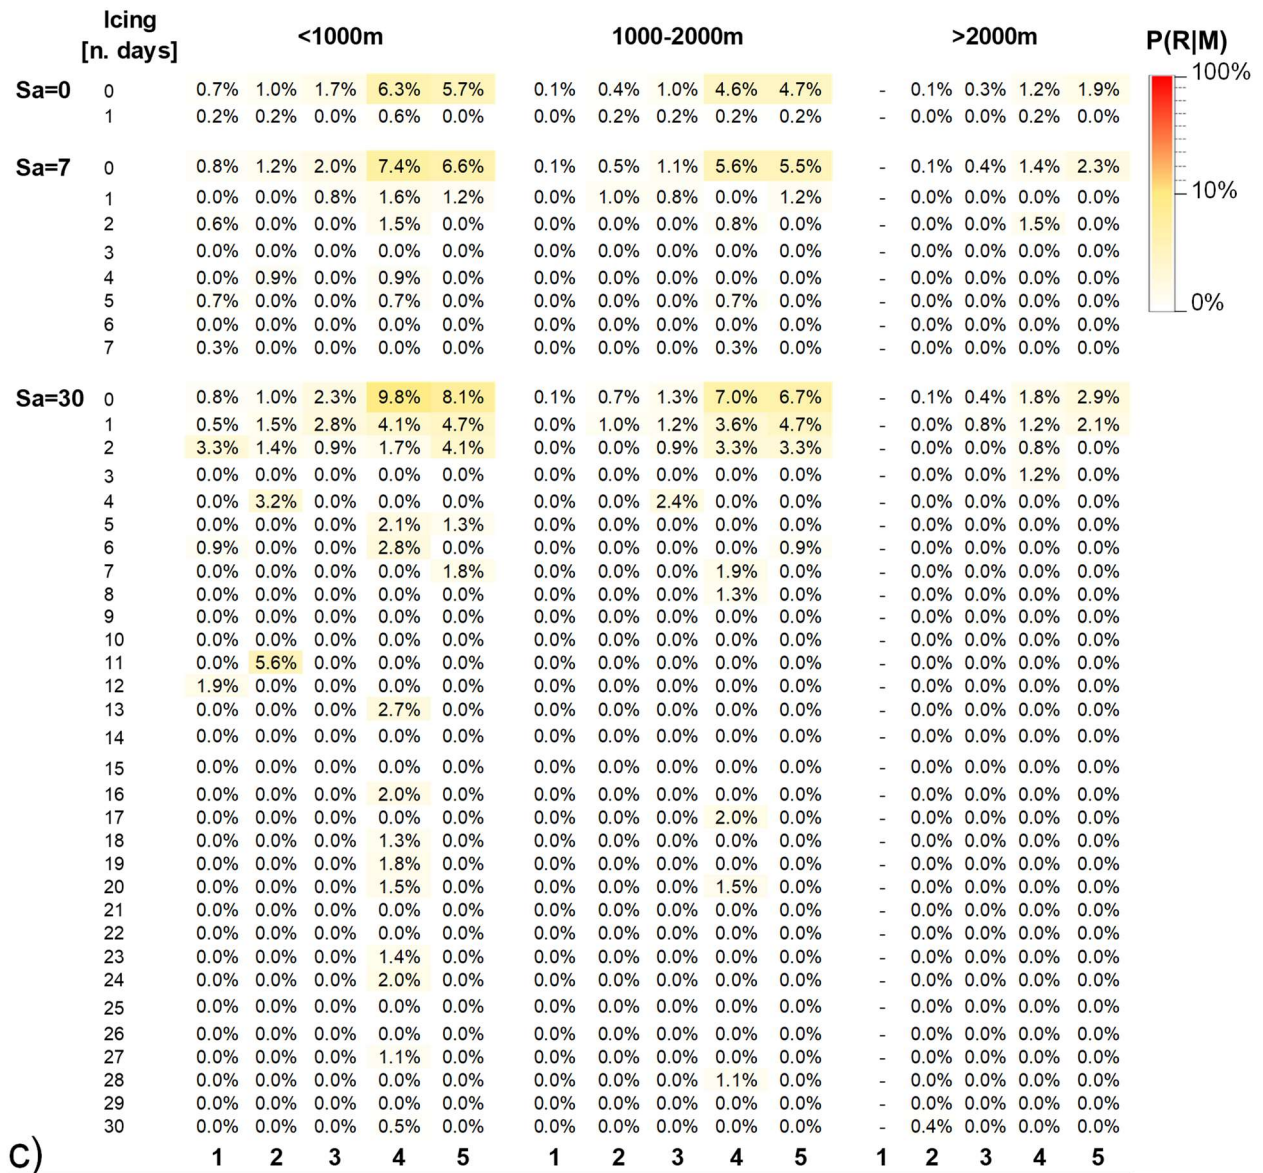



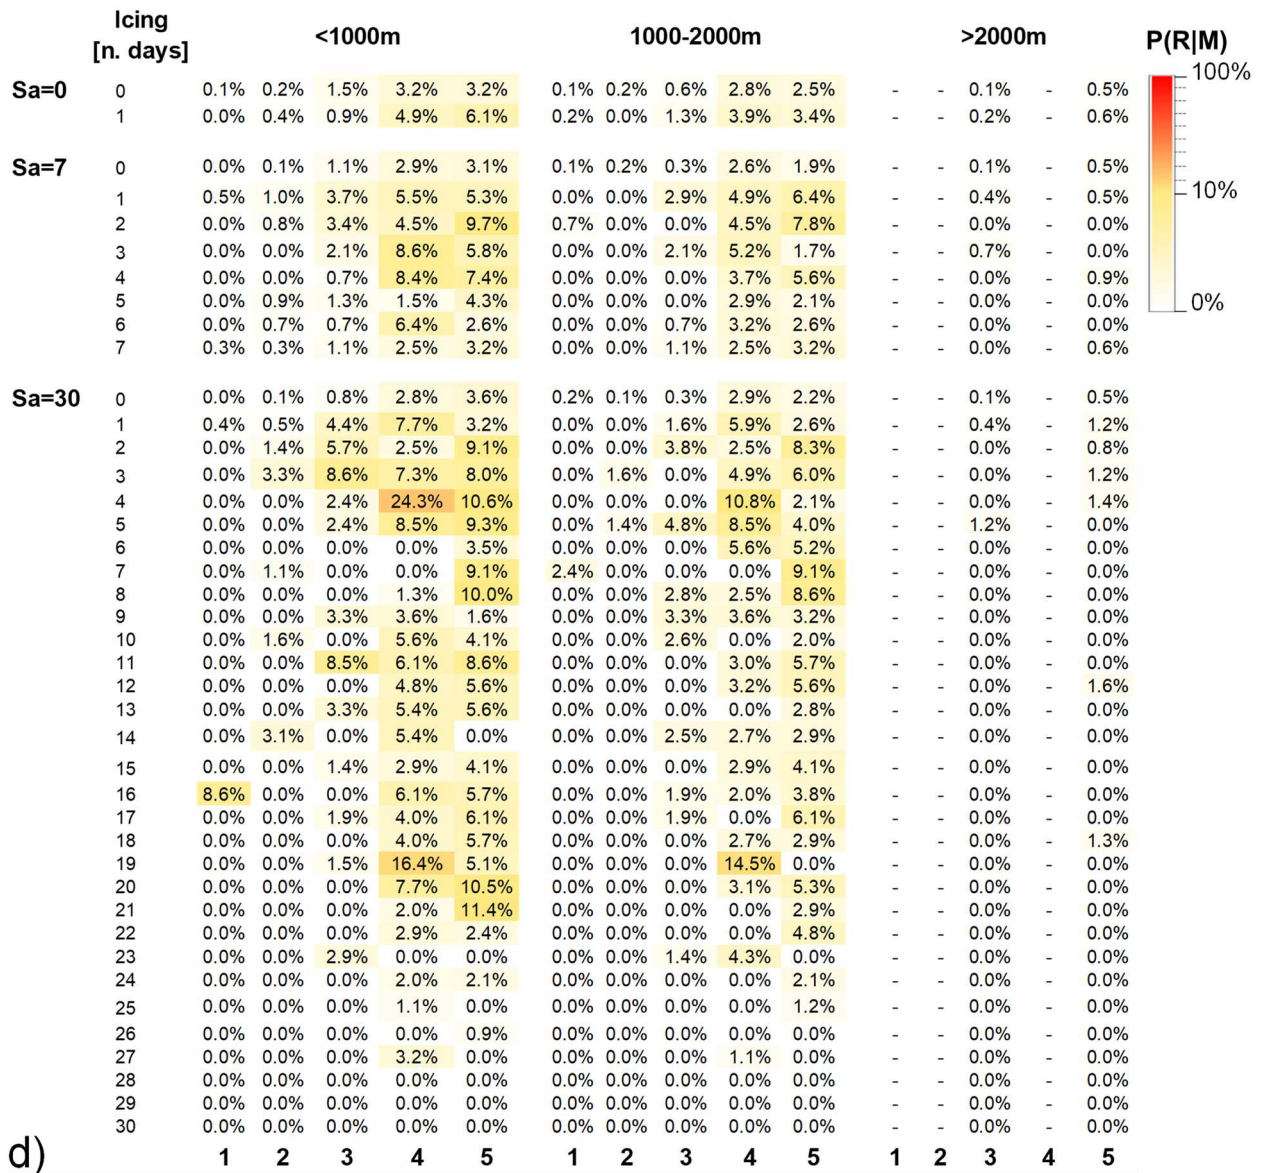

Fig. S32 Conditional probability,  $P(R|M)$ , calculated with Bayesian's method of icing minimum case with different aggregation scales  $S_a$  (0, 7, 30) and for different altitudes (<1000m, 1000m-2000m, >2000m) for 5 decades (1=1970-1979; 2=1980-1989; 3=1990-1999; 4=2000-2009; 5=2010-2019). (a) winter; (b) spring; (c) summer (d) autumn.



### S3 Rockfalls and climate variables (with triangular interpolation method)

This section presents selected results for the conditional probability of rockfall, computed using the triangular interpolation method. This method utilizes data from the three meteorological stations nearest to and encompassing each rockfall event. These results are provided for comparison with the primary findings reported in the main paper, which were derived using data from all available meteorological stations.

#### S3.1 Rainfall

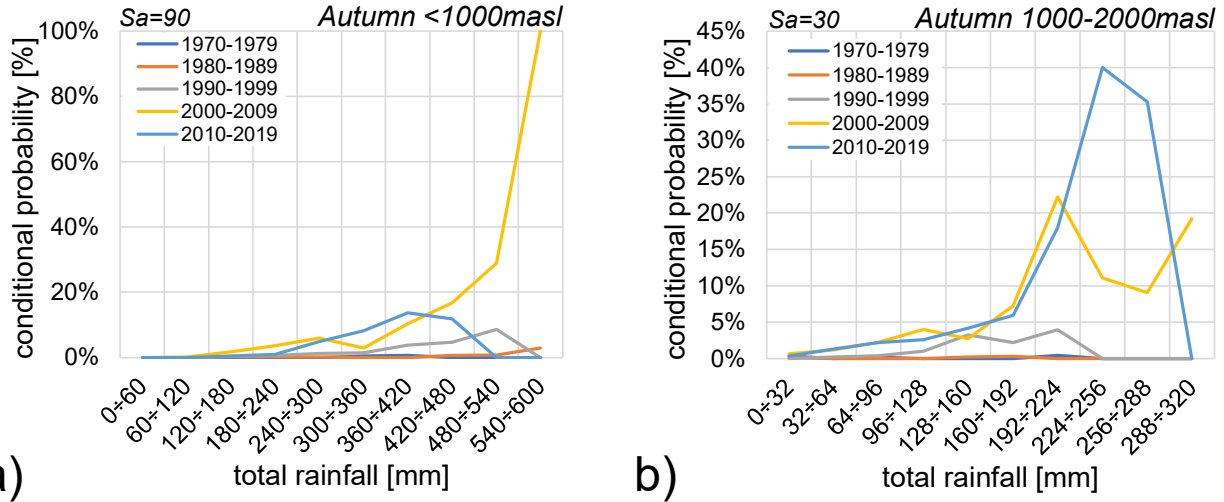

Fig. S33 Conditional probabilities of rockfalls triggered by rainfall during the autumn season (1970–2019). (a) Below 1000 m a.s.l., considering an aggregation scale of  $S_a = 90$  days. (b) Between 1000 and 2000 m a.s.l., considering an aggregation scale of  $S_a = 30$  days.

#### S3.2 Mean air temperature

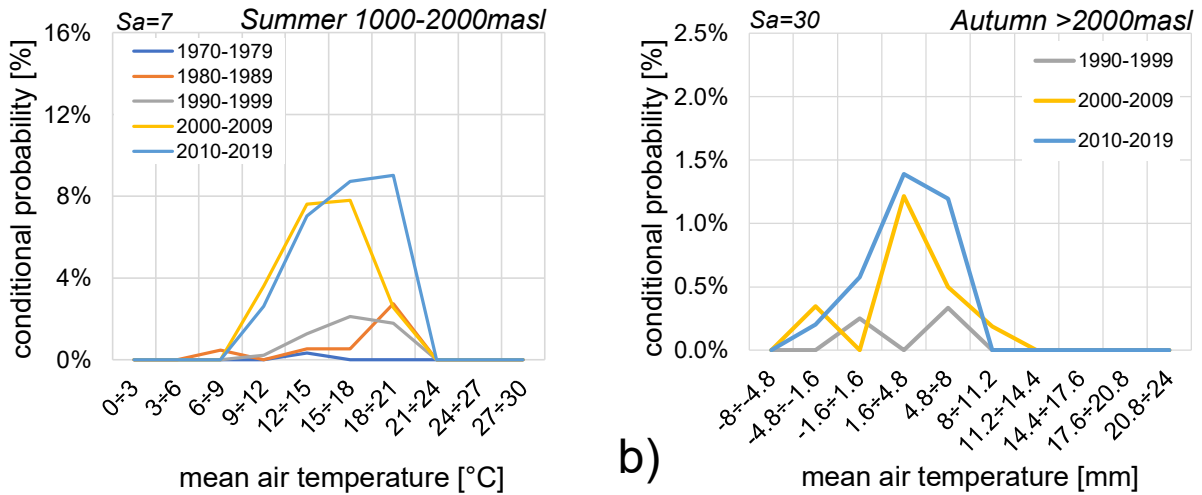

Fig. S34 Conditional probabilities of rockfalls conditioned by mean temperature values (1970–2019) for two scenarios: (a) Summer season at 1000-2000 m a.s.l. with an aggregation scale  $S_a = 7$  days. (b) Autumn season above 2000 m a.s.l. with an aggregation scale  $S_a = 30$  days.

### S3.3 Temperature amplitude

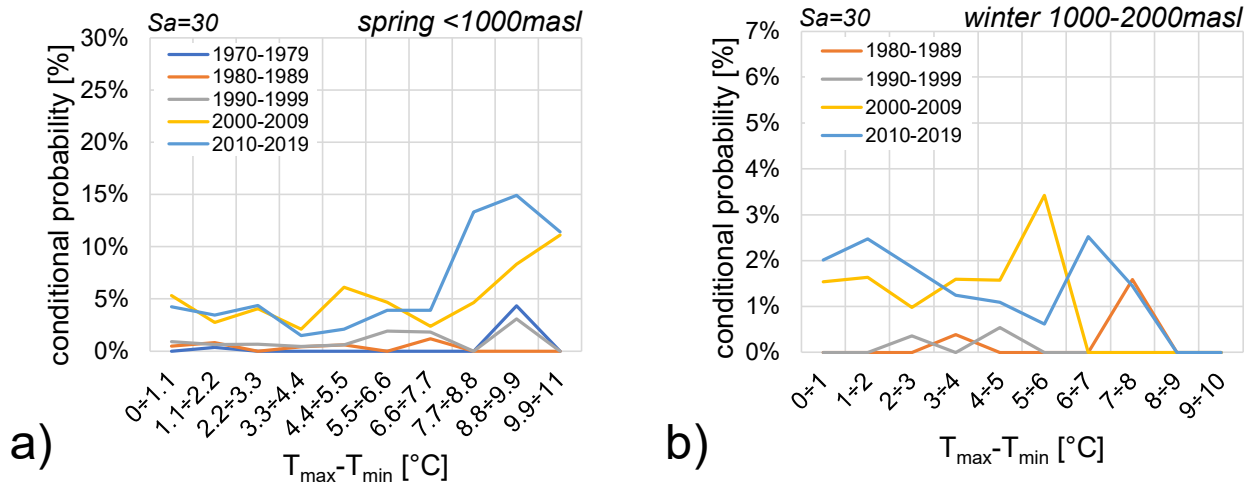

Fig. S35 Conditional probabilities of rockfalls conditioned by ranges of temperature amplitude (1970-2019) at the same aggregation scale  $S_a = 30$  days. (a) during spring season below 1000 m a.s.l.; (b) during winter season between 1000 m-2000 m a.s.l..

### S3.4 Air mean Temperature variation

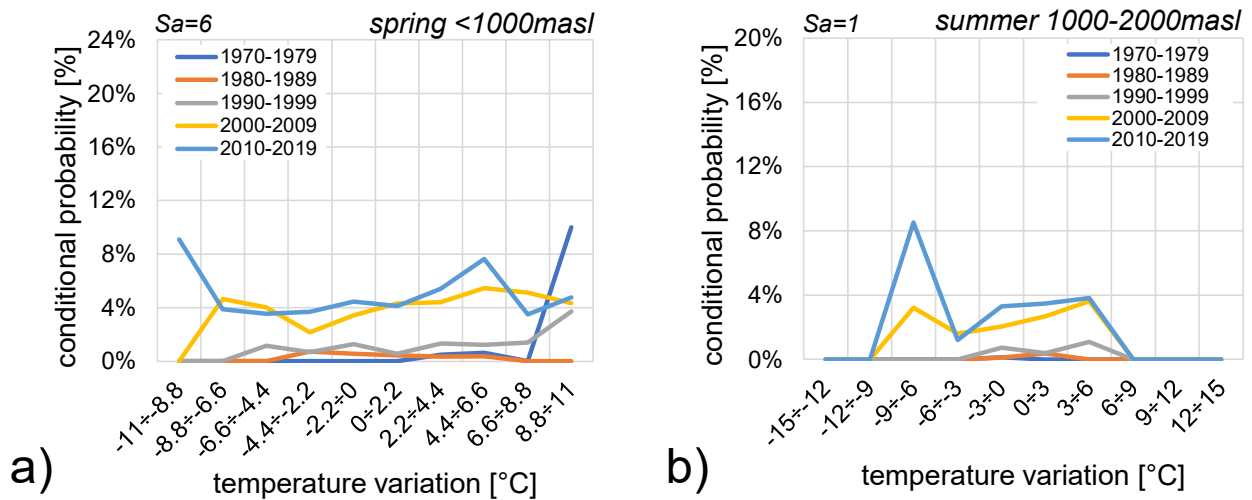

Fig. S36 Conditional probabilities of rockfalls conditioned by air mean temperature variation (1970-2019) during: (a) spring season below 1000 m a.s.l., with an aggregation scale  $S_a = 6$  days and (b) during summer season between 1000-2000 m a.s.l., with an aggregation scale  $S_a = 1$  day.

### S3.5 Freeze-Thaw cycle and icing

winter <1000masl

*Minimum time-series*

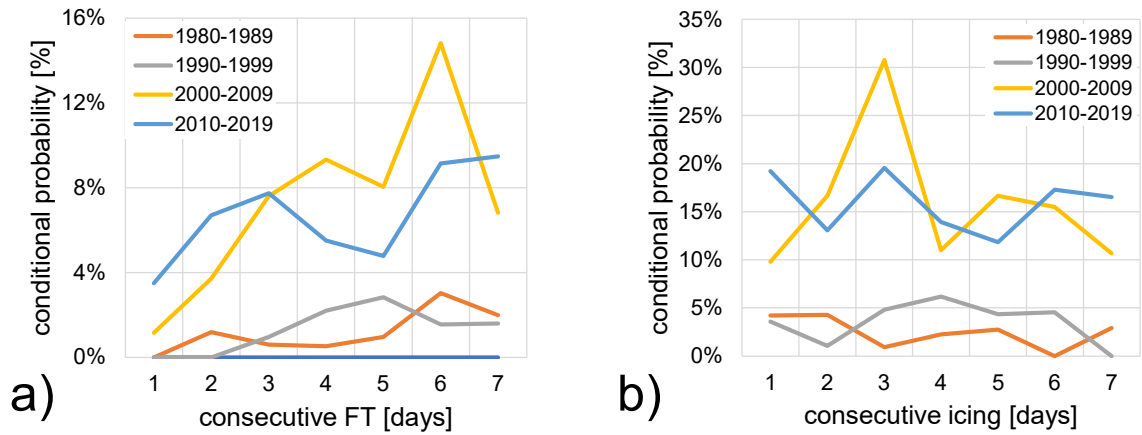

*Mean time-series*

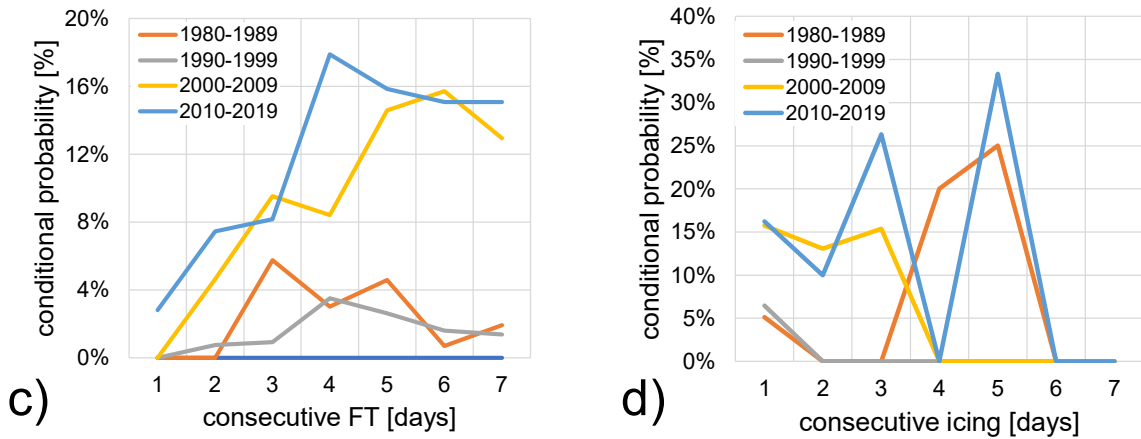

**Fig. S37** Conditional probabilities of rockfalls conditioned by various meteorological parameters during the winter season below 1000 m a.s.l. (1970–2019). All scenarios use an aggregation scale  $S_a = 7$  days. The conditioning parameters and time series are: (a and c) freeze-thaw cycles, using the minimum and mean times-series, respectively; (b and d) icing, using the minimum and maximum time-series, respectively.

spring 1000-2000masl  
*Minimum time-series*

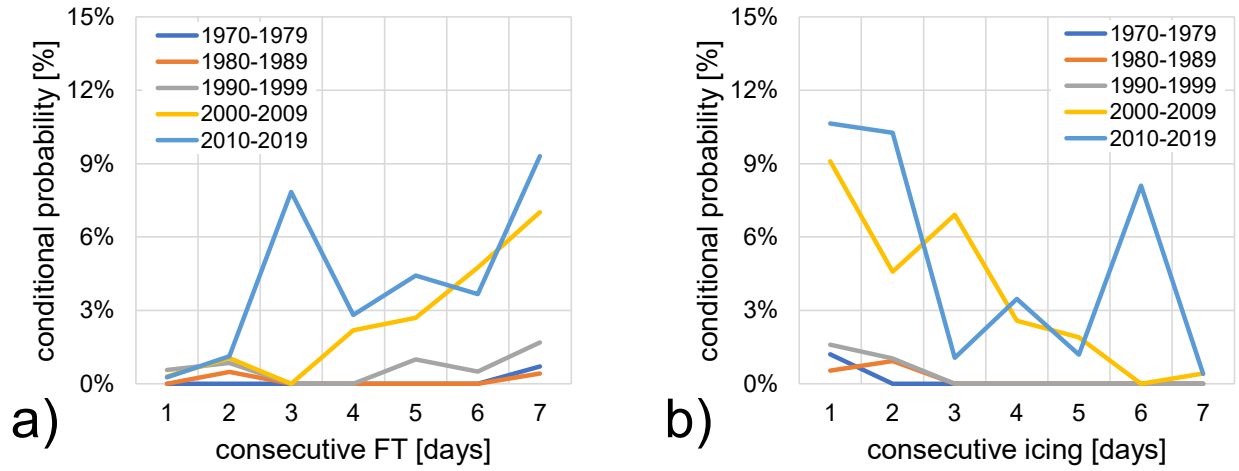

*Mean time-series*

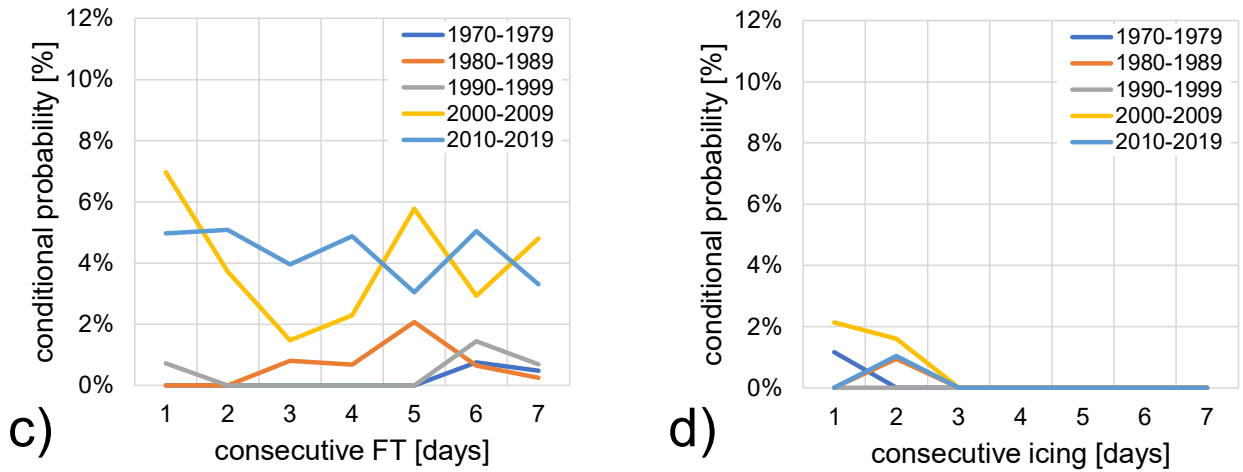

**Fig. S38** Conditional probabilities of rockfalls conditioned by various meteorological parameters during the spring season below 1000 m a.s.l. (1970-2019). The conditioning parameters and time series are: (a and c) consecutive freeze-thaw days (or consecutive cycles), using the minimum and mean times-series, respectively; (b and d) consecutive icing days, using the minimum and mean times-series, respectively.
